# Supplementary material
Source: PubMed Central journal article supplement (PMC4807526)
Supplement: AEM.03486-15_zam999117028so1.pdf [file AEM.03486-15_zam999117028so1.pdf]

**Fig.S1** The dispersion and parallelity of transcriptome sequencing. (A) The overall expression level of genes in four groups. (B) The scatter diagrams of all genes' levels among four groups. (C) The scatter diagrams of gene expression in groups between JZ6\_10 and JZ6\_28, TZ19\_10 and TZ19\_28, JZ6\_10 and TZ19\_10.

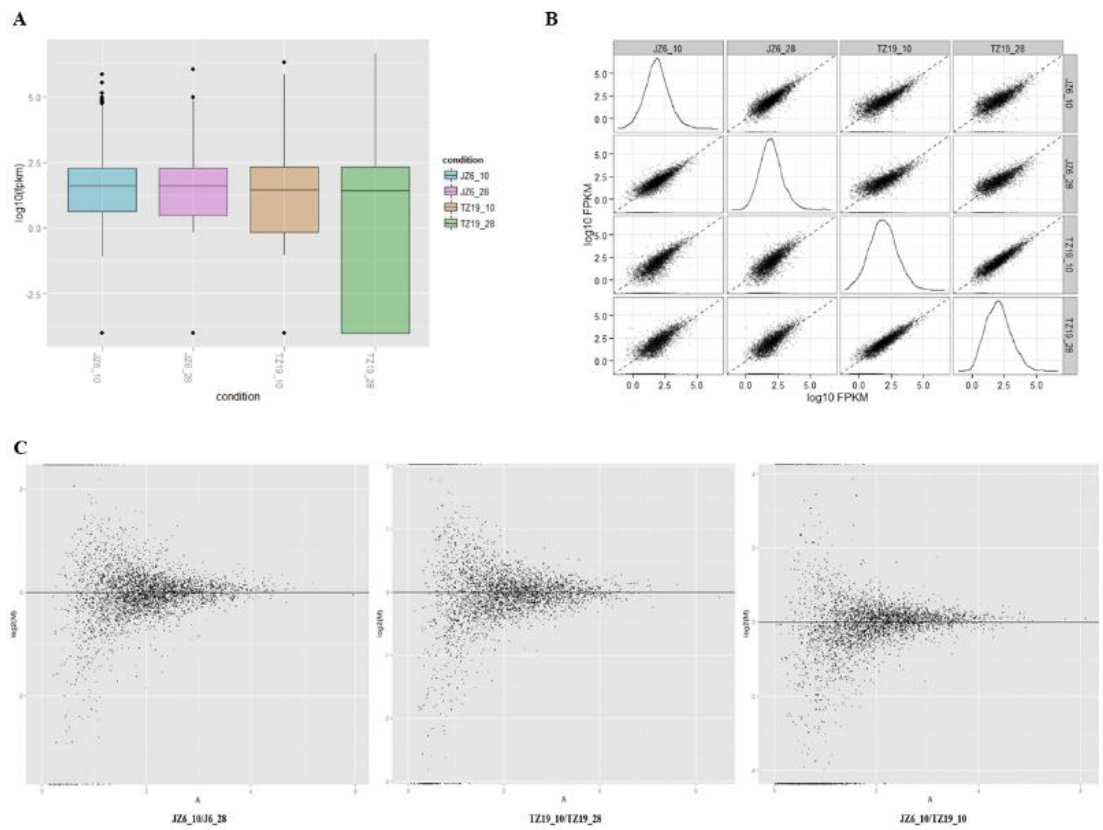



**Fig.S3** The KEGG analysis of up-regulated genes of JZ6\_10 group in “Prokaryotic-type ABC transporters” pathway. (The genes participated in this pathway of *V. splendidus* were labeled with orange and green. And the red genes were up-regulated in JZ6 at 10 °C).

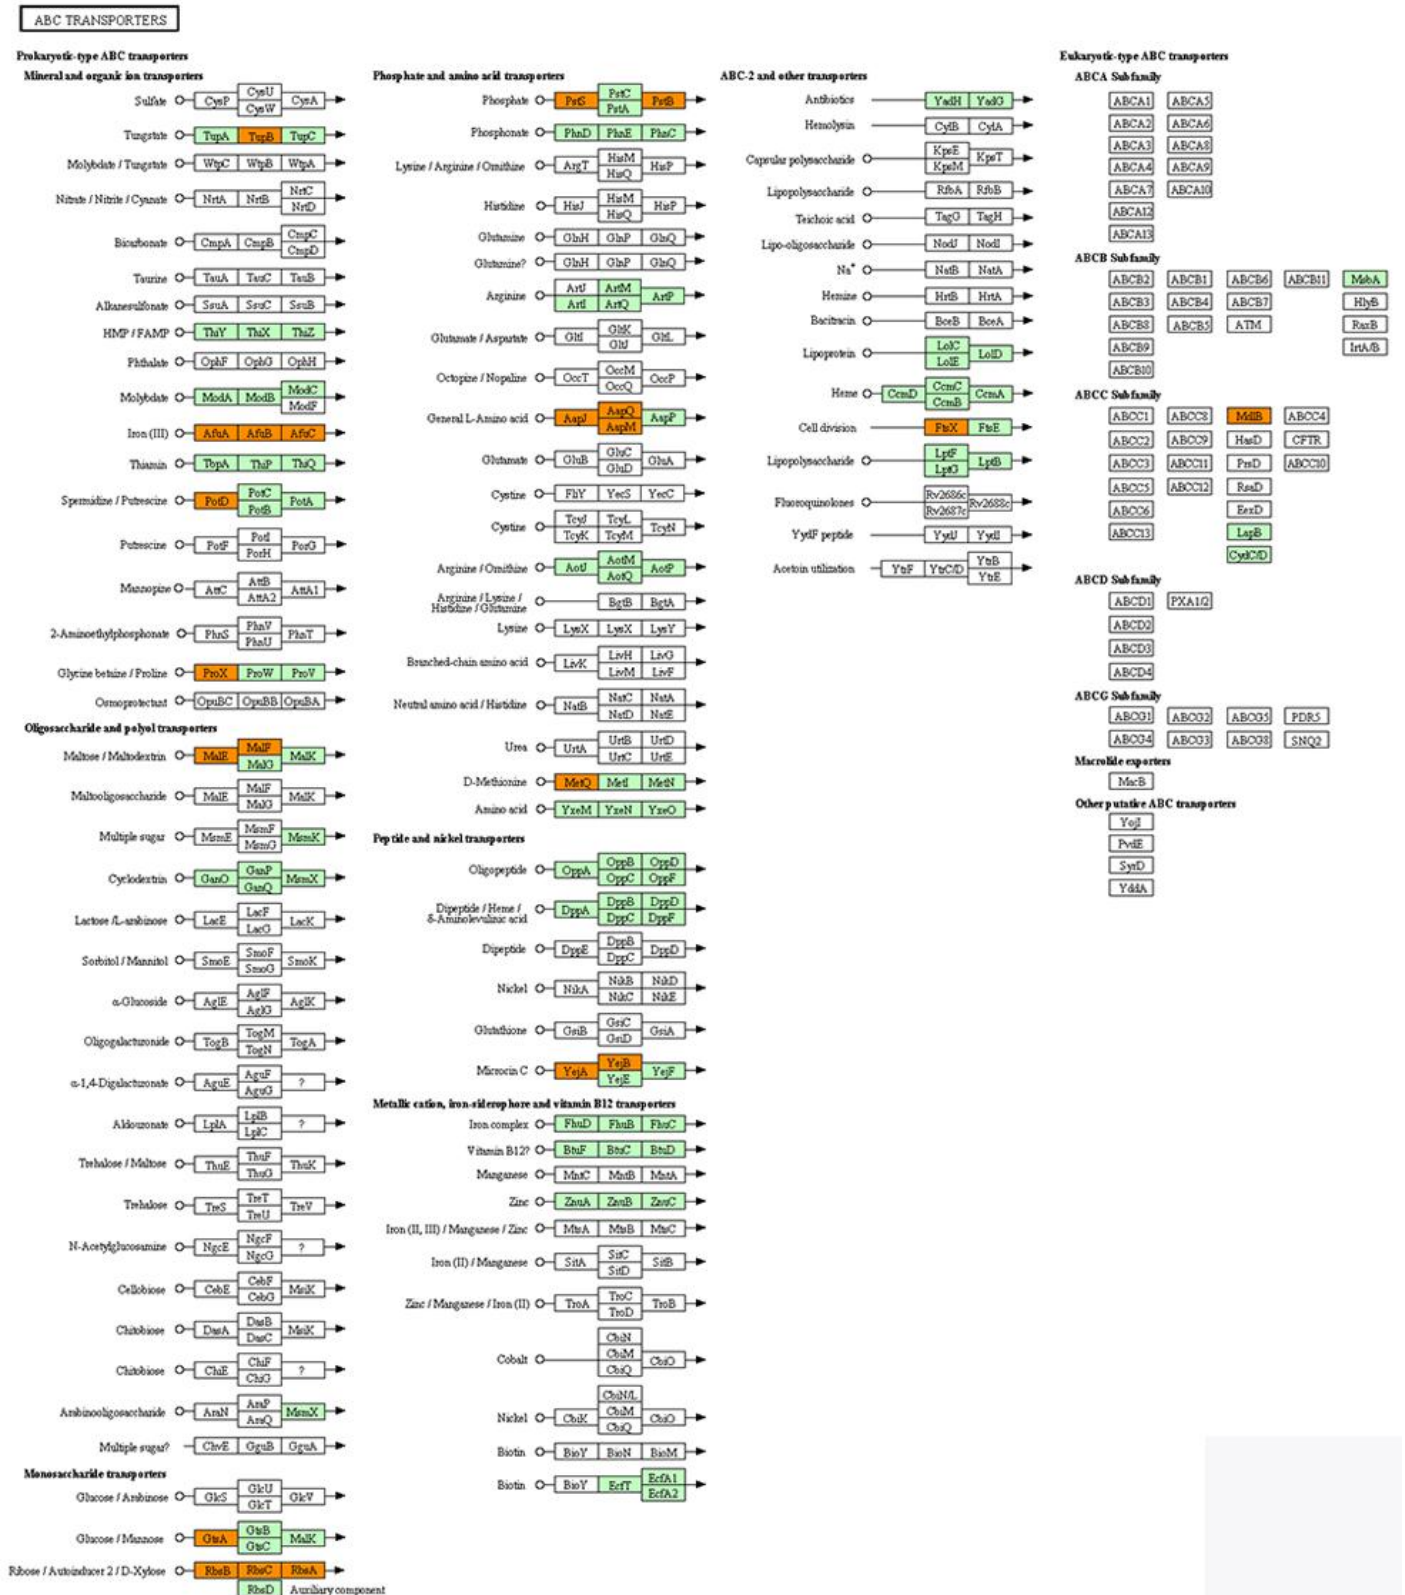

**Fig.S4** The KEGG analysis of up-regulated genes of JZ6\_10 group in “Vibrio Cholerae pathogenic cycle” pathway. (The genes participated in this pathway of *V. splendidus* were labeled with orange and green. And the red genes were up-regulated in JZ6 at 10 °C).

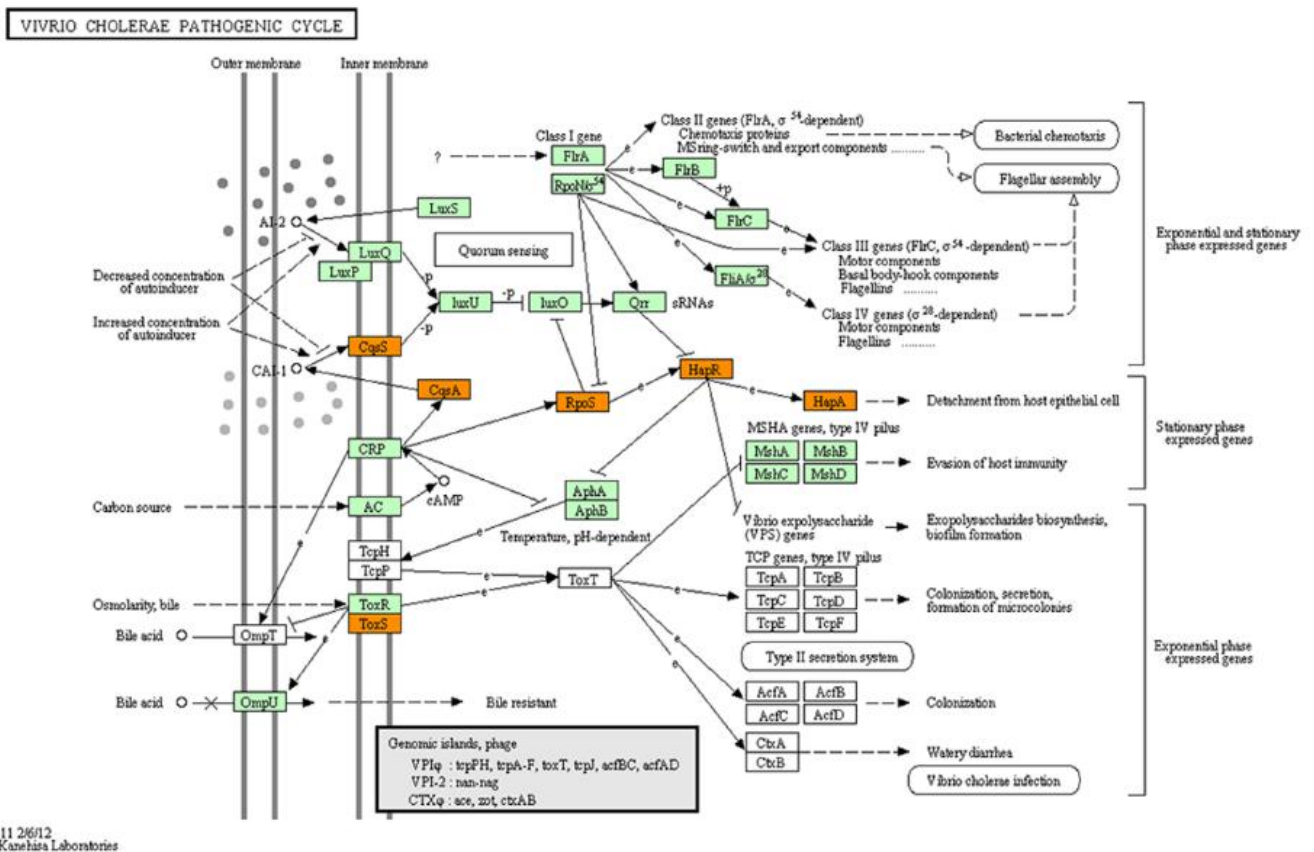

**Fig.S5** The Go distribution and gene enrichment analysis of down-regulated genes of strain JZ6 at 10 °C (JZ6\_10).

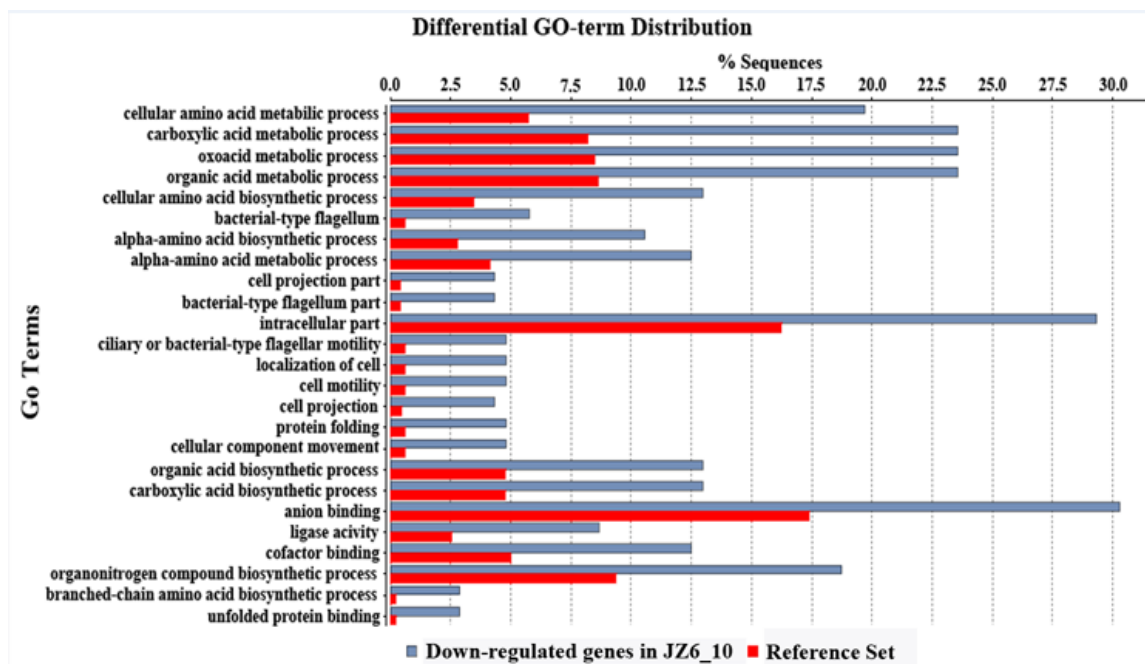

Table S1 List of differentially expressed genes in strain JZ6 at 10 °C (JZ6\_10) versus at 28 °C (JZ6\_28).

| Gene name                                                   | Group1 | Group2 | States | FPKM1   | FPKM2   | E-value1 | E-value2 | Significant |
|-------------------------------------------------------------|--------|--------|--------|---------|---------|----------|----------|-------------|
| putative transport protein                                  | JZ6_10 | JZ6_28 | OK     | 6.29448 | 1303.28 | 0        | 0        | yes         |
| PTS system, IIB component                                   | JZ6_10 | JZ6_28 | OK     | 13.8336 | 2669.43 | 4.90E-07 | 1.37E-06 | yes         |
| ABC transporter: substrate binding protein precursor        | JZ6_10 | JZ6_28 | OK     | 26.2372 | 2321.19 | 0        | 0        | yes         |
| ABC transporter: transmembrane protein; Arginine uptake     | JZ6_10 | JZ6_28 | OK     | 6.73578 | 550.432 | 4.44E-15 | 2.16E-14 | yes         |
| putative glycosyltransferase                                | JZ6_10 | JZ6_28 | OK     | 22.6609 | 1690.4  | 0        | 0        | yes         |
| PTS system, 3-keto-L-gulonate specific IIA component        | JZ6_10 | JZ6_28 | OK     | 39.6289 | 2810.94 | 0        | 0        | yes         |
| putative transporter                                        | JZ6_10 | JZ6_28 | OK     | 1.1261  | 65.0182 | 5.08E-08 | 1.55E-07 | yes         |
| hypothetical protein                                        | JZ6_10 | JZ6_28 | OK     | 96.2575 | 5402.93 | 2.73E-06 | 7.07E-06 | yes         |
| Small heat shock protein ibpA (16 kDa heat shock protein A) | JZ6_10 | JZ6_28 | OK     | 139.761 | 7145.19 | 0        | 0        | yes         |
| Conserved hypothetical protein                              | JZ6_10 | JZ6_28 | OK     | 8.49346 | 419.298 | 0        | 0        | yes         |
| Transcriptional regulator                                   | JZ6_10 | JZ6_28 | OK     | 3.73512 | 164.399 | 3.99E-07 | 1.12E-06 | yes         |
| Choline dehydrogenase                                       | JZ6_10 | JZ6_28 | OK     | 1.25336 | 53.6046 | 4.92E-07 | 1.37E-06 | yes         |
| ABC transporter: transmembrane protein; Arginine uptake     | JZ6_10 | JZ6_28 | OK     | 22.8406 | 935.016 | 0        | 0        | yes         |
| NAD-dependent aldehyde dehydrogenase                        | JZ6_10 | JZ6_28 | OK     | 1.50403 | 49.9922 | 2.94E-06 | 7.57E-06 | yes         |
| ABC transporter: ATP-binding protein                        | JZ6_10 | JZ6_28 | OK     | 22.9317 | 594.951 | 0        | 0        | yes         |
| hypothetical protein                                        | JZ6_10 | JZ6_28 | OK     | 3.8441  | 88.5471 | 3.29E-06 | 8.44E-06 | yes         |
| putative transporter, BCCT family                           | JZ6_10 | JZ6_28 | OK     | 4.34448 | 85.8436 | 1.28E-12 | 5.40E-12 | yes         |
| Histidinol-phosphate aminotransferase                       | JZ6_10 | JZ6_28 | OK     | 32.0353 | 605.631 | 0        | 0        | yes         |
| hypothetical protein                                        | JZ6_10 | JZ6_28 | OK     | 65.6758 | 1231.95 | 0        | 0        | yes         |
| argininosuccinate synthase                                  | JZ6_10 | JZ6_28 | OK     | 176.545 | 2921    | 0        | 0        | yes         |
| hypothetical protein                                        | JZ6_10 | JZ6_28 | OK     | 56.0905 | 865.372 | 0        | 0        | yes         |
| Transcriptional regulator, TetR family                      | JZ6_10 | JZ6_28 | OK     | 57.1252 | 826.165 | 0        | 0        | yes         |
| Lysine-arginine-ornithine-binding periplasmic protein       | JZ6_10 | JZ6_28 | OK     | 106.503 | 1516.25 | 0        | 0        | yes         |
| L-lactate permease                                          | JZ6_10 | JZ6_28 | OK     | 4.44025 | 62.1566 | 1.07E-10 | 4.02E-10 | yes         |
| Conserved hypothetical protein                              | JZ6_10 | JZ6_28 | OK     | 8.73954 | 119.452 | 0        | 0        | yes         |
| N-acetyl-gamma-glutamyl-phosphate reductase                 | JZ6_10 | JZ6_28 | OK     | 103.488 | 1366.32 | 0        | 0        | yes         |
| conserved hypothetical protein                              | JZ6_10 | JZ6_28 | OK     | 377.671 | 4980.41 | 0        | 0        | yes         |
| L-lactate dehydrogenase                                     | JZ6_10 | JZ6_28 | OK     | 7.28756 | 95.9656 | 1.88E-11 | 7.42E-11 | yes         |
| flagellar hook-associated protein FlgK                      | JZ6_10 | JZ6_28 | OK     | 4.57262 | 58.9758 | 2.45E-11 | 9.57E-11 | yes         |

|                                                               |        |        |    |         |         |          |          |     |
|---------------------------------------------------------------|--------|--------|----|---------|---------|----------|----------|-----|
| Glycyl-tRNA synthetase beta chain                             | JZ6_10 | JZ6_28 | OK | 15.21   | 186.976 | 0        | 0        | yes |
| Acetylglutamate kinase                                        | JZ6_10 | JZ6_28 | OK | 77.8444 | 954.321 | 0        | 0        | yes |
| hypothetical protein                                          | JZ6_10 | JZ6_28 | OK | 59.3809 | 715.545 | 2.42E-11 | 9.44E-11 | yes |
| hypothetical protein                                          | JZ6_10 | JZ6_28 | OK | 9.39791 | 113.117 | 0        | 0        | yes |
| Carbamoyl-phosphate synthase large chain                      | JZ6_10 | JZ6_28 | OK | 43.1336 | 497.917 | 0        | 0        | yes |
| Fe-S oxidoreductase                                           | JZ6_10 | JZ6_28 | OK | 6.11561 | 70.1894 | 0        | 0        | yes |
| cytochrome c oxidase, subunit CcoO                            | JZ6_10 | JZ6_28 | OK | 126.44  | 1425.66 | 0        | 0        | yes |
| Glycyl-tRNA synthetase alpha chain                            | JZ6_10 | JZ6_28 | OK | 36.7181 | 397.757 | 0        | 0        | yes |
| L-serine dehydratase 1                                        | JZ6_10 | JZ6_28 | OK | 30.9238 | 304.364 | 0        | 0        | yes |
| Acyl-CoA dehydrogenase                                        | JZ6_10 | JZ6_28 | OK | 68.8662 | 670.898 | 0        | 0        | yes |
| Permease of the drug-metabolite transporter (DMT) superfamily | JZ6_10 | JZ6_28 | OK | 21.8879 | 212.075 | 8.88E-16 | 4.47E-15 | yes |
| outer membrane protein N                                      | JZ6_10 | JZ6_28 | OK | 13.089  | 124.039 | 3.98E-12 | 1.63E-11 | yes |
| cytochrome c oxidase, subunit CcoP                            | JZ6_10 | JZ6_28 | OK | 14.1405 | 133.814 | 1.18E-11 | 4.73E-11 | yes |
| Hypothetical membrane protein                                 | JZ6_10 | JZ6_28 | OK | 35.323  | 331.425 | 0        | 0        | yes |
| hypothetical protein                                          | JZ6_10 | JZ6_28 | OK | 45.7886 | 421.694 | 0        | 0        | yes |
| Bifunctional protein argH                                     | JZ6_10 | JZ6_28 | OK | 91.2848 | 816.266 | 0        | 0        | yes |
| putative nitrogen regulatory protein P-II family protein      | JZ6_10 | JZ6_28 | OK | 72.6985 | 640.838 | 9.50E-12 | 3.82E-11 | yes |
| sensor protein LuxN                                           | JZ6_10 | JZ6_28 | OK | 2.66893 | 22.8647 | 2.51E-07 | 7.17E-07 | yes |
| Flagellar basal-body rod protein flgF                         | JZ6_10 | JZ6_28 | OK | 20.6809 | 175.219 | 3.13E-12 | 1.29E-11 | yes |
| Conserved hypothetical protein; putative exported             | JZ6_10 | JZ6_28 | OK | 8.14155 | 68.2498 | 8.41E-09 | 2.74E-08 | yes |
| hypothetical protein                                          | JZ6_10 | JZ6_28 | OK | 16.4876 | 138.071 | 1.50E-07 | 4.39E-07 | yes |
| Aldehyde dehydrogenase                                        | JZ6_10 | JZ6_28 | OK | 25.32   | 206.171 | 0        | 0        | yes |
| Hypothetical protein                                          | JZ6_10 | JZ6_28 | OK | 6.30138 | 49.5391 | 6.40E-08 | 1.94E-07 | yes |
| Permease of the drug metabolite transporter (DMT) superfamily | JZ6_10 | JZ6_28 | OK | 15.0415 | 117.157 | 1.73E-10 | 6.38E-10 | yes |
| sodium/solute symporter                                       | JZ6_10 | JZ6_28 | OK | 8.11371 | 63.181  | 5.72E-12 | 2.32E-11 | yes |
| hypothetical protein                                          | JZ6_10 | JZ6_28 | OK | 37.1602 | 288.632 | 1.10E-08 | 3.53E-08 | yes |
| putative endoribonuclease                                     | JZ6_10 | JZ6_28 | OK | 61.7596 | 478.678 | 5.20E-11 | 1.98E-10 | yes |
| conserved hypothetical protein                                | JZ6_10 | JZ6_28 | OK | 1219.77 | 9344.31 | 2.22E-16 | 1.15E-15 | yes |
| hypothetical protein                                          | JZ6_10 | JZ6_28 | OK | 79.8809 | 593.696 | 0        | 0        | yes |
| Adenylosuccinate synthetase                                   | JZ6_10 | JZ6_28 | OK | 13.9595 | 101.16  | 2.71E-12 | 1.13E-11 | yes |
| Histone acetyltransferase HPA2 and related acetyltransferases | JZ6_10 | JZ6_28 | OK | 55.3548 | 400.594 | 0        | 0        | yes |
| putative permease                                             | JZ6_10 | JZ6_28 | OK | 12.3691 | 87.4376 | 3.27E-07 | 9.26E-07 | yes |

|                                                           |        |        |    |         |         |          |          |     |
|-----------------------------------------------------------|--------|--------|----|---------|---------|----------|----------|-----|
| ubiquinol-cytochrome c reductase,cytochrome c1            | JZ6_10 | JZ6_28 | OK | 90.2499 | 637.267 | 0        | 0        | yes |
| succinate dehydrogenase                                   | JZ6_10 | JZ6_28 | OK | 182.263 | 1282.81 | 0        | 0        | yes |
| Carbamoyl-phosphate synthase, small subunit               | JZ6_10 | JZ6_28 | OK | 63.5744 | 445.287 | 0        | 0        | yes |
| putative chaperone protein dnaK (Heat shock protein 70)   | JZ6_10 | JZ6_28 | OK | 5.56352 | 38.8005 | 3.53E-10 | 1.27E-09 | yes |
| putative permease                                         | JZ6_10 | JZ6_28 | OK | 175.766 | 1217.8  | 0        | 0        | yes |
| hypothetical protein                                      | JZ6_10 | JZ6_28 | OK | 1187.02 | 8194.28 | 0        | 0        | yes |
| 60 kDa chaperonin (Protein Cpn60) (groEL protein)         | JZ6_10 | JZ6_28 | OK | 178.571 | 1226.63 | 0        | 0        | yes |
| DNA-binding response regulator                            | JZ6_10 | JZ6_28 | OK | 145.382 | 978.573 | 0        | 0        | yes |
| Chaperone protein dnaK                                    | JZ6_10 | JZ6_28 | OK | 733.564 | 4902.79 | 0        | 0        | yes |
| putative lipoprotein                                      | JZ6_10 | JZ6_28 | OK | 46.5239 | 306.032 | 0        | 0        | yes |
| Conserved hypothetical protein                            | JZ6_10 | JZ6_28 | OK | 9.38637 | 61.5224 | 4.57E-12 | 1.87E-11 | yes |
| Flagellar P-ring protein precursor                        | JZ6_10 | JZ6_28 | OK | 14.0166 | 91.216  | 3.42E-09 | 1.14E-08 | yes |
| Amino acid transporter                                    | JZ6_10 | JZ6_28 | OK | 44.8753 | 289.868 | 4.01E-13 | 1.74E-12 | yes |
| ATP-dependent protease hslV                               | JZ6_10 | JZ6_28 | OK | 71.2614 | 444.71  | 0        | 0        | yes |
| 2-oxoglutarate dehydrogenase E1 component                 | JZ6_10 | JZ6_28 | OK | 154.675 | 961.49  | 0        | 0        | yes |
| Isocitrate lyase                                          | JZ6_10 | JZ6_28 | OK | 30.7935 | 188.621 | 0        | 0        | yes |
| hypothetical protein                                      | JZ6_10 | JZ6_28 | OK | 25.6317 | 156.364 | 7.11E-15 | 3.41E-14 | yes |
| hypothetical protein                                      | JZ6_10 | JZ6_28 | OK | 27.3301 | 165.859 | 7.77E-07 | 2.13E-06 | yes |
| putative acetoin utilization protein                      | JZ6_10 | JZ6_28 | OK | 303.152 | 1837.5  | 0        | 0        | yes |
| Acetolactate synthase isozyme II large subunit            | JZ6_10 | JZ6_28 | OK | 13.1651 | 79.0869 | 2.40E-13 | 1.05E-12 | yes |
| putative Co-chaperonin GroES                              | JZ6_10 | JZ6_28 | OK | 208.262 | 1250.75 | 1.52E-12 | 6.39E-12 | yes |
| Urocanate hydratase                                       | JZ6_10 | JZ6_28 | OK | 6.62024 | 39.4756 | 3.05E-07 | 8.67E-07 | yes |
| Conserved hypothetical protein                            | JZ6_10 | JZ6_28 | OK | 88.9207 | 528.152 | 3.89E-06 | 9.90E-06 | yes |
| conserved hypothetical protein                            | JZ6_10 | JZ6_28 | OK | 82.2961 | 484.286 | 0        | 0        | yes |
| ATP phosphoribosyltransferase                             | JZ6_10 | JZ6_28 | OK | 220.641 | 1296.48 | 0        | 0        | yes |
| MutT/nudix family protein                                 | JZ6_10 | JZ6_28 | OK | 24.5238 | 139.36  | 3.70E-06 | 9.45E-06 | yes |
| Tripartite ATP-independent periplasmic transporters, DctQ | JZ6_10 | JZ6_28 | OK | 41.1812 | 230.987 | 4.17E-14 | 1.91E-13 | yes |
| putative hydrolase                                        | JZ6_10 | JZ6_28 | OK | 110.034 | 614.013 | 0        | 0        | yes |
| Transcriptional regulator                                 | JZ6_10 | JZ6_28 | OK | 32.5615 | 181.218 | 4.49E-11 | 1.72E-10 | yes |
| Ribonuclease P protein component                          | JZ6_10 | JZ6_28 | OK | 77.0445 | 427.667 | 7.97E-08 | 2.39E-07 | yes |
| Iron-regulated membrane protein                           | JZ6_10 | JZ6_28 | OK | 7.0595  | 39.0313 | 1.90E-06 | 5.02E-06 | yes |
| tetraacyldisaccharide 4'-kinase                           | JZ6_10 | JZ6_28 | OK | 24.3241 | 134.459 | 7.84E-12 | 3.16E-11 | yes |



|                                                            |        |        |    |         |         |          |          |     |
|------------------------------------------------------------|--------|--------|----|---------|---------|----------|----------|-----|
| NifU-related domain containing protein                     | JZ6_10 | JZ6_28 | OK | 75.4602 | 414.399 | 0        | 0        | yes |
| Flagellin core protein A                                   | JZ6_10 | JZ6_28 | OK | 36.8291 | 201.716 | 0        | 0        | yes |
| conserved hypothetical protein                             | JZ6_10 | JZ6_28 | OK | 231.31  | 1265.9  | 0        | 0        | yes |
| Hypothetical membrane protein                              | JZ6_10 | JZ6_28 | OK | 16.1258 | 87.5234 | 2.55E-10 | 9.30E-10 | yes |
| Chaperone protein htpG                                     | JZ6_10 | JZ6_28 | OK | 79.6572 | 428.341 | 0        | 0        | yes |
| putative cation transport ATPase                           | JZ6_10 | JZ6_28 | OK | 8.36461 | 44.4171 | 5.33E-10 | 1.89E-09 | yes |
| Ubiquinol-cytochrome c reductase, cytochrome B             | JZ6_10 | JZ6_28 | OK | 130.049 | 682.909 | 0        | 0        | yes |
| Polar flagellar FlgC                                       | JZ6_10 | JZ6_28 | OK | 149.409 | 780.493 | 2.66E-15 | 1.31E-14 | yes |
| hypothetical protein                                       | JZ6_10 | JZ6_28 | OK | 1088.46 | 5621.49 | 3.76E-07 | 1.06E-06 | yes |
| Phosphoglycerate dehydrogenase                             | JZ6_10 | JZ6_28 | OK | 14.3924 | 74.3184 | 1.68E-06 | 4.46E-06 | yes |
| putative lactoylglutathione lyase                          | JZ6_10 | JZ6_28 | OK | 57.9042 | 298.534 | 3.70E-08 | 1.14E-07 | yes |
| ATP-dependent hsl protease ATP-binding subunit hslU        | JZ6_10 | JZ6_28 | OK | 97.2388 | 496.917 | 0        | 0        | yes |
| Polar flagellin B                                          | JZ6_10 | JZ6_28 | OK | 123.178 | 629.386 | 0        | 0        | yes |
| putative succinate dehydrogenase, flavoprotein subunit     | JZ6_10 | JZ6_28 | OK | 325.864 | 1664.98 | 0        | 0        | yes |
| Serine transporter                                         | JZ6_10 | JZ6_28 | OK | 75.0097 | 381.09  | 0        | 0        | yes |
| hypothetical protein                                       | JZ6_10 | JZ6_28 | OK | 137.524 | 681.485 | 4.44E-14 | 2.03E-13 | yes |
| Adenylosuccinate lyase                                     | JZ6_10 | JZ6_28 | OK | 142.699 | 688.806 | 0        | 0        | yes |
| Hypothetical protein                                       | JZ6_10 | JZ6_28 | OK | 17.4352 | 83.9872 | 7.62E-07 | 2.09E-06 | yes |
| Phenylalanyl-tRNA synthetase beta chain                    | JZ6_10 | JZ6_28 | OK | 67.2875 | 321.09  | 0        | 0        | yes |
| Dihydrolipoyllysine-residue succinyltransferase            | JZ6_10 | JZ6_28 | OK | 242.93  | 1147.16 | 0        | 0        | yes |
| putative tyrosine-protein kinase (wzc)                     | JZ6_10 | JZ6_28 | OK | 18.6752 | 87.2546 | 0        | 0        | yes |
| Phosphoenolpyruvate carboxykinase                          | JZ6_10 | JZ6_28 | OK | 2390.69 | 11132.9 | 0        | 0        | yes |
| Mg(2+) transport ATPase protein C                          | JZ6_10 | JZ6_28 | OK | 120.532 | 558.945 | 4.66E-15 | 2.26E-14 | yes |
| Glutathione reductase                                      | JZ6_10 | JZ6_28 | OK | 111.934 | 512.091 | 0        | 0        | yes |
| AraC-type DNA-binding domain-containing protein            | JZ6_10 | JZ6_28 | OK | 22.387  | 101.776 | 2.42E-07 | 6.95E-07 | yes |
| hypothetical protein                                       | JZ6_10 | JZ6_28 | OK | 115.467 | 519.455 | 3.48E-06 | 8.91E-06 | yes |
| NAD-dependent malic enzyme                                 | JZ6_10 | JZ6_28 | OK | 61.0781 | 273.921 | 0        | 0        | yes |
| Aconitate hydratase 2 (Citrate hydro-lyase 2)              | JZ6_10 | JZ6_28 | OK | 306.731 | 1373.44 | 0        | 0        | yes |
| Flagellar biosynthesis protein flhF                        | JZ6_10 | JZ6_28 | OK | 52.5143 | 233.508 | 0        | 0        | yes |
| putative cytochrome b561                                   | JZ6_10 | JZ6_28 | OK | 424.132 | 1885.14 | 0        | 0        | yes |
| Phospho-2-dehydro-3-deoxyheptonate aldolase, Phe-sensitive | JZ6_10 | JZ6_28 | OK | 129.731 | 574.809 | 0        | 0        | yes |
| Hypothetical protein                                       | JZ6_10 | JZ6_28 | OK | 35.1931 | 155.651 | 7.65E-09 | 2.49E-08 | yes |

|                                                                             |        |        |    |         |         |          |          |     |
|-----------------------------------------------------------------------------|--------|--------|----|---------|---------|----------|----------|-----|
| transport ATP-binding protein MsbA                                          | JZ6_10 | JZ6_28 | OK | 18.18   | 79.9544 | 5.57E-12 | 2.27E-11 | yes |
| dipeptide/tripeptide permease                                               | JZ6_10 | JZ6_28 | OK | 26.9772 | 117.095 | 9.61E-14 | 4.31E-13 | yes |
| putative cation efflux system component                                     | JZ6_10 | JZ6_28 | OK | 781.121 | 3374.77 | 0        | 0        | yes |
| Hypothetical transcriptional regulator                                      | JZ6_10 | JZ6_28 | OK | 62.7805 | 270.197 | 2.46E-08 | 7.73E-08 | yes |
| Histidinol dehydrogenase                                                    | JZ6_10 | JZ6_28 | OK | 67.8488 | 289.682 | 0        | 0        | yes |
| hypothetical protein                                                        | JZ6_10 | JZ6_28 | OK | 22937.3 | 97145.9 | 7.93E-11 | 2.99E-10 | yes |
| UDP-N-acetylmuramoylalanyl-D-glutamate--2,6-diaminopimelate ligase          | JZ6_10 | JZ6_28 | OK | 11.7132 | 49.5152 | 1.11E-06 | 2.99E-06 | yes |
| NnrS protein                                                                | JZ6_10 | JZ6_28 | OK | 31.392  | 131.87  | 3.75E-12 | 1.54E-11 | yes |
| Cystathionine beta-lyase                                                    | JZ6_10 | JZ6_28 | OK | 27.9498 | 116.43  | 7.40E-11 | 2.79E-10 | yes |
| Chaperone protein DnaJ                                                      | JZ6_10 | JZ6_28 | OK | 143.471 | 596.301 | 0        | 0        | yes |
| Leucyl-tRNA synthetase                                                      | JZ6_10 | JZ6_28 | OK | 81.749  | 337.67  | 0        | 0        | yes |
| Trigger factor                                                              | JZ6_10 | JZ6_28 | OK | 535.73  | 2202.03 | 0        | 0        | yes |
| hypothetical protein                                                        | JZ6_10 | JZ6_28 | OK | 175.098 | 716.751 | 2.44E-15 | 1.20E-14 | yes |
| Cysteine desulfurase                                                        | JZ6_10 | JZ6_28 | OK | 308.143 | 1255.89 | 0        | 0        | yes |
| polar flagellin                                                             | JZ6_10 | JZ6_28 | OK | 34.4578 | 139.5   | 1.07E-13 | 4.80E-13 | yes |
| Na(+)-translocating NADH-quinone reductase subunit C                        | JZ6_10 | JZ6_28 | OK | 333.607 | 1348.98 | 0        | 0        | yes |
| Imidazole glycerol phosphate synthase subunit hisH                          | JZ6_10 | JZ6_28 | OK | 86.079  | 347.626 | 1.44E-12 | 6.06E-12 | yes |
| hypothetical transcriptional regulator, TetR family                         | JZ6_10 | JZ6_28 | OK | 43.5786 | 175.885 | 1.13E-07 | 3.33E-07 | yes |
| NifU-related protein                                                        | JZ6_10 | JZ6_28 | OK | 455.92  | 1833.01 | 0        | 0        | yes |
| chemotaxis protein CheB                                                     | JZ6_10 | JZ6_28 | OK | 30.0581 | 120.767 | 3.17E-10 | 1.14E-09 | yes |
| Hypothetical oxidoreductase                                                 | JZ6_10 | JZ6_28 | OK | 52.2316 | 209.801 | 9.83E-11 | 3.68E-10 | yes |
| Glutamate synthase                                                          | JZ6_10 | JZ6_28 | OK | 20.3558 | 81.7287 | 0        | 0        | yes |
| Redox-sensitive transcriptional activator soxR                              | JZ6_10 | JZ6_28 | OK | 90.0105 | 358.858 | 4.55E-08 | 1.40E-07 | yes |
| Histidine biosynthesis bifunctional protein hisB                            | JZ6_10 | JZ6_28 | OK | 59.1905 | 235.861 | 0        | 0        | yes |
| 3-ketoacyl-CoA thiolase (Fatty acid oxidation complexbeta subunit)          | JZ6_10 | JZ6_28 | OK | 81.5861 | 324.436 | 0        | 0        | yes |
| putative cytochrome b561                                                    | JZ6_10 | JZ6_28 | OK | 615.121 | 2428.42 | 2.22E-16 | 1.15E-15 | yes |
| DctQ, TRAP-type C4-dicarboxylate transport system, large permease component | JZ6_10 | JZ6_28 | OK | 69.0494 | 270.653 | 0        | 0        | yes |
| Glyceraldehyde-3-phosphate dehydrogenase                                    | JZ6_10 | JZ6_28 | OK | 49.3713 | 192.269 | 0        | 0        | yes |
| DnaK-related protein                                                        | JZ6_10 | JZ6_28 | OK | 33.6419 | 130.729 | 0        | 0        | yes |
| Glycerol kinase                                                             | JZ6_10 | JZ6_28 | OK | 38.5067 | 149.26  | 0        | 0        | yes |
| Inositol monophosphate family protein                                       | JZ6_10 | JZ6_28 | OK | 132.299 | 512.728 | 0        | 0        | yes |
| magnesium transporter                                                       | JZ6_10 | JZ6_28 | OK | 36.9785 | 143.196 | 1.33E-14 | 6.29E-14 | yes |

|                                                             |        |        |    |         |         |          |          |     |
|-------------------------------------------------------------|--------|--------|----|---------|---------|----------|----------|-----|
| Cytochrome c-type biogenesis protein ccmF                   | JZ6_10 | JZ6_28 | OK | 50.8073 | 196.71  | 0        | 0        | yes |
| Oxaloacetate decarboxylase beta chain                       | JZ6_10 | JZ6_28 | OK | 39.0471 | 150.891 | 1.17E-12 | 4.95E-12 | yes |
| Succinate dehydrogenase hydrophobic membrane anchor protein | JZ6_10 | JZ6_28 | OK | 599.571 | 2311.38 | 0        | 0        | yes |
| Histidine transport ATP-binding protein hisP                | JZ6_10 | JZ6_28 | OK | 87.6273 | 336.363 | 8.88E-16 | 4.47E-15 | yes |
| Histidinol-phosphate aminotransferase                       | JZ6_10 | JZ6_28 | OK | 35.7737 | 136.676 | 1.32E-10 | 4.91E-10 | yes |
| Flagellar basal body protein FlgB                           | JZ6_10 | JZ6_28 | OK | 1981.57 | 7570.65 | 0        | 0        | yes |
| Conserved hypothetical protein                              | JZ6_10 | JZ6_28 | OK | 89.689  | 341.685 | 1.49E-06 | 3.99E-06 | yes |
| hypothetical protein                                        | JZ6_10 | JZ6_28 | OK | 75.6618 | 288.152 | 5.55E-15 | 2.68E-14 | yes |
| Ferrous iron transport protein B                            | JZ6_10 | JZ6_28 | OK | 22.7773 | 86.3712 | 1.82E-14 | 8.54E-14 | yes |
| penicillin-binding protein 1B                               | JZ6_10 | JZ6_28 | OK | 14.6879 | 55.6137 | 1.04E-10 | 3.90E-10 | yes |
| Serine acetyltransferase                                    | JZ6_10 | JZ6_28 | OK | 119.161 | 450.925 | 0        | 0        | yes |
| putative transcriptional regulator                          | JZ6_10 | JZ6_28 | OK | 25.3763 | 95.1978 | 6.60E-07 | 1.82E-06 | yes |
| Fumarate reductase subunit C                                | JZ6_10 | JZ6_28 | OK | 1058.09 | 3966.87 | 0        | 0        | yes |
| Phosphoenolpyruvate synthase/pyruvate phosphate dikinase    | JZ6_10 | JZ6_28 | OK | 30.4152 | 113.679 | 0        | 0        | yes |
| Na(+)-translocating NADH-quinone reductase subunit B        | JZ6_10 | JZ6_28 | OK | 252.146 | 939.61  | 0        | 0        | yes |
| hypothetical protein                                        | JZ6_10 | JZ6_28 | OK | 38.4453 | 142.948 | 3.51E-06 | 8.97E-06 | yes |
| 3-isopropylmalate dehydratase large subunit                 | JZ6_10 | JZ6_28 | OK | 45.111  | 166.744 | 0        | 0        | yes |
| Tryptophan synthase beta chain                              | JZ6_10 | JZ6_28 | OK | 49.8532 | 184.165 | 2.00E-15 | 9.88E-15 | yes |
| 2-isopropylmalate synthase                                  | JZ6_10 | JZ6_28 | OK | 244.067 | 894.344 | 0        | 0        | yes |
| Flagellar biosynthesis protein flhA                         | JZ6_10 | JZ6_28 | OK | 17.8814 | 65.4049 | 1.09E-10 | 4.07E-10 | yes |
| Fumarate reductase iron-sulfur protein                      | JZ6_10 | JZ6_28 | OK | 588.152 | 2143.47 | 0        | 0        | yes |
| Hypothetical protein                                        | JZ6_10 | JZ6_28 | OK | 331.837 | 1204.86 | 2.68E-07 | 7.66E-07 | yes |
| prolyl-tRNA synthetase                                      | JZ6_10 | JZ6_28 | OK | 87.68   | 316.266 | 0        | 0        | yes |
| acetylornithine deacetylase                                 | JZ6_10 | JZ6_28 | OK | 76.11   | 274.325 | 0        | 0        | yes |
| Homoserine dehydrogenase                                    | JZ6_10 | JZ6_28 | OK | 66.5993 | 238.677 | 0        | 0        | yes |
| Flagellar M-ring protein                                    | JZ6_10 | JZ6_28 | OK | 13.4481 | 47.861  | 8.20E-07 | 2.24E-06 | yes |
| Thioredoxin reductase                                       | JZ6_10 | JZ6_28 | OK | 82.2432 | 292.311 | 0        | 0        | yes |
| Anaerobic nitric oxide reductase transcription regulator    | JZ6_10 | JZ6_28 | OK | 75.1635 | 265.671 | 0        | 0        | yes |
| hypothetical protein                                        | JZ6_10 | JZ6_28 | OK | 21.1497 | 73.4254 | 1.44E-06 | 3.85E-06 | yes |
| Flagellar hook-basal body complex protein fliE              | JZ6_10 | JZ6_28 | OK | 937.703 | 3234.74 | 0        | 0        | yes |
| Glutamate decarboxylase                                     | JZ6_10 | JZ6_28 | OK | 13.6464 | 47.0654 | 2.05E-06 | 5.38E-06 | yes |
| hypothetical protein                                        | JZ6_10 | JZ6_28 | OK | 26.5226 | 89.4811 | 2.08E-09 | 7.04E-09 | yes |

|                                                                   |        |        |    |         |         |          |          |     |
|-------------------------------------------------------------------|--------|--------|----|---------|---------|----------|----------|-----|
| Glycine dehydrogenase (Glycine cleavage system P-protein)         | JZ6_10 | JZ6_28 | OK | 123.87  | 414.437 | 0        | 0        | yes |
| Phosphoserine aminotransferase                                    | JZ6_10 | JZ6_28 | OK | 80.7651 | 269.755 | 0        | 0        | yes |
| Hypothetical protein                                              | JZ6_10 | JZ6_28 | OK | 455.339 | 1520.02 | 0        | 0        | yes |
| Electron transport complex protein RnfC (fragment)                | JZ6_10 | JZ6_28 | OK | 20.7682 | 69.2058 | 2.88E-10 | 1.04E-09 | yes |
| glutamate synthase, large subunit                                 | JZ6_10 | JZ6_28 | OK | 8.5615  | 28.5028 | 2.54E-09 | 8.55E-09 | yes |
| Transcriptional regulator                                         | JZ6_10 | JZ6_28 | OK | 225.883 | 751.888 | 0        | 0        | yes |
| Bifunctional purine biosynthesis protein purH                     | JZ6_10 | JZ6_28 | OK | 63.4492 | 208.81  | 0        | 0        | yes |
| Methylisocitrate lyase                                            | JZ6_10 | JZ6_28 | OK | 32.8685 | 106.817 | 1.19E-06 | 3.21E-06 | yes |
| chloride channel protein EriC                                     | JZ6_10 | JZ6_28 | OK | 28.9434 | 93.8792 | 9.62E-10 | 3.34E-09 | yes |
| Na <sup>+</sup> -driven multidrug efflux pump                     | JZ6_10 | JZ6_28 | OK | 102.58  | 331.023 | 0        | 0        | yes |
| Anaerobic C4-dicarboxylate transporter                            | JZ6_10 | JZ6_28 | OK | 37.0669 | 119.296 | 4.85E-10 | 1.73E-09 | yes |
| Hypothetical ABC transporter ATP-binding protein                  | JZ6_10 | JZ6_28 | OK | 59.5473 | 191.37  | 0        | 0        | yes |
| 3-isopropylmalate dehydratase small subunit                       | JZ6_10 | JZ6_28 | OK | 61.5129 | 197.62  | 4.00E-07 | 1.12E-06 | yes |
| Flagellar motor switch protein fliG                               | JZ6_10 | JZ6_28 | OK | 26.5225 | 85.1288 | 2.42E-06 | 6.31E-06 | yes |
| putative HTH-type transcriptional regulator                       | JZ6_10 | JZ6_28 | OK | 47.9183 | 153.283 | 9.13E-08 | 2.73E-07 | yes |
| Transcriptional regulator                                         | JZ6_10 | JZ6_28 | OK | 33.3396 | 106.31  | 5.12E-07 | 1.43E-06 | yes |
| Fumarate reductase subunit D                                      | JZ6_10 | JZ6_28 | OK | 1186.67 | 3760.94 | 0        | 0        | yes |
| hypothetical protein                                              | JZ6_10 | JZ6_28 | OK | 55.9939 | 175.242 | 8.75E-14 | 3.93E-13 | yes |
| conserved hypothetical protein                                    | JZ6_10 | JZ6_28 | OK | 16.826  | 52.5579 | 7.88E-09 | 2.57E-08 | yes |
| Transketolase                                                     | JZ6_10 | JZ6_28 | OK | 193.734 | 604.476 | 0        | 0        | yes |
| Predicted transcriptional regulator                               | JZ6_10 | JZ6_28 | OK | 432.239 | 1348.09 | 0        | 0        | yes |
| Biosynthetic arginine decarboxylase                               | JZ6_10 | JZ6_28 | OK | 543.431 | 1689.26 | 0        | 0        | yes |
| Cytochrome c-type biogenesis protein                              | JZ6_10 | JZ6_28 | OK | 94.1438 | 292     | 9.50E-07 | 2.58E-06 | yes |
| Transcriptional regulator, LysR family                            | JZ6_10 | JZ6_28 | OK | 54.2077 | 167.988 | 4.14E-09 | 1.37E-08 | yes |
| Cytochrome c oxidase polypeptide I homolog                        | JZ6_10 | JZ6_28 | OK | 208.193 | 640.619 | 0        | 0        | yes |
| Shikimate kinase                                                  | JZ6_10 | JZ6_28 | OK | 659.285 | 2026.43 | 0        | 0        | yes |
| Replicative DNA helicase                                          | JZ6_10 | JZ6_28 | OK | 31.0224 | 95.2743 | 1.27E-08 | 4.07E-08 | yes |
| Na <sup>(+)</sup> -translocating NADH-quinone reductase subunit F | JZ6_10 | JZ6_28 | OK | 222.75  | 683.934 | 0        | 0        | yes |
| ribonuclease E                                                    | JZ6_10 | JZ6_28 | OK | 156.879 | 481.063 | 0        | 0        | yes |
| Chemotaxis protein CheZ                                           | JZ6_10 | JZ6_28 | OK | 321.166 | 977.867 | 0        | 0        | yes |
| hypothetical protein                                              | JZ6_10 | JZ6_28 | OK | 4350.51 | 13220.6 | 3.63E-10 | 1.30E-09 | yes |
| Ribosomal protein L2                                              | JZ6_10 | JZ6_28 | OK | 644.857 | 1954.06 | 0        | 0        | yes |

|                                                          |        |        |    |         |         |          |          |     |
|----------------------------------------------------------|--------|--------|----|---------|---------|----------|----------|-----|
| DNA helicase II                                          | JZ6_10 | JZ6_28 | OK | 47.3064 | 143.061 | 0        | 0        | yes |
| tyrosyl-tRNA synthetase                                  | JZ6_10 | JZ6_28 | OK | 123.906 | 374.084 | 0        | 0        | yes |
| transcriptional regulator                                | JZ6_10 | JZ6_28 | OK | 101.616 | 304.832 | 1.11E-10 | 4.15E-10 | yes |
| Fatty oxidation complex, alpha subunit                   | JZ6_10 | JZ6_28 | OK | 118.744 | 355.057 | 0        | 0        | yes |
| Nuclease sbcCD subunit C                                 | JZ6_10 | JZ6_28 | OK | 26.5802 | 79.4531 | 0        | 0        | yes |
| DNA polymerase I                                         | JZ6_10 | JZ6_28 | OK | 28.8312 | 86.1723 | 6.66E-16 | 3.37E-15 | yes |
| 1-(5-phosphoribosyl)-5-putative peptidase                | JZ6_10 | JZ6_28 | OK | 45.6841 | 135.229 | 1.11E-15 | 5.56E-15 | yes |
| hypothetical permease                                    | JZ6_10 | JZ6_28 | OK | 22.3304 | 65.8286 | 8.06E-11 | 3.03E-10 | yes |
| Proline dehydrogenase                                    | JZ6_10 | JZ6_28 | OK | 96.9406 | 284.986 | 0        | 0        | yes |
| Extracellular solute-binding protein, family 7           | JZ6_10 | JZ6_28 | OK | 257.664 | 752.891 | 0        | 0        | yes |
| Na(+)-translocating NADH-quinone reductase subunit D     | JZ6_10 | JZ6_28 | OK | 722.038 | 2052.21 | 0        | 0        | yes |
| hypothetical protein                                     | JZ6_10 | JZ6_28 | OK | 677.555 | 1917.27 | 0        | 0        | yes |
| Aspartate aminotransferase                               | JZ6_10 | JZ6_28 | OK | 215.007 | 607.385 | 0        | 0        | yes |
| Methyl-accepting chemotaxis protein                      | JZ6_10 | JZ6_28 | OK | 28.4657 | 80.4041 | 2.01E-09 | 6.85E-09 | yes |
| Phosphoribosylaminoimidazole-succinocarboxamide synthase | JZ6_10 | JZ6_28 | OK | 64.1184 | 180.645 | 1.69E-11 | 6.66E-11 | yes |
| conserved hypothetical protein                           | JZ6_10 | JZ6_28 | OK | 43.5119 | 122.244 | 3.20E-08 | 9.93E-08 | yes |
| ATP synthase delta chain                                 | JZ6_10 | JZ6_28 | OK | 757.763 | 2124.96 | 0        | 0        | yes |
| Hypothetical M22 peptidase homolog yeaZ                  | JZ6_10 | JZ6_28 | OK | 81.4083 | 227.989 | 2.93E-08 | 9.14E-08 | yes |
| Na(+)-translocating NADH-quinone reductase subunit E     | JZ6_10 | JZ6_28 | OK | 351.615 | 981.641 | 0        | 0        | yes |
| Flagellar hook capping protein FlgD                      | JZ6_10 | JZ6_28 | OK | 804.725 | 2245.31 | 0        | 0        | yes |
| Conserved hypothetical protein                           | JZ6_10 | JZ6_28 | OK | 27.9496 | 77.958  | 8.31E-07 | 2.27E-06 | yes |
| 1;4-alpha-glucan branching enzyme                        | JZ6_10 | JZ6_28 | OK | 78.1724 | 217.19  | 0        | 0        | yes |
| putative Penicillin-binding protein                      | JZ6_10 | JZ6_28 | OK | 223.309 | 619.753 | 0        | 0        | yes |
| ABC-type sugar transport system, ATP-binding protein     | JZ6_10 | JZ6_28 | OK | 42.5264 | 117.752 | 2.24E-07 | 6.45E-07 | yes |
| GMP synthase                                             | JZ6_10 | JZ6_28 | OK | 81.7146 | 225.789 | 0        | 0        | yes |
| phosphoenolpyruvate carboxylase                          | JZ6_10 | JZ6_28 | OK | 26.8689 | 74.1732 | 2.94E-12 | 1.21E-11 | yes |
| isopenicillin N synthase                                 | JZ6_10 | JZ6_28 | OK | 85.8604 | 235.906 | 1.21E-10 | 4.50E-10 | yes |
| conserved hypothetical protein                           | JZ6_10 | JZ6_28 | OK | 101.418 | 278.487 | 3.84E-06 | 9.79E-06 | yes |
| Glutamate synthase                                       | JZ6_10 | JZ6_28 | OK | 54.7663 | 150.038 | 3.66E-12 | 1.50E-11 | yes |
| Sodium/proline symporter                                 | JZ6_10 | JZ6_28 | OK | 144.449 | 395.349 | 0        | 0        | yes |
| Preprotein translocase subunit SecF                      | JZ6_10 | JZ6_28 | OK | 188.15  | 510.947 | 0        | 0        | yes |

|                                                          |        |        |    |         |         |          |          |     |
|----------------------------------------------------------|--------|--------|----|---------|---------|----------|----------|-----|
| Exodeoxyribonuclease V gamma chain                       | JZ6_10 | JZ6_28 | OK | 24.422  | 66.1851 | 4.64E-14 | 2.12E-13 | yes |
| Guanosine-5'-triphosphate,3'-diphosphate pyrophosphatase | JZ6_10 | JZ6_28 | OK | 74.8926 | 202.178 | 2.22E-16 | 1.15E-15 | yes |
| Chromosome partition protein mukB                        | JZ6_10 | JZ6_28 | OK | 18.0082 | 48.5996 | 2.53E-13 | 1.11E-12 | yes |
| Flagellar hook protein flgE                              | JZ6_10 | JZ6_28 | OK | 315.942 | 844.807 | 0        | 0        | yes |
| Succinyl-CoA synthetase beta chain                       | JZ6_10 | JZ6_28 | OK | 204.742 | 546.835 | 0        | 0        | yes |
| Hypothetical protein                                     | JZ6_10 | JZ6_28 | OK | 34.8466 | 92.7927 | 2.89E-15 | 1.41E-14 | yes |
| Shikimate dehydrogenase                                  | JZ6_10 | JZ6_28 | OK | 95.2912 | 251.036 | 3.45E-10 | 1.24E-09 | yes |
| HesB family protein                                      | JZ6_10 | JZ6_28 | OK | 786.306 | 2056.15 | 1.78E-15 | 8.80E-15 | yes |
| Phosphoglucomutase                                       | JZ6_10 | JZ6_28 | OK | 109.503 | 285.981 | 0        | 0        | yes |
| Ribosomal protein S19                                    | JZ6_10 | JZ6_28 | OK | 1218.8  | 3179.05 | 1.55E-15 | 7.72E-15 | yes |
| Conserved hypothetical protein                           | JZ6_10 | JZ6_28 | OK | 95.815  | 249.019 | 3.22E-14 | 1.49E-13 | yes |
| Co-chaperone protein hscB homolog                        | JZ6_10 | JZ6_28 | OK | 120.045 | 311.592 | 3.77E-07 | 1.06E-06 | yes |
| Serine hydroxymethyltransferase 1                        | JZ6_10 | JZ6_28 | OK | 146.748 | 380.898 | 0        | 0        | yes |
| Malate synthase                                          | JZ6_10 | JZ6_28 | OK | 106.776 | 274.276 | 1.89E-07 | 5.49E-07 | yes |
| Hypothetical protein                                     | JZ6_10 | JZ6_28 | OK | 735.592 | 1889.44 | 1.43E-06 | 3.82E-06 | yes |
| ATP synthase alpha chain                                 | JZ6_10 | JZ6_28 | OK | 528.714 | 1357.65 | 0        | 0        | yes |
| Chemotaxis protein cheA                                  | JZ6_10 | JZ6_28 | OK | 31.7122 | 81.3412 | 5.85E-10 | 2.07E-09 | yes |
| HSP70 molecular chaperone HscA                           | JZ6_10 | JZ6_28 | OK | 29.272  | 74.2315 | 7.29E-08 | 2.20E-07 | yes |
| FolC bifunctional protein                                | JZ6_10 | JZ6_28 | OK | 38.9177 | 98.6779 | 4.74E-07 | 1.32E-06 | yes |
| Probable aminotransferase yfbQ                           | JZ6_10 | JZ6_28 | OK | 50.4131 | 126.818 | 4.44E-08 | 1.36E-07 | yes |
| hypothetical protein                                     | JZ6_10 | JZ6_28 | OK | 79.0357 | 198.11  | 4.15E-07 | 1.16E-06 | yes |
| Na <sup>+</sup> /H <sup>+</sup> -exchanging protein      | JZ6_10 | JZ6_28 | OK | 60.6168 | 151.906 | 4.03E-12 | 1.65E-11 | yes |
| Ribosomal protein S6 modification protein                | JZ6_10 | JZ6_28 | OK | 2779.66 | 6958.11 | 0        | 0        | yes |
| anthranilate synthase alpha subunit                      | JZ6_10 | JZ6_28 | OK | 31.9754 | 79.6679 | 3.77E-07 | 1.06E-06 | yes |
| Prolyl 4-hydroxylase alpha subunit homologue             | JZ6_10 | JZ6_28 | OK | 218.039 | 542.227 | 2.79E-13 | 1.22E-12 | yes |
| A/G-specific adenine glycosylase                         | JZ6_10 | JZ6_28 | OK | 57.0357 | 141.676 | 9.12E-08 | 2.73E-07 | yes |
| HemY protein                                             | JZ6_10 | JZ6_28 | OK | 108.336 | 267.833 | 7.33E-15 | 3.51E-14 | yes |
| Protein export chaperon                                  | JZ6_10 | JZ6_28 | OK | 933.821 | 2291.48 | 0        | 0        | yes |
| Imidazole glycerol phosphate synthase subunit hisF1      | JZ6_10 | JZ6_28 | OK | 122.025 | 298.931 | 1.72E-09 | 5.89E-09 | yes |
| Citrate synthase                                         | JZ6_10 | JZ6_28 | OK | 650.67  | 1585.45 | 0        | 0        | yes |
| Asparagine synthetase B, glutamine-hydrolyzing           | JZ6_10 | JZ6_28 | OK | 73.9122 | 179.789 | 1.87E-14 | 8.74E-14 | yes |
| Alanyl-tRNA synthetase                                   | JZ6_10 | JZ6_28 | OK | 95.6207 | 232.34  | 0        | 0        | yes |

|                                                                            |        |        |    |         |         |          |          |     |
|----------------------------------------------------------------------------|--------|--------|----|---------|---------|----------|----------|-----|
| Ribosomal protein L23                                                      | JZ6_10 | JZ6_28 | OK | 1928.79 | 4634.92 | 0        | 0        | yes |
| Recombination protein recR                                                 | JZ6_10 | JZ6_28 | OK | 185.239 | 444.326 | 3.87E-10 | 1.39E-09 | yes |
| 3-hydroxyisobutyrate dehydrogenase and related beta-hydroxyacid dehydrogen | JZ6_10 | JZ6_28 | OK | 70.9051 | 169.923 | 4.56E-07 | 1.28E-06 | yes |
| Protein grpE (HSP-70 cofactor)                                             | JZ6_10 | JZ6_28 | OK | 309.826 | 738.444 | 5.00E-14 | 2.28E-13 | yes |
| Membrane protein                                                           | JZ6_10 | JZ6_28 | OK | 1060.73 | 2527.46 | 0        | 0        | yes |
| Pyrroline-5-carboxylate reductase                                          | JZ6_10 | JZ6_28 | OK | 67.823  | 161.284 | 3.75E-06 | 9.56E-06 | yes |
| Hypothetical protein                                                       | JZ6_10 | JZ6_28 | OK | 85.2496 | 200.786 | 1.49E-06 | 3.96E-06 | yes |
| Transketolase 1                                                            | JZ6_10 | JZ6_28 | OK | 221.257 | 519.535 | 0        | 0        | yes |
| 3;4-dihydroxy-2-butanone 4-phosphate synthase                              | JZ6_10 | JZ6_28 | OK | 108.587 | 254.859 | 5.05E-07 | 1.41E-06 | yes |
| Exodeoxyribonuclease V beta chain                                          | JZ6_10 | JZ6_28 | OK | 15.8344 | 37.1421 | 2.30E-07 | 6.62E-07 | yes |
| Phosphoribosylaminoimidazole carboxylase ATPase subunit                    | JZ6_10 | JZ6_28 | OK | 48.3067 | 113.238 | 2.08E-06 | 5.45E-06 | yes |
| Malate synthase domain protein                                             | JZ6_10 | JZ6_28 | OK | 514.648 | 1197.54 | 0        | 0        | yes |
| Aspartate-semialdehyde dehydrogenase                                       | JZ6_10 | JZ6_28 | OK | 211.837 | 491.811 | 0        | 0        | yes |
| Isoleucyl-tRNA synthetase                                                  | JZ6_10 | JZ6_28 | OK | 140.827 | 326.322 | 0        | 0        | yes |
| Octaprenyl-diphosphate synthase                                            | JZ6_10 | JZ6_28 | OK | 144.565 | 332.856 | 7.35E-14 | 3.32E-13 | yes |
| Transcriptional regulator, AraC family                                     | JZ6_10 | JZ6_28 | OK | 99.8424 | 229.135 | 1.69E-08 | 5.37E-08 | yes |
| Hemolysin III                                                              | JZ6_10 | JZ6_28 | OK | 337.17  | 767.72  | 2.22E-16 | 1.15E-15 | yes |
| ribosomal protein L6                                                       | JZ6_10 | JZ6_28 | OK | 1121.27 | 2542.87 | 0        | 0        | yes |
| Hypothetical protein                                                       | JZ6_10 | JZ6_28 | OK | 1217.05 | 2749.56 | 2.44E-06 | 6.35E-06 | yes |
| putative methyltransferase                                                 | JZ6_10 | JZ6_28 | OK | 301.383 | 680.272 | 4.45E-13 | 1.93E-12 | yes |
| sodium-dependent transporter                                               | JZ6_10 | JZ6_28 | OK | 85.2107 | 192.265 | 5.43E-11 | 2.07E-10 | yes |
| 2-octaprenyl-6-methoxyphenol hydroxylase                                   | JZ6_10 | JZ6_28 | OK | 63.9101 | 144.111 | 2.58E-07 | 7.37E-07 | yes |
| glycine cleavage system T protein                                          | JZ6_10 | JZ6_28 | OK | 112.522 | 253.6   | 5.34E-12 | 2.18E-11 | yes |
| Anaerobic C4-dicarboxylate transporter dcuA                                | JZ6_10 | JZ6_28 | OK | 487.789 | 1098.27 | 0        | 0        | yes |
| putative ATPase                                                            | JZ6_10 | JZ6_28 | OK | 57.6931 | 129.843 | 3.35E-09 | 1.12E-08 | yes |
| hypothetical protein                                                       | JZ6_10 | JZ6_28 | OK | 2109.27 | 4740.84 | 3.51E-14 | 1.62E-13 | yes |
| putative cold shock protein                                                | JZ6_10 | JZ6_28 | OK | 15978.2 | 35904.1 | 0        | 0        | yes |
| Succinyl-CoA synthetase alpha chain                                        | JZ6_10 | JZ6_28 | OK | 407.019 | 914.538 | 0        | 0        | yes |
| Hypothetical acetyltransferase                                             | JZ6_10 | JZ6_28 | OK | 237.883 | 533.911 | 5.03E-08 | 1.54E-07 | yes |
| Transcriptional regulator, LysR family                                     | JZ6_10 | JZ6_28 | OK | 261.829 | 584.282 | 0        | 0        | yes |
| Oxaloacetate decarboxylase alpha chain                                     | JZ6_10 | JZ6_28 | OK | 124.86  | 277.582 | 0        | 0        | yes |
| Ribosomal protein L30                                                      | JZ6_10 | JZ6_28 | OK | 2957.12 | 6573.71 | 2.28E-10 | 8.32E-10 | yes |

|                                                          |        |        |    |         |         |          |          |     |
|----------------------------------------------------------|--------|--------|----|---------|---------|----------|----------|-----|
| Permease family protein                                  | JZ6_10 | JZ6_28 | OK | 67.922  | 150.838 | 1.99E-08 | 6.27E-08 | yes |
| ParA family protein                                      | JZ6_10 | JZ6_28 | OK | 112.34  | 249.156 | 1.98E-12 | 8.28E-12 | yes |
| Flagellin C                                              | JZ6_10 | JZ6_28 | OK | 99.3729 | 220.243 | 4.42E-10 | 1.58E-09 | yes |
| Phosphoenolpyruvate-protein phosphotransferase ptsP      | JZ6_10 | JZ6_28 | OK | 111.478 | 246.649 | 0        | 0        | yes |
| hypothetical protein                                     | JZ6_10 | JZ6_28 | OK | 5710.2  | 12608.4 | 0        | 0        | yes |
| cytidine deaminase                                       | JZ6_10 | JZ6_28 | OK | 129.082 | 284.943 | 5.40E-10 | 1.91E-09 | yes |
| hypothetical protein                                     | JZ6_10 | JZ6_28 | OK | 45.6285 | 100.658 | 2.89E-10 | 1.05E-09 | yes |
| chemotaxis protein CheY                                  | JZ6_10 | JZ6_28 | OK | 427.11  | 940.384 | 5.43E-08 | 1.65E-07 | yes |
| Phosphoribosylformylglycinamide synthase                 | JZ6_10 | JZ6_28 | OK | 72.7189 | 159.17  | 0        | 0        | yes |
| ATP synthase B chain                                     | JZ6_10 | JZ6_28 | OK | 1586.28 | 3468.04 | 0        | 0        | yes |
| Threonine dehydratase                                    | JZ6_10 | JZ6_28 | OK | 75.4577 | 164.926 | 1.71E-10 | 6.30E-10 | yes |
| putative ribosomal RNA small subunit methyltransferase D | JZ6_10 | JZ6_28 | OK | 70.7785 | 154.671 | 4.64E-07 | 1.30E-06 | yes |
| Gamma-glutamyl phosphate reductase                       | JZ6_10 | JZ6_28 | OK | 57.3746 | 125.283 | 8.99E-07 | 2.45E-06 | yes |
| Glutaminyl-tRNA synthetase                               | JZ6_10 | JZ6_28 | OK | 442.711 | 965.655 | 0        | 0        | yes |
| hypothetical protein                                     | JZ6_10 | JZ6_28 | OK | 7389.66 | 16114.4 | 0        | 0        | yes |
| NADP-dependent malic enzyme                              | JZ6_10 | JZ6_28 | OK | 107.609 | 234.302 | 1.63E-11 | 6.44E-11 | yes |
| Topoisomerase IV subunit A                               | JZ6_10 | JZ6_28 | OK | 72.1869 | 156.485 | 3.75E-14 | 1.73E-13 | yes |
| DNA gyrase, subunit A                                    | JZ6_10 | JZ6_28 | OK | 340.822 | 738.651 | 0        | 0        | yes |
| Threonine synthase                                       | JZ6_10 | JZ6_28 | OK | 83.8424 | 181.513 | 1.59E-09 | 5.46E-09 | yes |
| 3-deoxy-manno-octulosonate cytidyltransferase            | JZ6_10 | JZ6_28 | OK | 108.628 | 235.116 | 1.19E-06 | 3.21E-06 | yes |
| Glycerol-3-phosphate dehydrogenase (NAD+)                | JZ6_10 | JZ6_28 | OK | 64.081  | 137.686 | 2.07E-06 | 5.43E-06 | yes |
| PhoH-like protein                                        | JZ6_10 | JZ6_28 | OK | 142.284 | 305.395 | 9.87E-13 | 4.19E-12 | yes |
| Probable exodeoxyribonuclease VII small subunit          | JZ6_10 | JZ6_28 | OK | 1406.9  | 2992.13 | 1.80E-07 | 5.23E-07 | yes |
| Aminopeptidase P                                         | JZ6_10 | JZ6_28 | OK | 61.1196 | 129.436 | 1.20E-09 | 4.13E-09 | yes |
| glyoxylase II family protein                             | JZ6_10 | JZ6_28 | OK | 192.245 | 406.308 | 3.74E-08 | 1.15E-07 | yes |
| ATP synthase beta chain                                  | JZ6_10 | JZ6_28 | OK | 1414.36 | 2986.94 | 0        | 0        | yes |
| tryptophanyl-tRNA synthetase                             | JZ6_10 | JZ6_28 | OK | 437.679 | 924.198 | 0        | 0        | yes |
| Chromosomal replication initiator protein dnaA           | JZ6_10 | JZ6_28 | OK | 163.934 | 345.795 | 2.22E-16 | 1.15E-15 | yes |
| Ribosomal protein L4                                     | JZ6_10 | JZ6_28 | OK | 787.296 | 1642.33 | 0        | 0        | yes |
| Hypothetical protein                                     | JZ6_10 | JZ6_28 | OK | 172.207 | 358.754 | 2.18E-09 | 7.38E-09 | yes |
| signal transduction histidine kinase                     | JZ6_10 | JZ6_28 | OK | 76.8082 | 157.556 | 2.57E-08 | 8.05E-08 | yes |
| ATP-dependent Lon protease                               | JZ6_10 | JZ6_28 | OK | 171.182 | 350.652 | 0        | 0        | yes |



|                                                                               |        |        |    |         |         |          |          |     |
|-------------------------------------------------------------------------------|--------|--------|----|---------|---------|----------|----------|-----|
| RctB protein                                                                  | JZ6_10 | JZ6_28 | OK | 68.0998 | 138.401 | 3.12E-10 | 1.13E-09 | yes |
| Inosine-5'-monophosphate dehydrogenase                                        | JZ6_10 | JZ6_28 | OK | 215.868 | 434.241 | 0        | 0        | yes |
| Conserved hypothetical protein                                                | JZ6_10 | JZ6_28 | OK | 36.3711 | 67.207  | 9.66E-08 | 2.88E-07 | yes |
| Pyridoxal phosphate biosynthetic protein pdxJ                                 | JZ6_10 | JZ6_28 | OK | 546.846 | 272.824 | 2.46E-11 | 9.61E-11 | yes |
| ABC transporter: Substrate-binding protein precursor; Maltooligosaccharides u | JZ6_10 | JZ6_28 | OK | 266.587 | 132.424 | 1.21E-10 | 4.51E-10 | yes |
| putative ribosomal protein L7/L12                                             | JZ6_10 | JZ6_28 | OK | 6530.62 | 3237.58 | 0        | 0        | yes |
| DNA-binding protein HU-beta                                                   | JZ6_10 | JZ6_28 | OK | 9129.82 | 4524.68 | 0        | 0        | yes |
| Acetyl-coenzyme A carboxylase carboxyl transferase subunit alpha              | JZ6_10 | JZ6_28 | OK | 1057.4  | 523.117 | 0        | 0        | yes |
| hypothetical protein                                                          | JZ6_10 | JZ6_28 | OK | 3794.9  | 1873.71 | 0        | 0        | yes |
| 3-oxoacyl-                                                                    | JZ6_10 | JZ6_28 | OK | 417.602 | 206.033 | 2.22E-16 | 1.15E-15 | yes |
| Antioxidant, AhpC/Tsa family                                                  | JZ6_10 | JZ6_28 | OK | 5258    | 2588.51 | 0        | 0        | yes |
| Conserved hypothetical protein                                                | JZ6_10 | JZ6_28 | OK | 20069   | 9845.12 | 4.10E-08 | 1.26E-07 | yes |
| Hypothetical protein                                                          | JZ6_10 | JZ6_28 | OK | 7122.06 | 3472.04 | 3.92E-13 | 1.70E-12 | yes |
| aminotransferase, class II/CqsA                                               | JZ6_10 | JZ6_28 | OK | 22.805  | #DIV/0! | 1.69E-06 | 4.48E-06 | yes |
| putative GTP cyclohydrolase II                                                | JZ6_10 | JZ6_28 | OK | 438.15  | 213.518 | 8.75E-07 | 2.38E-06 | yes |
| Peptidyl-prolyl cis-trans isomerase B                                         | JZ6_10 | JZ6_28 | OK | 2058.96 | 1002.24 | 0        | 0        | yes |
| Conserved hypothetical protein                                                | JZ6_10 | JZ6_28 | OK | 69.0543 | 33.5869 | 0        | 0        | yes |
| putative factor-for-inversion stimulation protein                             | JZ6_10 | JZ6_28 | OK | 1637.13 | 795.165 | 1.04E-07 | 3.09E-07 | yes |
| DNA topoisomerase I                                                           | JZ6_10 | JZ6_28 | OK | 492.603 | 238.715 | 0        | 0        | yes |
| Transcriptional regulator                                                     | JZ6_10 | JZ6_28 | OK | 693.87  | 333.612 | 3.35E-06 | 8.59E-06 | yes |
| ABC transporter: Substrate binding protein precursor                          | JZ6_10 | JZ6_28 | OK | 460.395 | 220.856 | 5.18E-11 | 1.97E-10 | yes |
| RNA polymerase sigma factor rpoD (Sigma-70)                                   | JZ6_10 | JZ6_28 | OK | 2816.38 | 1345.16 | 0        | 0        | yes |
| Inner membrane protein                                                        | JZ6_10 | JZ6_28 | OK | 2186.89 | 1038.13 | 0        | 0        | yes |
| Aspartate carbamoyltransferase, catalytic chain                               | JZ6_10 | JZ6_28 | OK | 310.139 | 146.774 | 1.26E-10 | 4.68E-10 | yes |
| conserved hypothetical protein                                                | JZ6_10 | JZ6_28 | OK | 2716.36 | 1283.46 | 0        | 0        | yes |
| putative anti-sigma B factor antagonist                                       | JZ6_10 | JZ6_28 | OK | 1233.53 | 581.573 | 1.39E-06 | 3.71E-06 | yes |
| hypothetical protein                                                          | JZ6_10 | JZ6_28 | OK | 8637.95 | 4071.31 | 0        | 0        | yes |
| DNA-directed RNA polymerase beta' chain                                       | JZ6_10 | JZ6_28 | OK | 937.593 | 440.802 | 0        | 0        | yes |
| hypothetical protein                                                          | JZ6_10 | JZ6_28 | OK | 4565.85 | 2144.08 | 0        | 0        | yes |
| Hypothetical protein                                                          | JZ6_10 | JZ6_28 | OK | 1229.62 | 576.7   | 0        | 0        | yes |
| Phosphoenolpyruvate-protein phosphotransferase                                | JZ6_10 | JZ6_28 | OK | 770.707 | 359.023 | 0        | 0        | yes |
| Flavodoxin                                                                    | JZ6_10 | JZ6_28 | OK | 2461.58 | 1141.69 | 0        | 0        | yes |

|                                                             |        |        |    |         |         |          |          |     |
|-------------------------------------------------------------|--------|--------|----|---------|---------|----------|----------|-----|
| Transcriptional regulatory protein                          | JZ6_10 | JZ6_28 | OK | 157.778 | 72.8779 | 1.50E-07 | 4.39E-07 | yes |
| Endonuclease III                                            | JZ6_10 | JZ6_28 | OK | 298.496 | 137.8   | 1.05E-06 | 2.84E-06 | yes |
| AsmA protein                                                | JZ6_10 | JZ6_28 | OK | 292.82  | 135.026 | 0        | 0        | yes |
| hypothetical protein                                        | JZ6_10 | JZ6_28 | OK | 1715.25 | 787.599 | 6.49E-09 | 2.13E-08 | yes |
| hypothetical protein                                        | JZ6_10 | JZ6_28 | OK | 758.215 | 348.047 | 2.11E-06 | 5.54E-06 | yes |
| Protein flaG                                                | JZ6_10 | JZ6_28 | OK | 1213.05 | 555.667 | 3.57E-12 | 1.47E-11 | yes |
| hypothetical protein                                        | JZ6_10 | JZ6_28 | OK | 762.706 | 347.534 | 5.56E-13 | 2.40E-12 | yes |
| ABC transporter: Transmembrane and ATP-binding protein      | JZ6_10 | JZ6_28 | OK | 136.434 | 62.1462 | 9.82E-13 | 4.17E-12 | yes |
| 7-cyano-7-deazaguanine reductase                            | JZ6_10 | JZ6_28 | OK | 297.862 | 135.404 | 1.56E-09 | 5.35E-09 | yes |
| 50S ribosomal protein L29                                   | JZ6_10 | JZ6_28 | OK | 32934.6 | 14939.7 | 0        | 0        | yes |
| Hypothetical protein                                        | JZ6_10 | JZ6_28 | OK | 19176.9 | 8674.29 | 0        | 0        | yes |
| Thioredoxin                                                 | JZ6_10 | JZ6_28 | OK | 7303.67 | 3292.32 | 0        | 0        | yes |
| CTP synthase (UTP--ammonia ligase)                          | JZ6_10 | JZ6_28 | OK | 2580.64 | 1159.54 | 0        | 0        | yes |
| purine nucleoside phosphorylase                             | JZ6_10 | JZ6_28 | OK | 1074.99 | 482.591 | 0        | 0        | yes |
| UDP-N-acetylglucosamine 1-carboxyvinyltransferase           | JZ6_10 | JZ6_28 | OK | 835.671 | 375.028 | 0        | 0        | yes |
| putative regulatory protein                                 | JZ6_10 | JZ6_28 | OK | 877.894 | 393.881 | 1.43E-06 | 3.83E-06 | yes |
| ABC transporter: Substrate binding protein precursor        | JZ6_10 | JZ6_28 | OK | 301.035 | 134.863 | 6.16E-10 | 2.17E-09 | yes |
| Alanine dehydrogenase                                       | JZ6_10 | JZ6_28 | OK | 5806.39 | 2598.19 | 0        | 0        | yes |
| Peptidase B                                                 | JZ6_10 | JZ6_28 | OK | 478.422 | 213.966 | 0        | 0        | yes |
| 2-dehydro-3-deoxyphosphooctonate aldolase                   | JZ6_10 | JZ6_28 | OK | 292.245 | 130.396 | 1.60E-09 | 5.48E-09 | yes |
| Spermidine/putrescine-binding periplasmic protein precursor | JZ6_10 | JZ6_28 | OK | 346.531 | 154.267 | 5.55E-15 | 2.68E-14 | yes |
| Glutaredoxin                                                | JZ6_10 | JZ6_28 | OK | 489.549 | 217.591 | 4.00E-10 | 1.43E-09 | yes |
| Nitrogen regulatory protein P-II                            | JZ6_10 | JZ6_28 | OK | 4301.29 | 1906.74 | 0        | 0        | yes |
| 3-hydroxydecanoyl-                                          | JZ6_10 | JZ6_28 | OK | 692.704 | 306.658 | 4.81E-11 | 1.84E-10 | yes |
| putative peptidase                                          | JZ6_10 | JZ6_28 | OK | 229.479 | 101.536 | 2.58E-13 | 1.13E-12 | yes |
| Conserved hypothetical protein                              | JZ6_10 | JZ6_28 | OK | 197.634 | 87.0429 | 8.17E-08 | 2.45E-07 | yes |
| CreA protein                                                | JZ6_10 | JZ6_28 | OK | 812.393 | 357.606 | 2.83E-11 | 1.10E-10 | yes |
| Biotin carboxylase                                          | JZ6_10 | JZ6_28 | OK | 220.261 | 96.6051 | 4.04E-12 | 1.66E-11 | yes |
| UDP-N-acetylmuramate-alanine ligase                         | JZ6_10 | JZ6_28 | OK | 283.009 | 124.107 | 0        | 0        | yes |
| Conserved hypothetical protein                              | JZ6_10 | JZ6_28 | OK | 513.003 | 223.769 | 0        | 0        | yes |
| Protease degQ precursor                                     | JZ6_10 | JZ6_28 | OK | 275.793 | 120.282 | 1.11E-15 | 5.56E-15 | yes |
| 6-phosphogluconate dehydrogenase                            | JZ6_10 | JZ6_28 | OK | 598.654 | 261.023 | 0        | 0        | yes |

|                                                    |        |        |    |         |         |          |          |     |
|----------------------------------------------------|--------|--------|----|---------|---------|----------|----------|-----|
| PTS system, glucose-specific IIBC component        | JZ6_10 | JZ6_28 | OK | 2731.61 | 1189.92 | 0        | 0        | yes |
| Sugar fermentation stimulation protein homolog     | JZ6_10 | JZ6_28 | OK | 481.492 | 209.74  | 8.97E-14 | 4.03E-13 | yes |
| Ribonuclease D                                     | JZ6_10 | JZ6_28 | OK | 472.136 | 205.215 | 0        | 0        | yes |
| 50S ribosomal subunit protein L36                  | JZ6_10 | JZ6_28 | OK | 44760.5 | 19380.3 | 5.21E-08 | 1.59E-07 | yes |
| Ferric uptake regulation protein                   | JZ6_10 | JZ6_28 | OK | 4951.12 | 2137.8  | 0        | 0        | yes |
| hypothetical arginine repressor                    | JZ6_10 | JZ6_28 | OK | 594.904 | 256.803 | 4.57E-10 | 1.63E-09 | yes |
| hypothetical translation factor                    | JZ6_10 | JZ6_28 | OK | 598.245 | 258.229 | 1.57E-12 | 6.60E-12 | yes |
| Elongation factor P                                | JZ6_10 | JZ6_28 | OK | 2701.38 | 1162.91 | 0        | 0        | yes |
| FkpA protein                                       | JZ6_10 | JZ6_28 | OK | 2366.07 | 1016.74 | 0        | 0        | yes |
| sigma-E factor negative regulatory protein RseA    | JZ6_10 | JZ6_28 | OK | 3548.13 | 1515.54 | 0        | 0        | yes |
| GTP cyclohydrolase-2                               | JZ6_10 | JZ6_28 | OK | 624.045 | 266.33  | 1.81E-13 | 7.98E-13 | yes |
| Oxidoreductase, aldo/keto reductase 2 family       | JZ6_10 | JZ6_28 | OK | 319.925 | 136.416 | 1.82E-12 | 7.62E-12 | yes |
| serine hydroxymethyltransferase                    | JZ6_10 | JZ6_28 | OK | 1049.68 | 447.394 | 0        | 0        | yes |
| Peptide methionine sulfoxide reductase msrB        | JZ6_10 | JZ6_28 | OK | 3993.64 | 1701.95 | 0        | 0        | yes |
| DNA repair protein recO                            | JZ6_10 | JZ6_28 | OK | 209.902 | 89.2639 | 2.91E-06 | 7.50E-06 | yes |
| ribosomal protein L34                              | JZ6_10 | JZ6_28 | OK | 28074.3 | 11935.2 | 2.17E-11 | 8.50E-11 | yes |
| transcription antitermination protein NusG         | JZ6_10 | JZ6_28 | OK | 3981.53 | 1678.69 | 0        | 0        | yes |
| Multidrug resistance protein                       | JZ6_10 | JZ6_28 | OK | 225.85  | 95.0967 | 2.22E-11 | 8.70E-11 | yes |
| putative outer membrane protein                    | JZ6_10 | JZ6_28 | OK | 417.581 | 175.471 | 3.87E-06 | 9.86E-06 | yes |
| RNA-binding protein Hfq                            | JZ6_10 | JZ6_28 | OK | 2690.22 | 1126.4  | 1.56E-11 | 6.18E-11 | yes |
| sensor histidine kinase/response regulator         | JZ6_10 | JZ6_28 | OK | 60.0667 | 25.0677 | 1.80E-06 | 4.77E-06 | yes |
| Conserved hypothetical protein                     | JZ6_10 | JZ6_28 | OK | 148.502 | 61.8944 | 1.11E-14 | 5.27E-14 | yes |
| 5-carboxymethyl-2-hydroxymuconate isomerase        | JZ6_10 | JZ6_28 | OK | 1092.79 | 453.529 | 1.35E-08 | 4.31E-08 | yes |
| ATP-dependent RNA helicase                         | JZ6_10 | JZ6_28 | OK | 513.101 | 212.869 | 0        | 0        | yes |
| Glycine cleavage system regulatory protein         | JZ6_10 | JZ6_28 | OK | 1337.39 | 554.211 | 0        | 0        | yes |
| Electron transport complex protein rnfE            | JZ6_10 | JZ6_28 | OK | 227.518 | 94.2622 | 2.33E-06 | 6.07E-06 | yes |
| sodium/dicarboxylate symporter                     | JZ6_10 | JZ6_28 | OK | 115.309 | 47.0835 | 8.35E-08 | 2.50E-07 | yes |
| hypothetical protein                               | JZ6_10 | JZ6_28 | OK | 221.251 | 90.295  | 5.14E-08 | 1.56E-07 | yes |
| Hypothetical protein                               | JZ6_10 | JZ6_28 | OK | 393.804 | 159.723 | 7.35E-11 | 2.77E-10 | yes |
| 33 kDa chaperonin (Heat shock protein 33 homolog)  | JZ6_10 | JZ6_28 | OK | 531.486 | 215.106 | 0        | 0        | yes |
| Thiol:disulfide interchange protein dsbA precursor | JZ6_10 | JZ6_28 | OK | 969.386 | 392.1   | 0        | 0        | yes |
| ribosomal subunit interface protein                | JZ6_10 | JZ6_28 | OK | 13015.2 | 5244.69 | 0        | 0        | yes |

|                                                                                   |        |        |    |         |         |          |          |     |
|-----------------------------------------------------------------------------------|--------|--------|----|---------|---------|----------|----------|-----|
| L-threonine 3-dehydrogenase                                                       | JZ6_10 | JZ6_28 | OK | 236.55  | 95.04   | 4.63E-11 | 1.77E-10 | yes |
| Peptidase                                                                         | JZ6_10 | JZ6_28 | OK | 154.888 | 62.1086 | 1.21E-08 | 3.90E-08 | yes |
| Aspartate carbamoyltransferase regulatory chain                                   | JZ6_10 | JZ6_28 | OK | 553.9   | 221.543 | 2.38E-09 | 8.04E-09 | yes |
| HTH-type transcriptional regulator luxR                                           | JZ6_10 | JZ6_28 | OK | 860.788 | 343.366 | 0        | 0        | yes |
| peptide chain release factor 3                                                    | JZ6_10 | JZ6_28 | OK | 288     | 114.75  | 0        | 0        | yes |
| Conserved hypothetical protein                                                    | JZ6_10 | JZ6_28 | OK | 12049.6 | 4800.5  | 2.22E-16 | 1.15E-15 | yes |
| Arginine deiminase                                                                | JZ6_10 | JZ6_28 | OK | 108.164 | 43.0111 | 7.33E-07 | 2.02E-06 | yes |
| SAM-dependent methyltransferase                                                   | JZ6_10 | JZ6_28 | OK | 375.821 | 149.022 | 9.03E-13 | 3.84E-12 | yes |
| Phosphocarrier protein HPr                                                        | JZ6_10 | JZ6_28 | OK | 7150.98 | 2832.27 | 0        | 0        | yes |
| Conserved hypothetical protein                                                    | JZ6_10 | JZ6_28 | OK | 549.07  | 216.732 | 1.05E-08 | 3.39E-08 | yes |
| sigma-E factor regulatory protein RseC                                            | JZ6_10 | JZ6_28 | OK | 694.519 | 273.973 | 1.92E-11 | 7.55E-11 | yes |
| Aminotransferase, CqsA                                                            | JZ6_10 | JZ6_28 | OK | 1141.75 | 446.578 | 0        | 0        | yes |
| putative LuxO repressor protein                                                   | JZ6_10 | JZ6_28 | OK | 146.557 | 56.8924 | 2.35E-11 | 9.18E-11 | yes |
| conserved hypothetical protein                                                    | JZ6_10 | JZ6_28 | OK | 29173.3 | 11277.3 | 0        | 0        | yes |
| Ribosomal-protein-serine acetyltransferase                                        | JZ6_10 | JZ6_28 | OK | 251.112 | 96.8347 | 3.74E-06 | 9.54E-06 | yes |
| Dihydrolipoyllysine-residue acetyltransferase component of pyruvate dehydrogenase | JZ6_10 | JZ6_28 | OK | 195.531 | 75.3145 | 0        | 0        | yes |
| Protein proQ homolog                                                              | JZ6_10 | JZ6_28 | OK | 2851.01 | 1093.95 | 0        | 0        | yes |
| preprotein translocase, SecE subunit                                              | JZ6_10 | JZ6_28 | OK | 11835.6 | 4540.29 | 0        | 0        | yes |
| Response regulator                                                                | JZ6_10 | JZ6_28 | OK | 235.736 | 90.3196 | 1.05E-13 | 4.71E-13 | yes |
| Tail-specific protease precursor                                                  | JZ6_10 | JZ6_28 | OK | 949.648 | 363.524 | 0        | 0        | yes |
| Hypothetical protein                                                              | JZ6_10 | JZ6_28 | OK | 6351.87 | 2427.71 | 4.86E-07 | 1.36E-06 | yes |
| Universal stress protein A                                                        | JZ6_10 | JZ6_28 | OK | 4801.84 | 1830.43 | 0        | 0        | yes |
| hypothetical protein                                                              | JZ6_10 | JZ6_28 | OK | 110.622 | 42.1528 | 1.11E-07 | 3.27E-07 | yes |
| Chitinase                                                                         | JZ6_10 | JZ6_28 | OK | 49.124  | 18.7176 | 8.15E-08 | 2.44E-07 | yes |
| Ribonucleoside-diphosphate reductase 1 alpha subunit                              | JZ6_10 | JZ6_28 | OK | 663.101 | 252.065 | 0        | 0        | yes |
| Formamidopyrimidine-DNA glycosylase                                               | JZ6_10 | JZ6_28 | OK | 318.808 | 120.455 | 1.21E-11 | 4.82E-11 | yes |
| hypothetical regulatory components of sensory transduction                        | JZ6_10 | JZ6_28 | OK | 523.639 | 197.448 | 0        | 0        | yes |
| Ferritin-like protein                                                             | JZ6_10 | JZ6_28 | OK | 3524.8  | 1325.63 | 0        | 0        | yes |
| putative peptidase T                                                              | JZ6_10 | JZ6_28 | OK | 118.318 | 44.2023 | 4.07E-08 | 1.25E-07 | yes |
| ribosome modulation factor                                                        | JZ6_10 | JZ6_28 | OK | 6266.19 | 2339    | 1.10E-07 | 3.26E-07 | yes |
| Conserved hypothetical protein                                                    | JZ6_10 | JZ6_28 | OK | 425.256 | 157.979 | 4.73E-11 | 1.81E-10 | yes |
| hypothetical protein                                                              | JZ6_10 | JZ6_28 | OK | 214.169 | 79.0949 | 1.33E-15 | 6.64E-15 | yes |

|                                                           |        |        |    |         |         |          |          |     |
|-----------------------------------------------------------|--------|--------|----|---------|---------|----------|----------|-----|
| FxsA protein                                              | JZ6_10 | JZ6_28 | OK | 1567.06 | 578.61  | 0        | 0        | yes |
| Molybdenum cofactor biosynthesis protein A                | JZ6_10 | JZ6_28 | OK | 747.635 | 274.613 | 0        | 0        | yes |
| Amino-acid ABC transporter permease protein               | JZ6_10 | JZ6_28 | OK | 124.547 | 45.6778 | 1.28E-08 | 4.12E-08 | yes |
| thymidine phosphorylase                                   | JZ6_10 | JZ6_28 | OK | 716.323 | 262.695 | 0        | 0        | yes |
| Probable ubiquinone biosynthesis protein ubiB             | JZ6_10 | JZ6_28 | OK | 214.7   | 78.5638 | 0        | 0        | yes |
| Chaperone protein torD                                    | JZ6_10 | JZ6_28 | OK | 1094.38 | 400.163 | 0        | 0        | yes |
| Conserved hypothetical protein                            | JZ6_10 | JZ6_28 | OK | 1383.08 | 504.35  | 4.55E-13 | 1.97E-12 | yes |
| hypothetical protein                                      | JZ6_10 | JZ6_28 | OK | 815.769 | 296.855 | 2.69E-14 | 1.25E-13 | yes |
| Conserved hypothetical protein                            | JZ6_10 | JZ6_28 | OK | 394.007 | 142.745 | 0        | 0        | yes |
| ABC transporter: Transmembrane protein                    | JZ6_10 | JZ6_28 | OK | 131.833 | 47.6521 | 1.15E-07 | 3.40E-07 | yes |
| Outer membrane protein                                    | JZ6_10 | JZ6_28 | OK | 254.592 | 92.0196 | 4.47E-11 | 1.71E-10 | yes |
| D-erythrose-4-phosphate dehydrogenase                     | JZ6_10 | JZ6_28 | OK | 1072    | 387.11  | 0        | 0        | yes |
| Conserved hypothetical protein                            | JZ6_10 | JZ6_28 | OK | 152.752 | 54.7604 | 0        | 0        | yes |
| ABC transporter: substrate-binding protein precursor (BP) | JZ6_10 | JZ6_28 | OK | 224.307 | 80.1043 | 3.89E-12 | 1.59E-11 | yes |
| Adenosine deaminase                                       | JZ6_10 | JZ6_28 | OK | 285.002 | 101.763 | 2.46E-14 | 1.15E-13 | yes |
| Hypothetical protein                                      | JZ6_10 | JZ6_28 | OK | 2877.6  | 1025.5  | 0        | 0        | yes |
| Malonyl CoA-acyl carrier protein transacylase             | JZ6_10 | JZ6_28 | OK | 524.887 | 186.913 | 0        | 0        | yes |
| Formate dehydrogenase alpha chain                         | JZ6_10 | JZ6_28 | OK | 71.8488 | 25.3511 | 9.74E-13 | 4.13E-12 | yes |
| Deoxyribodipyrimidine photolyase                          | JZ6_10 | JZ6_28 | OK | 159.149 | 56.1242 | 1.23E-13 | 5.47E-13 | yes |
| GMP reductase                                             | JZ6_10 | JZ6_28 | OK | 370.694 | 130.337 | 0        | 0        | yes |
| ATP-dependent protease LA-related                         | JZ6_10 | JZ6_28 | OK | 94.6934 | 33.1161 | 2.32E-13 | 1.02E-12 | yes |
| NapD protein                                              | JZ6_10 | JZ6_28 | OK | 1286.68 | 449.911 | 1.05E-09 | 3.64E-09 | yes |
| Hypothetical protein                                      | JZ6_10 | JZ6_28 | OK | 125.84  | 43.9515 | 5.00E-08 | 1.53E-07 | yes |
| PrkA serine protein kinase                                | JZ6_10 | JZ6_28 | OK | 1061.98 | 368.887 | 0        | 0        | yes |
| hypothetical protein                                      | JZ6_10 | JZ6_28 | OK | 10175.5 | 3527.18 | 0        | 0        | yes |
| UDP-N-acetylmuramoylalanine--D-glutamate ligase           | JZ6_10 | JZ6_28 | OK | 174.616 | 60.4884 | 7.34E-13 | 3.14E-12 | yes |
| Hypoxanthine phosphoribosyltransferase                    | JZ6_10 | JZ6_28 | OK | 923.938 | 319.646 | 0        | 0        | yes |
| ABC transporter: substrate binding protein precursor      | JZ6_10 | JZ6_28 | OK | 120.826 | 41.7848 | 2.95E-14 | 1.37E-13 | yes |
| long-chain acyl-CoA synthetase                            | JZ6_10 | JZ6_28 | OK | 150.581 | 51.7878 | 2.00E-15 | 9.88E-15 | yes |
| Cytochrome c-type protein TorC                            | JZ6_10 | JZ6_28 | OK | 664.605 | 228.382 | 0        | 0        | yes |
| putative protease                                         | JZ6_10 | JZ6_28 | OK | 59.2982 | 20.251  | 5.55E-11 | 2.11E-10 | yes |
| DNA recombination protein rmuC homolog                    | JZ6_10 | JZ6_28 | OK | 93.3021 | 31.8546 | 1.51E-09 | 5.19E-09 | yes |

|                                                                             |        |        |    |         |         |          |          |     |
|-----------------------------------------------------------------------------|--------|--------|----|---------|---------|----------|----------|-----|
| Long-chain-fatty-acid--CoA ligase                                           | JZ6_10 | JZ6_28 | OK | 329.022 | 112.329 | 0        | 0        | yes |
| Glucose-6-phosphate isomerase                                               | JZ6_10 | JZ6_28 | OK | 739.604 | 252.373 | 0        | 0        | yes |
| hypothetical protein                                                        | JZ6_10 | JZ6_28 | OK | 293.33  | 99.9228 | 6.40E-07 | 1.77E-06 | yes |
| PfaA, omega-3 polyunsaturated fatty acid synthase                           | JZ6_10 | JZ6_28 | OK | 13.4226 | 4.54648 | 3.62E-08 | 1.12E-07 | yes |
| Sigma-E factor regulatory protein rseB homolog precursor                    | JZ6_10 | JZ6_28 | OK | 342.916 | 115.871 | 0        | 0        | yes |
| methyltransferase-related protein                                           | JZ6_10 | JZ6_28 | OK | 2034.5  | 684.827 | 0        | 0        | yes |
| anaerobic ribonucleoside-triphosphate reductase                             | JZ6_10 | JZ6_28 | OK | 1177.24 | 394.473 | 0        | 0        | yes |
| Hypothetical UPF0325 protein                                                | JZ6_10 | JZ6_28 | OK | 5915.81 | 1957.22 | 0        | 0        | yes |
| putative amino acid ABC transporter, periplasmic amino acid-binding portion | JZ6_10 | JZ6_28 | OK | 871.099 | 287.11  | 0        | 0        | yes |
| 2-amino-3-ketobutyrate coenzyme A ligase                                    | JZ6_10 | JZ6_28 | OK | 98.6127 | 32.4893 | 9.02E-08 | 2.70E-07 | yes |
| ABC transporter: transmembrane protein                                      | JZ6_10 | JZ6_28 | OK | 99.4673 | 32.5936 | 1.15E-06 | 3.10E-06 | yes |
| transcriptional regulator                                                   | JZ6_10 | JZ6_28 | OK | 1066.35 | 348.643 | 0        | 0        | yes |
| hypothetical protein                                                        | JZ6_10 | JZ6_28 | OK | 3807.44 | 1243.8  | 0        | 0        | yes |
| Oxygen-independent coproporphyrinogen III oxidase                           | JZ6_10 | JZ6_28 | OK | 253.681 | 82.7788 | 0        | 0        | yes |
| Glyceraldehyde-3-phosphate dehydrogenase A                                  | JZ6_10 | JZ6_28 | OK | 7799.03 | 2542.84 | 0        | 0        | yes |
| Similar to putative lipid carrier protein                                   | JZ6_10 | JZ6_28 | OK | 588.439 | 191.67  | 2.44E-15 | 1.20E-14 | yes |
| TRAP-type uncharacterized transport system,fused permease component         | JZ6_10 | JZ6_28 | OK | 381.841 | 124.315 | 0        | 0        | yes |
| hypothetical protein                                                        | JZ6_10 | JZ6_28 | OK | 416.057 | 133.444 | 8.75E-07 | 2.38E-06 | yes |
| Hypothetical protein                                                        | JZ6_10 | JZ6_28 | OK | 110.949 | 35.5463 | 0        | 0        | yes |
| Conserved hypothetical protein                                              | JZ6_10 | JZ6_28 | OK | 6079.47 | 1940.93 | 1.80E-14 | 8.44E-14 | yes |
| Conserved hypothetical protein                                              | JZ6_10 | JZ6_28 | OK | 590.721 | 188.568 | 0        | 0        | yes |
| Uridine kinase                                                              | JZ6_10 | JZ6_28 | OK | 1164.02 | 371.012 | 0        | 0        | yes |
| hypothetical protein                                                        | JZ6_10 | JZ6_28 | OK | 227.027 | 72.2825 | 2.53E-11 | 9.86E-11 | yes |
| ATP-dependent Clp protease ATP-binding subunit clpX                         | JZ6_10 | JZ6_28 | OK | 3494.64 | 1106.99 | 0        | 0        | yes |
| hypothetical protein                                                        | JZ6_10 | JZ6_28 | OK | 1725.52 | 546.546 | 1.55E-15 | 7.72E-15 | yes |
| hypothetical protein                                                        | JZ6_10 | JZ6_28 | OK | 2052.68 | 647.986 | 0        | 0        | yes |
| hypothetical protein                                                        | JZ6_10 | JZ6_28 | OK | 472.846 | 149.205 | 1.08E-08 | 3.47E-08 | yes |
| putative sodium/substrate symport                                           | JZ6_10 | JZ6_28 | OK | 294.888 | 92.9762 | 0        | 0        | yes |
| Ribosomal RNA large subunit methyltransferase                               | JZ6_10 | JZ6_28 | OK | 357.713 | 111.5   | 2.22E-16 | 1.15E-15 | yes |
| hypothetical protein                                                        | JZ6_10 | JZ6_28 | OK | 47093.7 | 14601   | 0        | 0        | yes |
| Hypothetical protein                                                        | JZ6_10 | JZ6_28 | OK | 51.3773 | 15.8918 | 4.51E-09 | 1.49E-08 | yes |
| Hypothetical protein                                                        | JZ6_10 | JZ6_28 | OK | 30203.1 | 9322.67 | 0        | 0        | yes |

|                                                                               |        |        |    |         |         |          |          |     |
|-------------------------------------------------------------------------------|--------|--------|----|---------|---------|----------|----------|-----|
| putative tyrosine-phosphatase                                                 | JZ6_10 | JZ6_28 | OK | 293.597 | 90.2255 | 1.97E-06 | 5.19E-06 | yes |
| Conserved hypothetical protein                                                | JZ6_10 | JZ6_28 | OK | 118.087 | 36.2687 | 1.09E-08 | 3.51E-08 | yes |
| deoxyribose-phosphate aldolase                                                | JZ6_10 | JZ6_28 | OK | 1634.09 | 499.907 | 0        | 0        | yes |
| hypothetical protein                                                          | JZ6_10 | JZ6_28 | OK | 989.936 | 302.052 | 3.79E-12 | 1.56E-11 | yes |
| TorCAD operon transcriptional regulatory protein torR                         | JZ6_10 | JZ6_28 | OK | 1278.88 | 389.225 | 0        | 0        | yes |
| ATP-dependent Clp protease, ATP-binding subunit ClpA                          | JZ6_10 | JZ6_28 | OK | 1428.58 | 434.399 | 0        | 0        | yes |
| Thiamine biosynthesis protein thiI                                            | JZ6_10 | JZ6_28 | OK | 644.15  | 192.637 | 0        | 0        | yes |
| ABC transporter, permease protein                                             | JZ6_10 | JZ6_28 | OK | 188.82  | 56.4247 | 1.07E-07 | 3.18E-07 | yes |
| Membrane-fusion protein AcrA                                                  | JZ6_10 | JZ6_28 | OK | 78.5131 | 23.3501 | 2.78E-06 | 7.18E-06 | yes |
| immunogenic protein precursor                                                 | JZ6_10 | JZ6_28 | OK | 3216.61 | 953.171 | 0        | 0        | yes |
| ABC transporter: Transmembrane protein                                        | JZ6_10 | JZ6_28 | OK | 199.363 | 58.8266 | 0        | 0        | yes |
| Cyclopropane-fatty-acyl-phospholipid synthase                                 | JZ6_10 | JZ6_28 | OK | 69.139  | 20.2602 | 6.82E-07 | 1.88E-06 | yes |
| hypothetical protein                                                          | JZ6_10 | JZ6_28 | OK | 1952.82 | 571.607 | 0        | 0        | yes |
| Transmembrane regulatory protein toxS                                         | JZ6_10 | JZ6_28 | OK | 358.616 | 104.648 | 7.19E-10 | 2.52E-09 | yes |
| putative Cys/Met metabolism pyridoxal-phosphate-dependent enzyme              | JZ6_10 | JZ6_28 | OK | 671.967 | 196.065 | 0        | 0        | yes |
| putative transporter fused subunits of ABC superfamily: ATP-binding component | JZ6_10 | JZ6_28 | OK | 524.138 | 152.716 | 0        | 0        | yes |
| ABC transporter: Transmembrane protein                                        | JZ6_10 | JZ6_28 | OK | 139.94  | 40.7586 | 1.65E-09 | 5.65E-09 | yes |
| hypothetical protein                                                          | JZ6_10 | JZ6_28 | OK | 1268.12 | 368.806 | 1.87E-09 | 6.36E-09 | yes |
| hypothetical protein                                                          | JZ6_10 | JZ6_28 | OK | 3471.12 | 1007.98 | 0        | 0        | yes |
| Conserved hypothetical protein                                                | JZ6_10 | JZ6_28 | OK | 116.864 | 33.923  | 1.66E-06 | 4.40E-06 | yes |
| Cell division protein ftsY                                                    | JZ6_10 | JZ6_28 | OK | 817.819 | 232.308 | 0        | 0        | yes |
| hypothetical protein                                                          | JZ6_10 | JZ6_28 | OK | 459.454 | 130.048 | 0        | 0        | yes |
| 3-oxoacyl-                                                                    | JZ6_10 | JZ6_28 | OK | 351.339 | 98.6439 | 0        | 0        | yes |
| 3-oxoacyl-                                                                    | JZ6_10 | JZ6_28 | OK | 3144.62 | 876.643 | 0        | 0        | yes |
| hypothetical protein                                                          | JZ6_10 | JZ6_28 | OK | 324.728 | 90.4436 | 0        | 0        | yes |
| hypothetical protein                                                          | JZ6_10 | JZ6_28 | OK | 308.13  | 85.4748 | 1.91E-13 | 8.40E-13 | yes |
| Biotin synthesis protein bioC                                                 | JZ6_10 | JZ6_28 | OK | 107.612 | 29.7354 | 2.12E-06 | 5.57E-06 | yes |
| D-methionine-binding lipoprotein metQ precursor                               | JZ6_10 | JZ6_28 | OK | 720.52  | 197.331 | 0        | 0        | yes |
| RNA polymerase associated protein rapA                                        | JZ6_10 | JZ6_28 | OK | 197.983 | 53.9347 | 0        | 0        | yes |
| hypothetical protein                                                          | JZ6_10 | JZ6_28 | OK | 98733.5 | 26446.7 | 0        | 0        | yes |
| hypothetical protein                                                          | JZ6_10 | JZ6_28 | OK | 390.21  | 104.402 | 0        | 0        | yes |
| Conserved hypothetical protein                                                | JZ6_10 | JZ6_28 | OK | 330.262 | 88.0712 | 0        | 0        | yes |

|                                                                        |        |        |    |         |         |          |          |     |
|------------------------------------------------------------------------|--------|--------|----|---------|---------|----------|----------|-----|
| universal stress protein A                                             | JZ6_10 | JZ6_28 | OK | 413.508 | 109.687 | 1.53E-08 | 4.87E-08 | yes |
| Membrane protein                                                       | JZ6_10 | JZ6_28 | OK | 138.973 | 36.8167 | 2.04E-10 | 7.50E-10 | yes |
| hypothetical protein                                                   | JZ6_10 | JZ6_28 | OK | 33172.8 | 8750.45 | 0        | 0        | yes |
| Hypothetical protein                                                   | JZ6_10 | JZ6_28 | OK | 64.9941 | 17.1348 | 4.83E-08 | 1.47E-07 | yes |
| putative muconate cycloisomerase                                       | JZ6_10 | JZ6_28 | OK | 141.453 | 37.1    | 5.27E-10 | 1.87E-09 | yes |
| Hypothetical protein                                                   | JZ6_10 | JZ6_28 | OK | 51.0579 | 13.3704 | 7.13E-07 | 1.97E-06 | yes |
| RNA-binding protein                                                    | JZ6_10 | JZ6_28 | OK | 995.052 | 260.245 | 0        | 0        | yes |
| Conserved hypothetical protein                                         | JZ6_10 | JZ6_28 | OK | 171.101 | 44.2315 | 5.20E-12 | 2.12E-11 | yes |
| ABC transporter: ATP-binding protein                                   | JZ6_10 | JZ6_28 | OK | 385.945 | 99.2986 | 0        | 0        | yes |
| Lipid A biosynthesis lauroyl acyltransferase                           | JZ6_10 | JZ6_28 | OK | 180.719 | 46.129  | 2.23E-12 | 9.28E-12 | yes |
| putative response regulator receiver: Metal-dependent phosphohydrolase | JZ6_10 | JZ6_28 | OK | 111.6   | 28.4473 | 5.00E-09 | 1.65E-08 | yes |
| Hypothetical protein                                                   | JZ6_10 | JZ6_28 | OK | 15401.1 | 3920.08 | 0        | 0        | yes |
| putative dimethylmenaquinone methyltransferase                         | JZ6_10 | JZ6_28 | OK | 435.083 | 110.74  | 2.00E-15 | 9.88E-15 | yes |
| Hypothetical protein                                                   | JZ6_10 | JZ6_28 | OK | 95.0602 | 24.1904 | 6.07E-11 | 2.30E-10 | yes |
| putative ATPase involved in DNA repair                                 | JZ6_10 | JZ6_28 | OK | 1362.3  | 346.236 | 0        | 0        | yes |
| ABC transporter: Substrate-binding protein precursor                   | JZ6_10 | JZ6_28 | OK | 107.275 | 27.0638 | 1.71E-10 | 6.29E-10 | yes |
| hypothetical protein                                                   | JZ6_10 | JZ6_28 | OK | 1611.33 | 405.005 | 0        | 0        | yes |
| 4-hydroxyphenylpyruvate dioxygenase (4HPPD) (hemolysin)                | JZ6_10 | JZ6_28 | OK | 127.179 | 31.6067 | 3.65E-10 | 1.31E-09 | yes |
| hypothetical protein                                                   | JZ6_10 | JZ6_28 | OK | 2809.8  | 685.9   | 0        | 0        | yes |
| Long-chain fatty acid transport protein precursor                      | JZ6_10 | JZ6_28 | OK | 371.154 | 90.5681 | 0        | 0        | yes |
| Phosphoserine aminotransferase                                         | JZ6_10 | JZ6_28 | OK | 244.863 | 59.5574 | 0        | 0        | yes |
| putative deoxycytidylate deaminase                                     | JZ6_10 | JZ6_28 | OK | 5561.38 | 1348.4  | 0        | 0        | yes |
| Universal stress protein B homolog                                     | JZ6_10 | JZ6_28 | OK | 4982.59 | 1206.42 | 0        | 0        | yes |
| transporter, BCCT family                                               | JZ6_10 | JZ6_28 | OK | 396.012 | 95.4314 | 0        | 0        | yes |
| putative KHG/KDPG aldolase                                             | JZ6_10 | JZ6_28 | OK | 229.611 | 55.0885 | 9.59E-10 | 3.33E-09 | yes |
| Phosphoserine phosphatase                                              | JZ6_10 | JZ6_28 | OK | 422.333 | 101.144 | 0        | 0        | yes |
| Hypothetical protein                                                   | JZ6_10 | JZ6_28 | OK | 466.119 | 111.233 | 0        | 0        | yes |
| 3-oxoacyl-                                                             | JZ6_10 | JZ6_28 | OK | 1738.42 | 405.203 | 0        | 0        | yes |
| putative hemolysin                                                     | JZ6_10 | JZ6_28 | OK | 148.632 | 34.5432 | 0        | 0        | yes |
| hypothetical protein                                                   | JZ6_10 | JZ6_28 | OK | 784.322 | 182.192 | 8.05E-09 | 2.62E-08 | yes |
| 5'-nucleotidase/2',3'-cyclic phosphodiesterase                         | JZ6_10 | JZ6_28 | OK | 181.213 | 41.9977 | 0        | 0        | yes |
| Hypothetical protein                                                   | JZ6_10 | JZ6_28 | OK | 722.393 | 167.387 | 2.55E-07 | 7.28E-07 | yes |



|                                                                                |        |        |    |         |         |          |          |     |
|--------------------------------------------------------------------------------|--------|--------|----|---------|---------|----------|----------|-----|
| Conserved hypothetical protein                                                 | JZ6_10 | JZ6_28 | OK | 2193.12 | 504.744 | 0        | 0        | yes |
| Predicted periplasmic protein                                                  | JZ6_10 | JZ6_28 | OK | 175.599 | 40.1859 | 4.01E-08 | 1.23E-07 | yes |
| glycine cleavage system H protein                                              | JZ6_10 | JZ6_28 | OK | 15896.9 | 3634.12 | 0        | 0        | yes |
| hypothetical protein                                                           | JZ6_10 | JZ6_28 | OK | 1301.17 | 295.094 | 3.38E-08 | 1.05E-07 | yes |
| PTS family enzyme IIA                                                          | JZ6_10 | JZ6_28 | OK | 142.352 | 32.1112 | 0        | 0        | yes |
| S-adenosylmethionine:2-demethylmenaquinone methyltransferase                   | JZ6_10 | JZ6_28 | OK | 3328.63 | 741.023 | 0        | 0        | yes |
| ABC transporter: two domain ATP-binding protein                                | JZ6_10 | JZ6_28 | OK | 55.0251 | 12.2207 | 8.63E-08 | 2.58E-07 | yes |
| putative glycine betaine transporter                                           | JZ6_10 | JZ6_28 | OK | 40.2209 | 8.90533 | 3.28E-06 | 8.42E-06 | yes |
| GTP-binding protein era homolog                                                | JZ6_10 | JZ6_28 | OK | 2160.47 | 473.301 | 0        | 0        | yes |
| S-adenosylmethionine synthetase                                                | JZ6_10 | JZ6_28 | OK | 456.887 | 100.082 | 0        | 0        | yes |
| hypothetical protein                                                           | JZ6_10 | JZ6_28 | OK | 6967.27 | 1523.63 | 0        | 0        | yes |
| putative phosphate permease                                                    | JZ6_10 | JZ6_28 | OK | 249.471 | 53.7666 | 0        | 0        | yes |
| Pyruvate kinase I                                                              | JZ6_10 | JZ6_28 | OK | 4800.74 | 1027.19 | 0        | 0        | yes |
| putative sensor protein                                                        | JZ6_10 | JZ6_28 | OK | 103.528 | 22.0067 | 3.82E-14 | 1.76E-13 | yes |
| Sensor histidine kinase, CqsS                                                  | JZ6_10 | JZ6_28 | OK | 67.1794 | 14.0415 | 5.32E-10 | 1.89E-09 | yes |
| Conserved hypothetical protein                                                 | JZ6_10 | JZ6_28 | OK | 341648  | 71207.1 | 0        | 0        | yes |
| hypothetical lipoprotein-related protein                                       | JZ6_10 | JZ6_28 | OK | 1166.05 | 241.217 | 0        | 0        | yes |
| Hypothetical protein                                                           | JZ6_10 | JZ6_28 | OK | 514.808 | 106.391 | 0        | 0        | yes |
| Acyl carrier protein                                                           | JZ6_10 | JZ6_28 | OK | 48634.1 | 10022.4 | 0        | 0        | yes |
| Na <sup>+</sup> /H <sup>+</sup> antiporter NhaD and related arsenite permeases | JZ6_10 | JZ6_28 | OK | 114.069 | 23.2905 | 5.44E-14 | 2.48E-13 | yes |
| Alkaline phosphatase III precursor                                             | JZ6_10 | JZ6_28 | OK | 259.999 | 52.2893 | 0        | 0        | yes |
| putative capsular polysaccharide biosynthesis protein                          | JZ6_10 | JZ6_28 | OK | 120.284 | 24.1452 | 7.23E-07 | 1.99E-06 | yes |
| Sulfite reductase                                                              | JZ6_10 | JZ6_28 | OK | 81.0717 | 16.0728 | 1.46E-13 | 6.49E-13 | yes |
| chemotactic transducer-related protein                                         | JZ6_10 | JZ6_28 | OK | 30.9865 | 6.07763 | 6.49E-10 | 2.29E-09 | yes |
| ABC transporter: ATP-binding protein                                           | JZ6_10 | JZ6_28 | OK | 142.216 | 27.7888 | 9.19E-14 | 4.12E-13 | yes |
| Soluble lytic murein transglycosylase                                          | JZ6_10 | JZ6_28 | OK | 42.2215 | 8.24326 | 4.01E-07 | 1.12E-06 | yes |
| Glyceraldehyde-3-phosphate dehydrogenase 3                                     | JZ6_10 | JZ6_28 | OK | 68.2867 | 13.303  | 3.20E-06 | 8.22E-06 | yes |
| hypothetical protein                                                           | JZ6_10 | JZ6_28 | OK | 727.274 | 141.181 | 0        | 0        | yes |
| Probable sigma(54) modulation protein                                          | JZ6_10 | JZ6_28 | OK | 2787.92 | 540.309 | 0        | 0        | yes |
| ABC transporter: Transmembrane protein                                         | JZ6_10 | JZ6_28 | OK | 52.2864 | 10.0918 | 4.45E-13 | 1.93E-12 | yes |
| Conserved hypothetical protein                                                 | JZ6_10 | JZ6_28 | OK | 1143.66 | 220.6   | 0        | 0        | yes |
| Hypothetical protein                                                           | JZ6_10 | JZ6_28 | OK | 27120.8 | 5208.81 | 0        | 0        | yes |

|                                                            |        |        |    |         |         |          |          |     |
|------------------------------------------------------------|--------|--------|----|---------|---------|----------|----------|-----|
| putative cytochrome c, class I                             | JZ6_10 | JZ6_28 | OK | 54.6764 | 10.4887 | 2.55E-07 | 7.28E-07 | yes |
| Conserved hypothetical protein                             | JZ6_10 | JZ6_28 | OK | 867.567 | 164.362 | 2.32E-07 | 6.66E-07 | yes |
| Methionine sulfoxide reductase                             | JZ6_10 | JZ6_28 | OK | 182.837 | 34.5041 | 0        | 0        | yes |
| putative alcohol dehydrogenase                             | JZ6_10 | JZ6_28 | OK | 693.791 | 130.629 | 0        | 0        | yes |
| Multi antimicrobial extrusion protein MatE                 | JZ6_10 | JZ6_28 | OK | 65.321  | 12.2694 | 1.45E-08 | 4.64E-08 | yes |
| Protoheme IX farnesyltransferase                           | JZ6_10 | JZ6_28 | OK | 88.6007 | 16.6323 | 1.72E-07 | 4.98E-07 | yes |
| ABC transporter: Transmembrane and ATP-binding protein     | JZ6_10 | JZ6_28 | OK | 316.893 | 59.2151 | 0        | 0        | yes |
| ABC transporter: Substrate binding protein precursor       | JZ6_10 | JZ6_28 | OK | 91.3874 | 16.7836 | 8.28E-12 | 3.33E-11 | yes |
| putative esterase                                          | JZ6_10 | JZ6_28 | OK | 348.017 | 63.5831 | 0        | 0        | yes |
| putative Holliday junction resolvase                       | JZ6_10 | JZ6_28 | OK | 648.155 | 116.728 | 2.22E-16 | 1.15E-15 | yes |
| AcrB/AcrD/AcrF family                                      | JZ6_10 | JZ6_28 | OK | 35.8746 | 6.4545  | 4.42E-11 | 1.69E-10 | yes |
| putative two-component sensor                              | JZ6_10 | JZ6_28 | OK | 226.494 | 40.7308 | 0        | 0        | yes |
| hypothetical protein                                       | JZ6_10 | JZ6_28 | OK | 157.261 | 28.2662 | 8.61E-07 | 2.35E-06 | yes |
| hypothetical protein                                       | JZ6_10 | JZ6_28 | OK | 4456.43 | 799.709 | 0        | 0        | yes |
| transcriptional regulator, LuxR family                     | JZ6_10 | JZ6_28 | OK | 248.882 | 43.9328 | 2.82E-11 | 1.09E-10 | yes |
| hypothetical protein                                       | JZ6_10 | JZ6_28 | OK | 7618.37 | 1336.13 | 0        | 0        | yes |
| putative membrane protein                                  | JZ6_10 | JZ6_28 | OK | 62.4287 | 10.9441 | 6.23E-07 | 1.73E-06 | yes |
| Hypothetical protein                                       | JZ6_10 | JZ6_28 | OK | 370.042 | 64.6109 | 0        | 0        | yes |
| putative glutamate synthetase                              | JZ6_10 | JZ6_28 | OK | 68.0379 | 11.6983 | 1.64E-10 | 6.05E-10 | yes |
| Conserved hypothetical protein                             | JZ6_10 | JZ6_28 | OK | 552.749 | 94.0914 | 0        | 0        | yes |
| Heat shock protein                                         | JZ6_10 | JZ6_28 | OK | 1946.43 | 329.249 | 0        | 0        | yes |
| Sigma-54 dependent transcriptional regulator               | JZ6_10 | JZ6_28 | OK | 53.2288 | 8.95144 | 3.19E-07 | 9.02E-07 | yes |
| Oxidoreductase, short-chain dehydrogenase/reductase family | JZ6_10 | JZ6_28 | OK | 229.546 | 38.2687 | 3.63E-13 | 1.58E-12 | yes |
| hypothetical protein                                       | JZ6_10 | JZ6_28 | OK | 3623.34 | 602.246 | 2.22E-16 | 1.15E-15 | yes |
| ABC transporter: Transmembrane protein                     | JZ6_10 | JZ6_28 | OK | 79.2216 | 12.8987 | 2.21E-12 | 9.23E-12 | yes |
| Conserved hypothetical receptor                            | JZ6_10 | JZ6_28 | OK | 206.546 | 33.1432 | 0        | 0        | yes |
| putative transduction protein                              | JZ6_10 | JZ6_28 | OK | 28.9903 | 4.62264 | 1.45E-07 | 4.25E-07 | yes |
| Predicted phosphatase/phosphohexomutase                    | JZ6_10 | JZ6_28 | OK | 418.384 | 66.7    | 0        | 0        | yes |
| 5'-nucleotidase/2',3'-cyclic phosphodiesterase             | JZ6_10 | JZ6_28 | OK | 500.154 | 79.5041 | 0        | 0        | yes |
| hypothetical protein                                       | JZ6_10 | JZ6_28 | OK | 380.532 | 60.4047 | 0        | 0        | yes |
| Diaminobutyrate--2-oxoglutarate aminotransferase           | JZ6_10 | JZ6_28 | OK | 49.5599 | 7.81403 | 2.89E-15 | 1.41E-14 | yes |
| putative alkaline phosphatase                              | JZ6_10 | JZ6_28 | OK | 736.695 | 114.418 | 0        | 0        | yes |

|                                                            |        |        |    |         |         |          |          |     |
|------------------------------------------------------------|--------|--------|----|---------|---------|----------|----------|-----|
| hypothetical protein                                       | JZ6_10 | JZ6_28 | OK | 1431.68 | 219.852 | 8.27E-12 | 3.33E-11 | yes |
| Hypothetical protein                                       | JZ6_10 | JZ6_28 | OK | 101.296 | 15.4267 | 1.12E-06 | 3.02E-06 | yes |
| Cell division protein ftsX                                 | JZ6_10 | JZ6_28 | OK | 181.613 | 27.4652 | 8.66E-15 | 4.13E-14 | yes |
| Integration host factor beta-subunit (IHF-beta)            | JZ6_10 | JZ6_28 | OK | 46177.6 | 6971.21 | 0        | 0        | yes |
| Molybdenum cofactor biosynthesis protein E                 | JZ6_10 | JZ6_28 | OK | 394.252 | 59.1935 | 3.69E-12 | 1.52E-11 | yes |
| hypothetical protein                                       | JZ6_10 | JZ6_28 | OK | 301.489 | 44.5403 | 0        | 0        | yes |
| hypothetical protein                                       | JZ6_10 | JZ6_28 | OK | 14713.1 | 2158.34 | 0        | 0        | yes |
| hypothetical protein                                       | JZ6_10 | JZ6_28 | OK | 318.758 | 46.3875 | 0        | 0        | yes |
| Conserved hypothetical protein                             | JZ6_10 | JZ6_28 | OK | 62632.7 | 8985.06 | 0        | 0        | yes |
| putative threonine efflux protein                          | JZ6_10 | JZ6_28 | OK | 148.571 | 21.2466 | 4.38E-07 | 1.23E-06 | yes |
| Phenylalanine-4-hydroxylase                                | JZ6_10 | JZ6_28 | OK | 190.852 | 27.1723 | 8.16E-13 | 3.48E-12 | yes |
| hypothetical protein                                       | JZ6_10 | JZ6_28 | OK | 1174.01 | 165.961 | 0        | 0        | yes |
| Universal stress protein E                                 | JZ6_10 | JZ6_28 | OK | 1712.46 | 241.176 | 0        | 0        | yes |
| Amino acid ABC transporter                                 | JZ6_10 | JZ6_28 | OK | 5584.43 | 785.752 | 0        | 0        | yes |
| Purine nucleoside phosphorylase                            | JZ6_10 | JZ6_28 | OK | 1943.41 | 271.117 | 0        | 0        | yes |
| Conserved hypothetical protein                             | JZ6_10 | JZ6_28 | OK | 180.372 | 24.8241 | 2.66E-10 | 9.69E-10 | yes |
| Outer membrane protein                                     | JZ6_10 | JZ6_28 | OK | 211.413 | 29.079  | 0        | 0        | yes |
| Phosphotransferase system, fructose-specific IIC component | JZ6_10 | JZ6_28 | OK | 54.3763 | 7.43673 | 2.25E-10 | 8.22E-10 | yes |
| hypothetical protein                                       | JZ6_10 | JZ6_28 | OK | 363.175 | 49.089  | 4.70E-09 | 1.55E-08 | yes |
| Transmembrane water channel Aquaporin Z                    | JZ6_10 | JZ6_28 | OK | 106.649 | 14.0227 | 3.89E-06 | 9.89E-06 | yes |
| Protein mazG homolog                                       | JZ6_10 | JZ6_28 | OK | 921.818 | 121.032 | 0        | 0        | yes |
| putative membrane protein                                  | JZ6_10 | JZ6_28 | OK | 58.896  | 7.6071  | 9.36E-08 | 2.79E-07 | yes |
| Cell division protein BolA                                 | JZ6_10 | JZ6_28 | OK | 2343.39 | 299.445 | 0        | 0        | yes |
| Acyl-coenzyme A synthetases                                | JZ6_10 | JZ6_28 | OK | 274.148 | 35.026  | 0        | 0        | yes |
| putative metal-dependent hydrolase                         | JZ6_10 | JZ6_28 | OK | 90.9285 | 11.6071 | 7.90E-08 | 2.37E-07 | yes |
| hypothetical protein                                       | JZ6_10 | JZ6_28 | OK | 170.654 | 21.7126 | 6.66E-16 | 3.37E-15 | yes |
| hypothetical protein                                       | JZ6_10 | JZ6_28 | OK | 109.99  | 13.9868 | 2.91E-14 | 1.35E-13 | yes |
| Transcriptional regulator                                  | JZ6_10 | JZ6_28 | OK | 313.956 | 39.421  | 4.44E-16 | 2.26E-15 | yes |
| Hypothetical protein                                       | JZ6_10 | JZ6_28 | OK | 3772.68 | 473.192 | 0        | 0        | yes |
| ABC transporter: transmembrane protein                     | JZ6_10 | JZ6_28 | OK | 75.3259 | 9.42918 | 2.33E-06 | 6.07E-06 | yes |
| Integration host factor, alpha subunit                     | JZ6_10 | JZ6_28 | OK | 15066.2 | 1825.77 | 0        | 0        | yes |
| Flp pilus assembly protein                                 | JZ6_10 | JZ6_28 | OK | 154.652 | 18.4313 | 0        | 0        | yes |

|                                                                   |        |        |    |         |         |          |          |     |
|-------------------------------------------------------------------|--------|--------|----|---------|---------|----------|----------|-----|
| NAD-dependent aldehyde dehydrogenase                              | JZ6_10 | JZ6_28 | OK | 39.4764 | 4.66708 | 1.18E-06 | 3.18E-06 | yes |
| Short-chain dehydrogenase/reductase                               | JZ6_10 | JZ6_28 | OK | 90.5037 | 10.6855 | 1.17E-06 | 3.16E-06 | yes |
| putative ornithine carbamoyltransferase                           | JZ6_10 | JZ6_28 | OK | 1282.16 | 147.425 | 0        | 0        | yes |
| Penicillin-insensitive murein endopeptidase precursor             | JZ6_10 | JZ6_28 | OK | 83.8356 | 9.52576 | 7.61E-07 | 2.09E-06 | yes |
| putative outer membrane protein                                   | JZ6_10 | JZ6_28 | OK | 476.223 | 53.271  | 0        | 0        | yes |
| Probable lactoylglutathione lyase                                 | JZ6_10 | JZ6_28 | OK | 8564.53 | 923.157 | 0        | 0        | yes |
| ABC-type Fe <sup>3+</sup> transport system, periplasmic component | JZ6_10 | JZ6_28 | OK | 814.177 | 86.9659 | 0        | 0        | yes |
| hypothetical protein                                              | JZ6_10 | JZ6_28 | OK | 37.4217 | 3.97827 | 3.33E-07 | 9.42E-07 | yes |
| hypothetical protein                                              | JZ6_10 | JZ6_28 | OK | 118.987 | 12.5049 | 2.66E-15 | 1.31E-14 | yes |
| Hypothetical protein                                              | JZ6_10 | JZ6_28 | OK | 474.278 | 49.1594 | 2.48E-09 | 8.35E-09 | yes |
| Zinc-binding dehydrogenase                                        | JZ6_10 | JZ6_28 | OK | 278.749 | 28.3091 | 0        | 0        | yes |
| Conserved hypothetical protein                                    | JZ6_10 | JZ6_28 | OK | 100.719 | 10.2152 | 1.33E-15 | 6.64E-15 | yes |
| Conserved hypothetical protein                                    | JZ6_10 | JZ6_28 | OK | 207.09  | 20.9982 | 1.33E-15 | 6.64E-15 | yes |
| hypothetical protein                                              | JZ6_10 | JZ6_28 | OK | 1203.46 | 121.911 | 2.04E-07 | 5.89E-07 | yes |
| inosine monophosphate dehydrogenase-related protein               | JZ6_10 | JZ6_28 | OK | 1497.42 | 149.181 | 0        | 0        | yes |
| ABC-type sugar transport system, periplasmic component            | JZ6_10 | JZ6_28 | OK | 557.635 | 54.1971 | 0        | 0        | yes |
| Arylsulfatase                                                     | JZ6_10 | JZ6_28 | OK | 1077    | 102.594 | 0        | 0        | yes |
| Hypothetical protein                                              | JZ6_10 | JZ6_28 | OK | 21431.8 | 2015.62 | 0        | 0        | yes |
| Predicted phosphatase/phosphohexomutase                           | JZ6_10 | JZ6_28 | OK | 378.193 | 35.3445 | 0        | 0        | yes |
| Transcriptional regulator, LysR family                            | JZ6_10 | JZ6_28 | OK | 1922.21 | 179.64  | 0        | 0        | yes |
| hypothetical protein                                              | JZ6_10 | JZ6_28 | OK | 237.029 | 21.9304 | 1.02E-14 | 4.85E-14 | yes |
| Periplasmic protein involved in polysaccharide export             | JZ6_10 | JZ6_28 | OK | 69.5887 | 6.4357  | 1.04E-14 | 4.96E-14 | yes |
| hypothetical protein                                              | JZ6_10 | JZ6_28 | OK | 765.519 | 69.6474 | 0        | 0        | yes |
| Conserved hypothetical protein                                    | JZ6_10 | JZ6_28 | OK | 209.483 | 18.901  | 0        | 0        | yes |
| Protein cyaY                                                      | JZ6_10 | JZ6_28 | OK | 15017.7 | 1346.11 | 0        | 0        | yes |
| Polyphosphate kinase                                              | JZ6_10 | JZ6_28 | OK | 91.9833 | 8.22039 | 0        | 0        | yes |
| TPR-repeat-containing protein                                     | JZ6_10 | JZ6_28 | OK | 116.446 | 10.2597 | 1.14E-10 | 4.26E-10 | yes |
| Hypothetical protein                                              | JZ6_10 | JZ6_28 | OK | 181.639 | 15.9612 | 2.44E-15 | 1.20E-14 | yes |
| putative periplasmic protein                                      | JZ6_10 | JZ6_28 | OK | 1433.04 | 124.647 | 0        | 0        | yes |
| Conserved hypothetical protein                                    | JZ6_10 | JZ6_28 | OK | 79849.2 | 6802.57 | 0        | 0        | yes |
| hypothetical membrane protein                                     | JZ6_10 | JZ6_28 | OK | 45.1535 | 3.54721 | 1.53E-06 | 4.07E-06 | yes |
| Dethiobiotin synthetase                                           | JZ6_10 | JZ6_28 | OK | 331.371 | 25.9491 | 0        | 0        | yes |

|                                                                        |        |        |    |         |         |          |          |     |
|------------------------------------------------------------------------|--------|--------|----|---------|---------|----------|----------|-----|
| Hypothetical protein                                                   | JZ6_10 | JZ6_28 | OK | 66.6789 | 5.19767 | 1.50E-06 | 4.01E-06 | yes |
| NADH oxidase                                                           | JZ6_10 | JZ6_28 | OK | 59.6919 | 4.63607 | 1.34E-06 | 3.59E-06 | yes |
| putative cytochrome c oxidase, subunit I                               | JZ6_10 | JZ6_28 | OK | 408.789 | 31.0357 | 0        | 0        | yes |
| putative outer membrane lipoprotein                                    | JZ6_10 | JZ6_28 | OK | 143874  | 10833.6 | 0        | 0        | yes |
| Predicted membrane-associated, metal-dependent hydrolase               | JZ6_10 | JZ6_28 | OK | 95.9241 | 7.14014 | 8.44E-15 | 4.03E-14 | yes |
| Hypothetical protein                                                   | JZ6_10 | JZ6_28 | OK | 371.66  | 27.0453 | 1.13E-09 | 3.90E-09 | yes |
| DNA-binding response regulator PhoB                                    | JZ6_10 | JZ6_28 | OK | 583.169 | 41.2896 | 0        | 0        | yes |
| NADH dehydrogenase subunit II-related protein                          | JZ6_10 | JZ6_28 | OK | 41246.1 | 2859.84 | 0        | 0        | yes |
| ABC transporter: Substrate-binding protein precursor; phosphate uptake | JZ6_10 | JZ6_28 | OK | 1621.36 | 111.03  | 0        | 0        | yes |
| conserved hypothetical protein                                         | JZ6_10 | JZ6_28 | OK | 653.134 | 44.3665 | 0        | 0        | yes |
| Hypothetical protein containg GGDEF domain                             | JZ6_10 | JZ6_28 | OK | 329.016 | 22.2399 | 0        | 0        | yes |
| putative membrane protein                                              | JZ6_10 | JZ6_28 | OK | 750.814 | 48.6522 | 0        | 0        | yes |
| hypothetical protein                                                   | JZ6_10 | JZ6_28 | OK | 234.757 | 13.7821 | 6.90E-08 | 2.08E-07 | yes |
| ABC transporter: Substrate binding protein precursor                   | JZ6_10 | JZ6_28 | OK | 768.094 | 44.4511 | 0        | 0        | yes |
| putative transcriptional activator                                     | JZ6_10 | JZ6_28 | OK | 148.759 | 8.45522 | 4.42E-08 | 1.36E-07 | yes |
| RpoS-like sigma factor                                                 | JZ6_10 | JZ6_28 | OK | 728.066 | 40.7599 | 0        | 0        | yes |
| hypothetical protein                                                   | JZ6_10 | JZ6_28 | OK | 30579.9 | 1701.48 | 0        | 0        | yes |
| Flp pilus assembly protein                                             | JZ6_10 | JZ6_28 | OK | 189.81  | 10.3781 | 0        | 0        | yes |
| hypothetical protein                                                   | JZ6_10 | JZ6_28 | OK | 413.054 | 21.9095 | 1.96E-08 | 6.18E-08 | yes |
| Molybdenum cofactor biosynthesis protein B                             | JZ6_10 | JZ6_28 | OK | 580.674 | 30.1627 | 0        | 0        | yes |
| Carbamate kinase                                                       | JZ6_10 | JZ6_28 | OK | 404.58  | 20.2517 | 0        | 0        | yes |
| putative stomatin-like protein                                         | JZ6_10 | JZ6_28 | OK | 138.951 | 6.93989 | 9.70E-09 | 3.14E-08 | yes |
| putative carbamate kinase                                              | JZ6_10 | JZ6_28 | OK | 1074.56 | 51.1161 | 0        | 0        | yes |
| Arginine deiminase                                                     | JZ6_10 | JZ6_28 | OK | 2406.34 | 111.768 | 0        | 0        | yes |
| hypothetical protein                                                   | JZ6_10 | JZ6_28 | OK | 175.335 | 7.95422 | 3.15E-09 | 1.05E-08 | yes |
| hypothetical protein                                                   | JZ6_10 | JZ6_28 | OK | 977.069 | 42.6144 | 0        | 0        | yes |
| hypothetical protein                                                   | JZ6_10 | JZ6_28 | OK | 1211.98 | 52.1524 | 1.58E-09 | 5.42E-09 | yes |
| Hypothetical protein                                                   | JZ6_10 | JZ6_28 | OK | 518.241 | 21.0617 | 0        | 0        | yes |
| ABC transporter: substrate binding protein precursor                   | JZ6_10 | JZ6_28 | OK | 151.885 | 5.60258 | 7.33E-15 | 3.51E-14 | yes |
| hypothetical protein                                                   | JZ6_10 | JZ6_28 | OK | 30498   | 1088.7  | 0        | 0        | yes |
| Dihydrolipoyl dehydrogenase                                            | JZ6_10 | JZ6_28 | OK | 292.517 | 9.63112 | 0        | 0        | yes |
| Tryptophanase (L-tryptophan indole-lyase)                              | JZ6_10 | JZ6_28 | OK | 354.204 | 11.1271 | 0        | 0        | yes |

|                                                                    |        |        |    |         |         |          |          |     |
|--------------------------------------------------------------------|--------|--------|----|---------|---------|----------|----------|-----|
| ABC-type multidrug transport system, ATPase and permease component | JZ6_10 | JZ6_28 | OK | 821.774 | 24.1945 | 0        | 0        | yes |
| putative endoribonuclease                                          | JZ6_10 | JZ6_28 | OK | 142.857 | 3.87374 | 2.98E-12 | 1.23E-11 | yes |
| putative Glycosyl transferase                                      | JZ6_10 | JZ6_28 | OK | 355.131 | 9.29366 | 0        | 0        | yes |
| Exopolyphosphatase                                                 | JZ6_10 | JZ6_28 | OK | 64.7712 | 1.49115 | 2.35E-07 | 6.75E-07 | yes |
| Outer membrane protein                                             | JZ6_10 | JZ6_28 | OK | 1596.33 | 36.6176 | 0        | 0        | yes |
| putative Acid phosphatase homologue                                | JZ6_10 | JZ6_28 | OK | 868.126 | 14.3472 | 1.33E-15 | 6.64E-15 | yes |
| Extracellular zinc metalloprotease                                 | JZ6_10 | JZ6_28 | OK | 2521.28 | 37.0821 | 0        | 0        | yes |
| putative orphan protein                                            | JZ6_10 | JZ6_28 | OK | 469.715 | 6.78235 | 5.41E-09 | 1.78E-08 | yes |
| Hypothetical protein                                               | JZ6_10 | JZ6_28 | OK | 706.627 | 8.03175 | 6.80E-10 | 2.39E-09 | yes |
| Predicted integral membrane protein                                | JZ6_10 | JZ6_28 | OK | 4926.04 | 30.7236 | 2.28E-12 | 9.49E-12 | yes |

Table S2 List of differentially expressed genes in strain TZ19 at 10 °C (TZ19\_10) versus at 28 °C (TZ19\_28).

| Gene name                                                          | Group1  | Group2  | States | FPKM1   | FPKM2   | E-value1 | E-value2 | Significant |
|--------------------------------------------------------------------|---------|---------|--------|---------|---------|----------|----------|-------------|
| hypothetical protein                                               | TZ19_10 | TZ19_28 | OK     | 49.4012 | 1475.96 | 0        | 0        | yes         |
| Sulfate adenylate transferase subunit 1                            | TZ19_10 | TZ19_28 | OK     | 8.79409 | 233.466 | 0        | 0        | yes         |
| long-chain fatty acid transport protein                            | TZ19_10 | TZ19_28 | OK     | 2.78423 | 59.7365 | 6.74E-08 | 2.04E-07 | yes         |
| Urocanate hydratase                                                | TZ19_10 | TZ19_28 | OK     | 8.0525  | 125.827 | 0        | 0        | yes         |
| Histidine ammonia-lyase                                            | TZ19_10 | TZ19_28 | OK     | 3.23397 | 49.7067 | 5.24E-09 | 1.73E-08 | yes         |
| Malate synthase                                                    | TZ19_10 | TZ19_28 | OK     | 313.307 | 4362.97 | 0        | 0        | yes         |
| putative integral membrane protein                                 | TZ19_10 | TZ19_28 | OK     | 17.1623 | 232.567 | 0        | 0        | yes         |
| Conserved hypothetical protein; putative exported                  | TZ19_10 | TZ19_28 | OK     | 35.2708 | 470.119 | 0        | 0        | yes         |
| ABC transporter: Substrate binding protein precursor               | TZ19_10 | TZ19_28 | OK     | 15.7751 | 174.244 | 0        | 0        | yes         |
| ABC-type sugar transport system, ATP-binding protein               | TZ19_10 | TZ19_28 | OK     | 23.8259 | 241.65  | 0        | 0        | yes         |
| Phenylalanine-4-hydroxylase                                        | TZ19_10 | TZ19_28 | OK     | 102.306 | 1027.52 | 0        | 0        | yes         |
| hypothetical protein                                               | TZ19_10 | TZ19_28 | OK     | 210.34  | 2022.54 | 4.91E-10 | 1.75E-09 | yes         |
| Aconitase A                                                        | TZ19_10 | TZ19_28 | OK     | 2.03286 | 19.5286 | 2.08E-06 | 5.47E-06 | yes         |
| Acetyl-CoA acetyltransferase                                       | TZ19_10 | TZ19_28 | OK     | 123.822 | 1091.64 | 0        | 0        | yes         |
| Glycerophosphoryl diester phosphodiesterase family protein         | TZ19_10 | TZ19_28 | OK     | 20.8565 | 182.933 | 0        | 0        | yes         |
| Hypothetical protein                                               | TZ19_10 | TZ19_28 | OK     | 212.83  | 1687.53 | 0        | 0        | yes         |
| Succinyl-CoA synthetase alpha chain                                | TZ19_10 | TZ19_28 | OK     | 973.903 | 7684.16 | 0        | 0        | yes         |
| NAD(P) transhydrogenase, beta subunit                              | TZ19_10 | TZ19_28 | OK     | 74.9464 | 587.659 | 0        | 0        | yes         |
| Oxaloacetate decarboxylase beta chain                              | TZ19_10 | TZ19_28 | OK     | 19.1997 | 149.086 | 8.44E-15 | 4.03E-14 | yes         |
| 2-oxoglutarate dehydrogenase E1 component                          | TZ19_10 | TZ19_28 | OK     | 421.557 | 3236.8  | 0        | 0        | yes         |
| succinate dehydrogenase                                            | TZ19_10 | TZ19_28 | OK     | 317.372 | 2422.3  | 0        | 0        | yes         |
| Dihydrolipoyllysine-residue succinyltransferase                    | TZ19_10 | TZ19_28 | OK     | 414.693 | 3054.46 | 0        | 0        | yes         |
| putative Sodium/sulfate symporter                                  | TZ19_10 | TZ19_28 | OK     | 4.65236 | 34.0545 | 1.98E-06 | 5.21E-06 | yes         |
| cytochrome c oxidase, subunit CcoQ                                 | TZ19_10 | TZ19_28 | OK     | 3451.77 | 24344.6 | 0        | 0        | yes         |
| ABC transporter: Substrate binding protein precursor               | TZ19_10 | TZ19_28 | OK     | 75.3839 | 517.541 | 0        | 0        | yes         |
| ABC-type multidrug transport system, ATPase and permease component | TZ19_10 | TZ19_28 | OK     | 802.614 | 5487.05 | 0        | 0        | yes         |
| cytochrome c oxidase, subunit CcoO                                 | TZ19_10 | TZ19_28 | OK     | 472.649 | 3213.36 | 0        | 0        | yes         |
| Succinylglutamic semialdehyde dehydrogenase                        | TZ19_10 | TZ19_28 | OK     | 124.142 | 843.76  | 0        | 0        | yes         |
| putative outer membrane lipoprotein                                | TZ19_10 | TZ19_28 | OK     | 49098.4 | 333017  | 0        | 0        | yes         |

|                                                                           |         |         |    |         |         |          |          |     |
|---------------------------------------------------------------------------|---------|---------|----|---------|---------|----------|----------|-----|
| hypothetical protein                                                      | TZ19_10 | TZ19_28 | OK | 289.911 | 1960.84 | 0        | 0        | yes |
| DNA-3-methyladenine glycosylase                                           | TZ19_10 | TZ19_28 | OK | 15.39   | 102.882 | 1.37E-07 | 4.03E-07 | yes |
| putative endoribonuclease                                                 | TZ19_10 | TZ19_28 | OK | 212.59  | 1376.59 | 0        | 0        | yes |
| Outer membrane protein                                                    | TZ19_10 | TZ19_28 | OK | 595.93  | 3832.53 | 0        | 0        | yes |
| putative response regulator                                               | TZ19_10 | TZ19_28 | OK | 273.367 | 1757.85 | 0        | 0        | yes |
| Glycerophosphoryl diester phosphodiesterase                               | TZ19_10 | TZ19_28 | OK | 16.8588 | 104.067 | 4.17E-07 | 1.17E-06 | yes |
| Nuclease sbcCD subunit C                                                  | TZ19_10 | TZ19_28 | OK | 3.62164 | 21.7123 | 4.20E-09 | 1.39E-08 | yes |
| Long-chain fatty acid transport protein precursor                         | TZ19_10 | TZ19_28 | OK | 15.1493 | 90.5611 | 8.32E-13 | 3.55E-12 | yes |
| Nucleoside diphosphate kinase                                             | TZ19_10 | TZ19_28 | OK | 1211.14 | 7179    | 0        | 0        | yes |
| 3-deoxy-manno-octulosonate cytidyltransferase                             | TZ19_10 | TZ19_28 | OK | 17.5477 | 103.544 | 8.53E-07 | 2.33E-06 | yes |
| Aspartate carbamoyltransferase regulatory chain                           | TZ19_10 | TZ19_28 | OK | 367.127 | 2141.3  | 0        | 0        | yes |
| tetraacyldisaccharide 4'-kinase                                           | TZ19_10 | TZ19_28 | OK | 60.9534 | 346.339 | 0        | 0        | yes |
| Malate synthase domain protein                                            | TZ19_10 | TZ19_28 | OK | 1533.58 | 8697.73 | 0        | 0        | yes |
| Acetyltransferase                                                         | TZ19_10 | TZ19_28 | OK | 37.3256 | 211.354 | 4.45E-09 | 1.47E-08 | yes |
| D-alanyl-D-alanine carboxypeptidase                                       | TZ19_10 | TZ19_28 | OK | 74.6302 | 421.851 | 0        | 0        | yes |
| ABC transporter: transmembrane protein                                    | TZ19_10 | TZ19_28 | OK | 38.6648 | 217.665 | 4.40E-14 | 2.01E-13 | yes |
| cytochrome c oxidase, subunit CcoP                                        | TZ19_10 | TZ19_28 | OK | 403.897 | 2242.77 | 0        | 0        | yes |
| Cytochrome c-type protein TorC                                            | TZ19_10 | TZ19_28 | OK | 203.258 | 1121.26 | 0        | 0        | yes |
| potassium uptake protein TrkH                                             | TZ19_10 | TZ19_28 | OK | 8.55392 | 47.1611 | 3.45E-07 | 9.75E-07 | yes |
| putative tyrosine-protein kinase (wzc)                                    | TZ19_10 | TZ19_28 | OK | 11.6208 | 63.9901 | 4.37E-14 | 2.00E-13 | yes |
| DctQ, TRAP-type C4-dicarboxylate transport system, large permease compone | TZ19_10 | TZ19_28 | OK | 10.9206 | 59.88   | 5.78E-08 | 1.75E-07 | yes |
| Catalase                                                                  | TZ19_10 | TZ19_28 | OK | 88.4654 | 483.342 | 0        | 0        | yes |
| Extracellular solute-binding protein, family 7                            | TZ19_10 | TZ19_28 | OK | 45.6275 | 248.629 | 0        | 0        | yes |
| Succinyl-CoA synthetase beta chain                                        | TZ19_10 | TZ19_28 | OK | 420.875 | 2289.52 | 0        | 0        | yes |
| hypothetical protein                                                      | TZ19_10 | TZ19_28 | OK | 17.5237 | 95.1976 | 0        | 0        | yes |
| ATP-dependent protease LA-related                                         | TZ19_10 | TZ19_28 | OK | 83.8634 | 445.555 | 0        | 0        | yes |
| Methyl-accepting chemotaxis protein                                       | TZ19_10 | TZ19_28 | OK | 15.1123 | 80.1932 | 2.22E-15 | 1.09E-14 | yes |
| Conserved hypothetical protein                                            | TZ19_10 | TZ19_28 | OK | 8.7332  | 46.1872 | 1.27E-06 | 3.41E-06 | yes |
| Conserved hypothetical protein                                            | TZ19_10 | TZ19_28 | OK | 201.331 | 1047.32 | 0        | 0        | yes |
| Hypothetical protein                                                      | TZ19_10 | TZ19_28 | OK | 34.8008 | 179.144 | 0        | 0        | yes |
| Psp operon transcriptional activator                                      | TZ19_10 | TZ19_28 | OK | 21.1131 | 107.475 | 9.69E-09 | 3.14E-08 | yes |
| napE protein                                                              | TZ19_10 | TZ19_28 | OK | 851.891 | 4278.57 | 1.45E-07 | 4.24E-07 | yes |



|                                                               |         |         |    |         |         |          |          |     |
|---------------------------------------------------------------|---------|---------|----|---------|---------|----------|----------|-----|
| ATP synthase beta chain                                       | TZ19_10 | TZ19_28 | OK | 1347.35 | 6763.37 | 0        | 0        | yes |
| putative hemolysin                                            | TZ19_10 | TZ19_28 | OK | 38.3938 | 190.521 | 0        | 0        | yes |
| Agmatinase (Agmatine ureohydrolase)                           | TZ19_10 | TZ19_28 | OK | 100.634 | 492.789 | 0        | 0        | yes |
| ATP-dependent Clp protease adaptor protein clpS               | TZ19_10 | TZ19_28 | OK | 8341.63 | 40810.8 | 0        | 0        | yes |
| putative trimethylamine-N-oxide reductase                     | TZ19_10 | TZ19_28 | OK | 308.584 | 1474.37 | 0        | 0        | yes |
| Conserved hypothetical protein                                | TZ19_10 | TZ19_28 | OK | 141.084 | 669.568 | 0        | 0        | yes |
| Malate dehydrogenase                                          | TZ19_10 | TZ19_28 | OK | 1230.74 | 5771.4  | 0        | 0        | yes |
| hypothetical protein                                          | TZ19_10 | TZ19_28 | OK | 802.149 | 3730.68 | 0        | 0        | yes |
| conserved hypothetical protein                                | TZ19_10 | TZ19_28 | OK | 72.365  | 336.428 | 1.32E-10 | 4.91E-10 | yes |
| Imidazole glycerol phosphate synthase subunit hisH            | TZ19_10 | TZ19_28 | OK | 37.5516 | 174.484 | 7.22E-08 | 2.18E-07 | yes |
| Phosphoribosylamine--glycine ligase                           | TZ19_10 | TZ19_28 | OK | 36.2395 | 168.314 | 0        | 0        | yes |
| putative sodium/hydrogen exchanger family protein             | TZ19_10 | TZ19_28 | OK | 11.3143 | 51.4512 | 3.01E-09 | 1.01E-08 | yes |
| decarboxylase family protein                                  | TZ19_10 | TZ19_28 | OK | 30.9518 | 140.718 | 4.44E-16 | 2.26E-15 | yes |
| Acyl-coenzyme A synthetases                                   | TZ19_10 | TZ19_28 | OK | 23.8115 | 107.885 | 2.22E-16 | 1.15E-15 | yes |
| hypothetical protein                                          | TZ19_10 | TZ19_28 | OK | 2353.38 | 10646.7 | 0        | 0        | yes |
| ABC transporter IM-ABC: Transmembrane and ATP binding protein | TZ19_10 | TZ19_28 | OK | 10.9742 | 49.6044 | 1.10E-09 | 3.79E-09 | yes |
| Na(+)-translocating NADH-quinone reductase subunit C          | TZ19_10 | TZ19_28 | OK | 523.529 | 2350.21 | 0        | 0        | yes |
| Polyhydroxyalkanoic acid synthase                             | TZ19_10 | TZ19_28 | OK | 772.991 | 3447.26 | 0        | 0        | yes |
| Hypothetical protein                                          | TZ19_10 | TZ19_28 | OK | 123.16  | 547.294 | 1.44E-12 | 6.07E-12 | yes |
| periplasmic nitrate reductase, cytochrome c-type protein      | TZ19_10 | TZ19_28 | OK | 747.576 | 3298    | 0        | 0        | yes |
| histidine ammonia-lyase protein                               | TZ19_10 | TZ19_28 | OK | 14.6753 | 64.4556 | 1.34E-09 | 4.60E-09 | yes |
| Periplasmic dipeptide transport protein precursor             | TZ19_10 | TZ19_28 | OK | 394.833 | 1709.34 | 0        | 0        | yes |
| Carbamoyl-phosphate synthase large chain                      | TZ19_10 | TZ19_28 | OK | 113.868 | 486.036 | 0        | 0        | yes |
| Conserved hypothetical protein                                | TZ19_10 | TZ19_28 | OK | 1263.9  | 5317.39 | 0        | 0        | yes |
| Conserved hypothetical protein                                | TZ19_10 | TZ19_28 | OK | 17.6182 | 74.1188 | 7.98E-08 | 2.40E-07 | yes |
| putative succinate dehydrogenase, flavoprotein subunit        | TZ19_10 | TZ19_28 | OK | 335.897 | 1401.91 | 0        | 0        | yes |
| Carboxypeptidase                                              | TZ19_10 | TZ19_28 | OK | 36.8773 | 153.398 | 0        | 0        | yes |
| Aspartate carbamoyltransferase                                | TZ19_10 | TZ19_28 | OK | 570.433 | 2366.28 | 0        | 0        | yes |
| 6-phosphogluconate dehydrogenase                              | TZ19_10 | TZ19_28 | OK | 352.128 | 1456.41 | 0        | 0        | yes |
| Flagellar hook-basal body complex protein fliE                | TZ19_10 | TZ19_28 | OK | 949.598 | 3897.46 | 0        | 0        | yes |
| Ketol-acid reductoisomerase                                   | TZ19_10 | TZ19_28 | OK | 265.671 | 1089.87 | 0        | 0        | yes |
| Flagellin C                                                   | TZ19_10 | TZ19_28 | OK | 189.418 | 774.695 | 0        | 0        | yes |

|                                                          |         |         |    |         |         |          |          |     |
|----------------------------------------------------------|---------|---------|----|---------|---------|----------|----------|-----|
| hypothetical protein                                     | TZ19_10 | TZ19_28 | OK | 89.1776 | 363.656 | 0        | 0        | yes |
| Glycyl-tRNA synthetase beta chain                        | TZ19_10 | TZ19_28 | OK | 72.6302 | 292.778 | 0        | 0        | yes |
| Oligopeptide transport ATP-binding protein oppF          | TZ19_10 | TZ19_28 | OK | 107.865 | 433.475 | 0        | 0        | yes |
| Transcriptional regulator, LysR family                   | TZ19_10 | TZ19_28 | OK | 55.2889 | 222.023 | 1.82E-14 | 8.54E-14 | yes |
| Protein flaG                                             | TZ19_10 | TZ19_28 | OK | 378.517 | 1512.14 | 0        | 0        | yes |
| ATP phosphoribosyltransferase                            | TZ19_10 | TZ19_28 | OK | 311.324 | 1225.23 | 0        | 0        | yes |
| Arginine N-succinyltransferase, beta chain               | TZ19_10 | TZ19_28 | OK | 165.7   | 649.541 | 0        | 0        | yes |
| putative nitrogen regulatory protein P-II family protein | TZ19_10 | TZ19_28 | OK | 123.916 | 484.881 | 1.31E-06 | 3.52E-06 | yes |
| Conserved hypothetical protein                           | TZ19_10 | TZ19_28 | OK | 66.7928 | 261.299 | 8.66E-07 | 2.36E-06 | yes |
| Conserved hypothetical protein                           | TZ19_10 | TZ19_28 | OK | 52.4126 | 203.493 | 2.34E-11 | 9.16E-11 | yes |
| Formate dehydrogenase                                    | TZ19_10 | TZ19_28 | OK | 86.1658 | 333.881 | 0        | 0        | yes |
| putative ABC transporter, ATP-binding protein            | TZ19_10 | TZ19_28 | OK | 65.5725 | 253.673 | 0        | 0        | yes |
| sodium/solute symporter                                  | TZ19_10 | TZ19_28 | OK | 33.4502 | 129.275 | 0        | 0        | yes |
| Peptide transport system permease protein sapC           | TZ19_10 | TZ19_28 | OK | 26.3082 | 101.197 | 1.17E-07 | 3.46E-07 | yes |
| Formate dehydrogenase iron-sulfur subunit                | TZ19_10 | TZ19_28 | OK | 156.756 | 599.859 | 0        | 0        | yes |
| methyl-accepting chemotaxis protein                      | TZ19_10 | TZ19_28 | OK | 18.6071 | 71.1817 | 1.25E-08 | 4.03E-08 | yes |
| Conserved hypothetical protein                           | TZ19_10 | TZ19_28 | OK | 1784.15 | 6813.38 | 0        | 0        | yes |
| Endonuclease III                                         | TZ19_10 | TZ19_28 | OK | 78.5013 | 299.457 | 3.64E-12 | 1.50E-11 | yes |
| Topoisomerase IV subunit A                               | TZ19_10 | TZ19_28 | OK | 32.5265 | 123.021 | 0        | 0        | yes |
| ATP synthase epsilon chain                               | TZ19_10 | TZ19_28 | OK | 2112.53 | 7987.95 | 0        | 0        | yes |
| Aconitate hydratase 2 (Citrate hydro-lyase 2)            | TZ19_10 | TZ19_28 | OK | 309.791 | 1165.11 | 0        | 0        | yes |
| Cysteine synthase A                                      | TZ19_10 | TZ19_28 | OK | 1207.59 | 4535.84 | 0        | 0        | yes |
| Electron transport complex protein rnfG                  | TZ19_10 | TZ19_28 | OK | 96.6544 | 362.986 | 9.51E-13 | 4.04E-12 | yes |
| Electron transport complex protein rnfD                  | TZ19_10 | TZ19_28 | OK | 19.261  | 71.4321 | 7.35E-07 | 2.02E-06 | yes |
| TPR-repeat-containing protein                            | TZ19_10 | TZ19_28 | OK | 8.00057 | 29.6651 | 3.66E-06 | 9.34E-06 | yes |
| hypothetical protein                                     | TZ19_10 | TZ19_28 | OK | 53.1138 | 195.685 | 1.27E-07 | 3.75E-07 | yes |
| Predicted ferredoxin                                     | TZ19_10 | TZ19_28 | OK | 299.133 | 1097.32 | 2.74E-09 | 9.21E-09 | yes |
| Electron transport complex protein rnfE                  | TZ19_10 | TZ19_28 | OK | 42.252  | 154.667 | 1.35E-06 | 3.62E-06 | yes |
| Formate dehydrogenase alpha chain                        | TZ19_10 | TZ19_28 | OK | 122.999 | 449.247 | 0        | 0        | yes |
| Electron transport complex protein RnfC (fragment)       | TZ19_10 | TZ19_28 | OK | 10.712  | 39.0705 | 3.57E-07 | 1.01E-06 | yes |
| Conserved hypothetical protein                           | TZ19_10 | TZ19_28 | OK | 13.0924 | 47.4599 | 0        | 0        | yes |
| ABC transporter: ATP-binding protein                     | TZ19_10 | TZ19_28 | OK | 36.6606 | 132.838 | 2.74E-06 | 7.09E-06 | yes |

|                                                                     |         |         |    |         |         |          |          |     |
|---------------------------------------------------------------------|---------|---------|----|---------|---------|----------|----------|-----|
| Beta-glucosidase                                                    | TZ19_10 | TZ19_28 | OK | 17.9789 | 65.077  | 1.58E-07 | 4.60E-07 | yes |
| Oligoribonuclease                                                   | TZ19_10 | TZ19_28 | OK | 342.943 | 1234.84 | 0        | 0        | yes |
| Citrate synthase                                                    | TZ19_10 | TZ19_28 | OK | 1026.35 | 3693.72 | 0        | 0        | yes |
| ATPase                                                              | TZ19_10 | TZ19_28 | OK | 32.1731 | 114.793 | 0        | 0        | yes |
| Phosphoenolpyruvate carboxykinase                                   | TZ19_10 | TZ19_28 | OK | 7506.93 | 26708.8 | 0        | 0        | yes |
| Secreted/periplasmic Zn-dependent peptidases,insulinase-like        | TZ19_10 | TZ19_28 | OK | 15.75   | 55.8283 | 1.42E-13 | 6.30E-13 | yes |
| Glutathione reductase                                               | TZ19_10 | TZ19_28 | OK | 238.968 | 846.232 | 0        | 0        | yes |
| aerobic respiration control sensor protein ArcB                     | TZ19_10 | TZ19_28 | OK | 50.0147 | 175.016 | 0        | 0        | yes |
| ABC transporter: Transmembrane and ATP-binding protein              | TZ19_10 | TZ19_28 | OK | 13.7617 | 48.0503 | 2.52E-06 | 6.55E-06 | yes |
| Conserved acetyl CoA synthase                                       | TZ19_10 | TZ19_28 | OK | 16.1052 | 56.1557 | 1.05E-09 | 3.64E-09 | yes |
| ubiquinol-cytochrome c reductase,cytochrome c1                      | TZ19_10 | TZ19_28 | OK | 246.244 | 855.306 | 0        | 0        | yes |
| conserved hypothetical protein                                      | TZ19_10 | TZ19_28 | OK | 543.213 | 1861.85 | 0        | 0        | yes |
| Leucyl/phenylalanyl-tRNA--protein transferase                       | TZ19_10 | TZ19_28 | OK | 67.0364 | 229.635 | 5.45E-10 | 1.93E-09 | yes |
| MoxR-like ATPase                                                    | TZ19_10 | TZ19_28 | OK | 44.5754 | 152.283 | 2.27E-11 | 8.86E-11 | yes |
| Conserved hypothetical protein                                      | TZ19_10 | TZ19_28 | OK | 279.944 | 955.247 | 0        | 0        | yes |
| Type II secretory pathway, ATPase EpsE                              | TZ19_10 | TZ19_28 | OK | 31.5213 | 106.454 | 1.43E-10 | 5.30E-10 | yes |
| putative chaperone protein dnaK (Heat shock protein 70)             | TZ19_10 | TZ19_28 | OK | 9.04719 | 30.475  | 1.35E-06 | 3.62E-06 | yes |
| Na(+)-translocating NADH-quinone reductase subunit D                | TZ19_10 | TZ19_28 | OK | 1582.95 | 5311.88 | 0        | 0        | yes |
| Tfp pilus assembly protein                                          | TZ19_10 | TZ19_28 | OK | 36.2516 | 121.467 | 8.56E-09 | 2.78E-08 | yes |
| ATP-dependent helicase                                              | TZ19_10 | TZ19_28 | OK | 29.0348 | 97.1344 | 0        | 0        | yes |
| ABC transporter: Transmembrane protein; Maltooligosaccharide uptake | TZ19_10 | TZ19_28 | OK | 172.954 | 578.175 | 0        | 0        | yes |
| putative two-component response regulator                           | TZ19_10 | TZ19_28 | OK | 18.4884 | 61.3004 | 7.01E-07 | 1.93E-06 | yes |
| ATP synthase alpha chain                                            | TZ19_10 | TZ19_28 | OK | 1260.26 | 4170.39 | 0        | 0        | yes |
| sulfate adenylate transferase, subunit 2                            | TZ19_10 | TZ19_28 | OK | 54.7455 | 180.664 | 1.41E-09 | 4.85E-09 | yes |
| DNA mismatch repair protein mutL                                    | TZ19_10 | TZ19_28 | OK | 35.2543 | 116.085 | 0        | 0        | yes |
| Oligopeptide transport ATP-binding protein oppD                     | TZ19_10 | TZ19_28 | OK | 221.927 | 730.517 | 0        | 0        | yes |
| cytochrome c-type protein                                           | TZ19_10 | TZ19_28 | OK | 191.004 | 625.032 | 4.84E-14 | 2.21E-13 | yes |
| Glutamate synthase                                                  | TZ19_10 | TZ19_28 | OK | 49.2248 | 160.691 | 1.55E-15 | 7.72E-15 | yes |
| Proline dehydrogenase                                               | TZ19_10 | TZ19_28 | OK | 135.877 | 442.337 | 0        | 0        | yes |
| Tryptophanase (L-tryptophan indole-lyase)                           | TZ19_10 | TZ19_28 | OK | 49.0342 | 158.856 | 8.88E-16 | 4.47E-15 | yes |
| Chromosome partition protein mukB                                   | TZ19_10 | TZ19_28 | OK | 41.8096 | 135.258 | 0        | 0        | yes |
| Acetoacetyl-CoA reductase                                           | TZ19_10 | TZ19_28 | OK | 892.724 | 2886.4  | 0        | 0        | yes |

|                                                                               |         |         |    |         |         |          |          |     |
|-------------------------------------------------------------------------------|---------|---------|----|---------|---------|----------|----------|-----|
| Hypothetical protein                                                          | TZ19_10 | TZ19_28 | OK | 225.938 | 730.283 | 0        | 0        | yes |
| polar flagellin                                                               | TZ19_10 | TZ19_28 | OK | 86.6043 | 277.545 | 0        | 0        | yes |
| Sodium/proline symporter                                                      | TZ19_10 | TZ19_28 | OK | 211.414 | 676.852 | 0        | 0        | yes |
| Hypothetical protein                                                          | TZ19_10 | TZ19_28 | OK | 69.1124 | 219.85  | 0        | 0        | yes |
| sigma-E factor negative regulatory protein RseA                               | TZ19_10 | TZ19_28 | OK | 2314.77 | 7362.94 | 0        | 0        | yes |
| Pyruvate kinase II                                                            | TZ19_10 | TZ19_28 | OK | 113.815 | 361.421 | 0        | 0        | yes |
| Na(+)-translocating NADH-quinone reductase subunit B                          | TZ19_10 | TZ19_28 | OK | 543.656 | 1723.8  | 0        | 0        | yes |
| Acyl-CoA dehydrogenase                                                        | TZ19_10 | TZ19_28 | OK | 70.6426 | 222.951 | 0        | 0        | yes |
| Probable amino-acid ABC transporter ATP-binding protein                       | TZ19_10 | TZ19_28 | OK | 39.4476 | 124.342 | 1.64E-06 | 4.35E-06 | yes |
| phosphoserine phosphatase                                                     | TZ19_10 | TZ19_28 | OK | 53.4991 | 168.116 | 1.18E-10 | 4.40E-10 | yes |
| Phosphoenolpyruvate synthase/pyruvate phosphate dikinase                      | TZ19_10 | TZ19_28 | OK | 51.8429 | 162.145 | 0        | 0        | yes |
| UDP-N-acetylglucosamine--N-acetylmuramyl-(pentapeptide)pyrophosphoryl-u       | TZ19_10 | TZ19_28 | OK | 64.0017 | 200.033 | 3.28E-13 | 1.43E-12 | yes |
| Aldehyde dehydrogenase                                                        | TZ19_10 | TZ19_28 | OK | 34.9754 | 109.092 | 8.46E-11 | 3.18E-10 | yes |
| Acetylglutamate kinase                                                        | TZ19_10 | TZ19_28 | OK | 79.0098 | 246.004 | 1.31E-10 | 4.86E-10 | yes |
| Conserved hypothetical protein                                                | TZ19_10 | TZ19_28 | OK | 22.4807 | 69.5506 | 2.80E-14 | 1.30E-13 | yes |
| Na(+)-translocating NADH-quinone reductase subunit F                          | TZ19_10 | TZ19_28 | OK | 515.445 | 1579.1  | 0        | 0        | yes |
| Hypothetical protein                                                          | TZ19_10 | TZ19_28 | OK | 424.261 | 1294.1  | 2.33E-09 | 7.86E-09 | yes |
| hypothetical protein                                                          | TZ19_10 | TZ19_28 | OK | 2958.97 | 8990.43 | 9.31E-07 | 2.53E-06 | yes |
| hypothetical protein                                                          | TZ19_10 | TZ19_28 | OK | 905.626 | 2746.16 | 0        | 0        | yes |
| hypothetical protein                                                          | TZ19_10 | TZ19_28 | OK | 31.8227 | 95.7057 | 9.33E-08 | 2.79E-07 | yes |
| ABC transporter: Membrane fusion protein                                      | TZ19_10 | TZ19_28 | OK | 25.6206 | 76.6191 | 9.64E-07 | 2.62E-06 | yes |
| Ubiquinol-cytochrome c reductase, cytochrome B                                | TZ19_10 | TZ19_28 | OK | 671.335 | 2002.5  | 0        | 0        | yes |
| Hypothetical protein                                                          | TZ19_10 | TZ19_28 | OK | 31.0745 | 92.6667 | 4.66E-15 | 2.26E-14 | yes |
| Transcriptional regulator                                                     | TZ19_10 | TZ19_28 | OK | 6421.44 | 19065.2 | 0        | 0        | yes |
| Cytochrome c oxidase polypeptide I homolog                                    | TZ19_10 | TZ19_28 | OK | 416.078 | 1235.1  | 0        | 0        | yes |
| Mg(2+) transport ATPase protein C                                             | TZ19_10 | TZ19_28 | OK | 167.038 | 495.608 | 6.62E-11 | 2.50E-10 | yes |
| Glutathione-regulated potassium-efflux system protein kefC (K(+)/H(+))antipor | TZ19_10 | TZ19_28 | OK | 27.353  | 80.7957 | 1.40E-09 | 4.80E-09 | yes |
| ABC transporter: substrate binding protein precursor                          | TZ19_10 | TZ19_28 | OK | 50.2213 | 148.293 | 0        | 0        | yes |
| Chemotaxis protein cheA                                                       | TZ19_10 | TZ19_28 | OK | 38.6924 | 114.068 | 0        | 0        | yes |
| Sulfite reductase                                                             | TZ19_10 | TZ19_28 | OK | 58.2846 | 171.756 | 0        | 0        | yes |
| Conserved hypothetical protein                                                | TZ19_10 | TZ19_28 | OK | 46.4946 | 135.865 | 0        | 0        | yes |
| ATP synthase delta chain                                                      | TZ19_10 | TZ19_28 | OK | 1324.48 | 3859.96 | 0        | 0        | yes |

|                                                               |         |         |    |         |         |          |          |     |
|---------------------------------------------------------------|---------|---------|----|---------|---------|----------|----------|-----|
| Cyclopropane-fatty-acyl-phospholipid synthase                 | TZ19_10 | TZ19_28 | OK | 123.51  | 359.73  | 0        | 0        | yes |
| Oligopeptide transport system permease protein oppB           | TZ19_10 | TZ19_28 | OK | 239.261 | 692.674 | 0        | 0        | yes |
| Uroporphyrin-III C-methyltransferase                          | TZ19_10 | TZ19_28 | OK | 100.8   | 291.197 | 3.81E-13 | 1.65E-12 | yes |
| D-3-phosphoglycerate dehydrogenase                            | TZ19_10 | TZ19_28 | OK | 117.163 | 336.237 | 0        | 0        | yes |
| hypothetical protein                                          | TZ19_10 | TZ19_28 | OK | 409.041 | 1169.97 | 1.64E-06 | 4.36E-06 | yes |
| Histidinol dehydrogenase                                      | TZ19_10 | TZ19_28 | OK | 47.6116 | 135.162 | 1.53E-10 | 5.66E-10 | yes |
| ATP synthase gamma chain                                      | TZ19_10 | TZ19_28 | OK | 1976.66 | 5610.82 | 0        | 0        | yes |
| putative multidrug resistance efflux pump                     | TZ19_10 | TZ19_28 | OK | 111.13  | 315.246 | 0        | 0        | yes |
| Tryptophan synthase beta chain                                | TZ19_10 | TZ19_28 | OK | 131.968 | 373.387 | 0        | 0        | yes |
| Permease of the drug-metabolite transporter (DMT) superfamily | TZ19_10 | TZ19_28 | OK | 116.808 | 330.397 | 1.78E-15 | 8.80E-15 | yes |
| ABC transporter: Substrate-binding protein precursor          | TZ19_10 | TZ19_28 | OK | 49.5232 | 139.978 | 3.52E-11 | 1.36E-10 | yes |
| Glyceraldehyde-3-phosphate dehydrogenase                      | TZ19_10 | TZ19_28 | OK | 96.9735 | 274.034 | 0        | 0        | yes |
| 6-phosphogluconolactonase                                     | TZ19_10 | TZ19_28 | OK | 131.322 | 371.047 | 1.01E-13 | 4.54E-13 | yes |
| glutamate synthase, large subunit                             | TZ19_10 | TZ19_28 | OK | 7.20772 | 20.3552 | 1.72E-06 | 4.56E-06 | yes |
| Hypothetical protein                                          | TZ19_10 | TZ19_28 | OK | 1992.6  | 5608.49 | 0        | 0        | yes |
| Nitrogen regulatory protein                                   | TZ19_10 | TZ19_28 | OK | 234.706 | 659.383 | 4.82E-12 | 1.97E-11 | yes |
| Tryptophan synthase alpha chain                               | TZ19_10 | TZ19_28 | OK | 189.618 | 532.052 | 0        | 0        | yes |
| DNA-directed RNA polymerase beta chain                        | TZ19_10 | TZ19_28 | OK | 522.191 | 1452.6  | 0        | 0        | yes |
| putative M6 secreted metalloprotease precursor                | TZ19_10 | TZ19_28 | OK | 12.24   | 34.0043 | 1.08E-06 | 2.92E-06 | yes |
| Ribosomal protein L22                                         | TZ19_10 | TZ19_28 | OK | 16888.9 | 46880.8 | 0        | 0        | yes |
| chemotaxis protein CheB                                       | TZ19_10 | TZ19_28 | OK | 35.9378 | 99.4577 | 4.01E-07 | 1.13E-06 | yes |
| Penicillin-binding protein 1A                                 | TZ19_10 | TZ19_28 | OK | 53.3716 | 147.641 | 0        | 0        | yes |
| 23S rRNA (guanosine-2'-O)-methyltransferase rlmB              | TZ19_10 | TZ19_28 | OK | 60.5379 | 166.534 | 5.65E-07 | 1.57E-06 | yes |
| hypothetical protein                                          | TZ19_10 | TZ19_28 | OK | 718.064 | 1975.04 | 1.65E-08 | 5.26E-08 | yes |
| tolA protein                                                  | TZ19_10 | TZ19_28 | OK | 36.3922 | 99.727  | 2.63E-06 | 6.81E-06 | yes |
| hypothetical protein                                          | TZ19_10 | TZ19_28 | OK | 1978.83 | 5420.63 | 0        | 0        | yes |
| Exodeoxyribonuclease V gamma chain                            | TZ19_10 | TZ19_28 | OK | 29.1119 | 79.7252 | 2.22E-16 | 1.15E-15 | yes |
| putative transporter                                          | TZ19_10 | TZ19_28 | OK | 53.1991 | 145.442 | 1.59E-12 | 6.66E-12 | yes |
| transcriptional regulator, LuxR family                        | TZ19_10 | TZ19_28 | OK | 79.8585 | 218.267 | 5.87E-07 | 1.63E-06 | yes |
| Cellodextrin-phosphorylase                                    | TZ19_10 | TZ19_28 | OK | 15.6896 | 42.8411 | 8.18E-07 | 2.24E-06 | yes |
| hypothetical protein                                          | TZ19_10 | TZ19_28 | OK | 416.265 | 1134.66 | 2.77E-08 | 8.66E-08 | yes |
| Phosphoribosylformylglycinamide synthase                      | TZ19_10 | TZ19_28 | OK | 102.199 | 278.466 | 0        | 0        | yes |

|                                                                                   |         |         |    |         |         |          |          |     |
|-----------------------------------------------------------------------------------|---------|---------|----|---------|---------|----------|----------|-----|
| 4-hydroxythreonine-4-phosphate dehydrogenase                                      | TZ19_10 | TZ19_28 | OK | 146.952 | 399.156 | 0        | 0        | yes |
| SOJ-like and chromosome partitioning protein                                      | TZ19_10 | TZ19_28 | OK | 58.025  | 157.538 | 1.83E-06 | 4.82E-06 | yes |
| Sensor protein barA                                                               | TZ19_10 | TZ19_28 | OK | 12.4197 | 33.7155 | 9.46E-07 | 2.57E-06 | yes |
| UDP-N-acetylmuramoyl-tripeptide--D-alanyl-D-alanine ligase                        | TZ19_10 | TZ19_28 | OK | 80.6976 | 216.062 | 4.66E-15 | 2.26E-14 | yes |
| Hypothetical protein                                                              | TZ19_10 | TZ19_28 | OK | 2100.72 | 5618.75 | 0        | 0        | yes |
| ABC transporter: type A secreted protein (SSA)                                    | TZ19_10 | TZ19_28 | OK | 255.507 | 683.37  | 2.02E-11 | 7.93E-11 | yes |
| Na(+)-translocating NADH-quinone reductase subunit E                              | TZ19_10 | TZ19_28 | OK | 851.909 | 2275.54 | 0        | 0        | yes |
| putative protease                                                                 | TZ19_10 | TZ19_28 | OK | 30.5632 | 81.3041 | 3.13E-13 | 1.36E-12 | yes |
| Phenylalanyl-tRNA synthetase beta chain                                           | TZ19_10 | TZ19_28 | OK | 210.633 | 558.439 | 0        | 0        | yes |
| hypothetical protein                                                              | TZ19_10 | TZ19_28 | OK | 198.951 | 527.166 | 1.98E-08 | 6.26E-08 | yes |
| Pyruvate dehydrogenase E1 component                                               | TZ19_10 | TZ19_28 | OK | 432.713 | 1143.01 | 0        | 0        | yes |
| conserved hypothetical protein                                                    | TZ19_10 | TZ19_28 | OK | 3882.81 | 10218.5 | 0        | 0        | yes |
| Fatty oxidation complex, alpha subunit                                            | TZ19_10 | TZ19_28 | OK | 243.803 | 640.42  | 0        | 0        | yes |
| Flagellar biosynthesis protein flhF                                               | TZ19_10 | TZ19_28 | OK | 45.6301 | 119.75  | 1.36E-11 | 5.43E-11 | yes |
| Ribosomal RNA small subunit methyltransferase B                                   | TZ19_10 | TZ19_28 | OK | 85.7836 | 224.089 | 0        | 0        | yes |
| type II secretory pathway, pseudopilin EpsG                                       | TZ19_10 | TZ19_28 | OK | 657.554 | 1711.24 | 0        | 0        | yes |
| hypothetical protein                                                              | TZ19_10 | TZ19_28 | OK | 112.935 | 293.244 | 4.09E-07 | 1.15E-06 | yes |
| Phosphoserine aminotransferase                                                    | TZ19_10 | TZ19_28 | OK | 171.735 | 444.524 | 0        | 0        | yes |
| Ribosomal protein S19                                                             | TZ19_10 | TZ19_28 | OK | 2730.4  | 7067.31 | 0        | 0        | yes |
| Dihydrolipoyllysine-residue acetyltransferase component of pyruvate dehydrogenase | TZ19_10 | TZ19_28 | OK | 242.527 | 626.611 | 0        | 0        | yes |
| Conserved hypothetical protein                                                    | TZ19_10 | TZ19_28 | OK | 54.7271 | 141.243 | 4.56E-07 | 1.28E-06 | yes |
| hypothetical protein                                                              | TZ19_10 | TZ19_28 | OK | 184.395 | 475.796 | 0        | 0        | yes |
| putative multidrug resistance protein                                             | TZ19_10 | TZ19_28 | OK | 15.4381 | 39.3904 | 2.77E-07 | 7.89E-07 | yes |
| 2-amino-4-hydroxy-6-hydroxymethylidihydropteridinepyrophosphokinase               | TZ19_10 | TZ19_28 | OK | 336.24  | 856.88  | 1.80E-14 | 8.44E-14 | yes |
| ABC transporter: Substrate-binding protein precursor; phosphate uptake            | TZ19_10 | TZ19_28 | OK | 1588.98 | 4047.61 | 0        | 0        | yes |
| hypothetical protein                                                              | TZ19_10 | TZ19_28 | OK | 1623.01 | 4131.11 | 0        | 0        | yes |
| 3-hydroxyisobutyrate dehydrogenase and related beta-hydroxyacid dehydrogenase     | TZ19_10 | TZ19_28 | OK | 93.7701 | 238.03  | 1.58E-10 | 5.85E-10 | yes |
| Potassium uptake protein TrkA                                                     | TZ19_10 | TZ19_28 | OK | 47.6532 | 120.847 | 3.24E-09 | 1.08E-08 | yes |
| hypothetical protein                                                              | TZ19_10 | TZ19_28 | OK | 229.271 | 580.175 | 1.76E-06 | 4.66E-06 | yes |
| ABC-type transport system                                                         | TZ19_10 | TZ19_28 | OK | 111.346 | 281.594 | 1.62E-10 | 6.00E-10 | yes |
| Iron-containing alcohol dehydrogenase                                             | TZ19_10 | TZ19_28 | OK | 204.994 | 517.722 | 0        | 0        | yes |
| Disulfide bond formation protein B                                                | TZ19_10 | TZ19_28 | OK | 127.253 | 321.018 | 8.32E-07 | 2.27E-06 | yes |

|                                                                 |         |         |    |         |         |          |          |     |
|-----------------------------------------------------------------|---------|---------|----|---------|---------|----------|----------|-----|
| putative homocysteine synthase                                  | TZ19_10 | TZ19_28 | OK | 71.3789 | 179.615 | 1.09E-11 | 4.37E-11 | yes |
| Anaerobic C4-dicarboxylate transporter                          | TZ19_10 | TZ19_28 | OK | 77.5749 | 194.512 | 2.91E-12 | 1.20E-11 | yes |
| Acyl-coenzyme A dehydrogenase                                   | TZ19_10 | TZ19_28 | OK | 16.4215 | 41.0582 | 1.62E-06 | 4.31E-06 | yes |
| hypothetical protein                                            | TZ19_10 | TZ19_28 | OK | 525.995 | 1314.99 | 0        | 0        | yes |
| Homoserine kinase                                               | TZ19_10 | TZ19_28 | OK | 85.2799 | 213.094 | 7.42E-10 | 2.60E-09 | yes |
| putative Mg <sup>2+</sup> and Co <sup>2+</sup> transporter CorB | TZ19_10 | TZ19_28 | OK | 129.484 | 323.235 | 0        | 0        | yes |
| ABC transporter: Transmembrane protein                          | TZ19_10 | TZ19_28 | OK | 37.8191 | 94.3525 | 4.61E-08 | 1.41E-07 | yes |
| Periplasmic oligopeptide-binding protein                        | TZ19_10 | TZ19_28 | OK | 1950.92 | 4862.98 | 0        | 0        | yes |
| Conserved hypothetical protein                                  | TZ19_10 | TZ19_28 | OK | 98.3934 | 245.074 | 0        | 0        | yes |
| Glutamate synthase                                              | TZ19_10 | TZ19_28 | OK | 80.7837 | 200.227 | 0        | 0        | yes |
| 3,4-dihydroxy-2-butanone 4-phosphate synthase                   | TZ19_10 | TZ19_28 | OK | 260.59  | 645.865 | 0        | 0        | yes |
| Phospho-N-acetylmuramoyl-pentapeptide-transferase               | TZ19_10 | TZ19_28 | OK | 79.0474 | 195.485 | 5.97E-09 | 1.96E-08 | yes |
| putative glutamate synthase precursor                           | TZ19_10 | TZ19_28 | OK | 74.606  | 184.341 | 4.52E-07 | 1.27E-06 | yes |
| L-threonine 3-dehydrogenase                                     | TZ19_10 | TZ19_28 | OK | 146.22  | 360.994 | 4.44E-16 | 2.26E-15 | yes |
| Conserved hypothetical protein                                  | TZ19_10 | TZ19_28 | OK | 2288.37 | 5640.92 | 0        | 0        | yes |
| Imidazole glycerol phosphate synthase subunit hisF1             | TZ19_10 | TZ19_28 | OK | 98.0342 | 241.208 | 4.40E-08 | 1.35E-07 | yes |
| Hypothetical ABC transporter ATP-binding protein                | TZ19_10 | TZ19_28 | OK | 78.9422 | 192.217 | 4.44E-16 | 2.26E-15 | yes |
| Peptidase B                                                     | TZ19_10 | TZ19_28 | OK | 233.923 | 568.598 | 0        | 0        | yes |
| Arginine deiminase                                              | TZ19_10 | TZ19_28 | OK | 111.601 | 270.943 | 3.06E-14 | 1.42E-13 | yes |
| Pyrroline-5-carboxylate reductase                               | TZ19_10 | TZ19_28 | OK | 134.218 | 325.248 | 1.76E-11 | 6.93E-11 | yes |
| Oligopeptide transport system permease protein oppC             | TZ19_10 | TZ19_28 | OK | 277.583 | 669.316 | 0        | 0        | yes |
| Exodeoxyribonuclease V beta chain                               | TZ19_10 | TZ19_28 | OK | 58.5626 | 141.096 | 0        | 0        | yes |
| 1-(5-phosphoribosyl)-5-                                         | TZ19_10 | TZ19_28 | OK | 91.5412 | 220.066 | 1.16E-06 | 3.14E-06 | yes |
| Gamma-glutamyl phosphate reductase                              | TZ19_10 | TZ19_28 | OK | 37.7682 | 90.5887 | 2.33E-06 | 6.08E-06 | yes |
| Aminopeptidase P                                                | TZ19_10 | TZ19_28 | OK | 26.8272 | 64.2119 | 1.22E-06 | 3.28E-06 | yes |
| Conserved hypothetical protein                                  | TZ19_10 | TZ19_28 | OK | 459.923 | 1097.37 | 0        | 0        | yes |
| Oligopeptidase A                                                | TZ19_10 | TZ19_28 | OK | 99.4156 | 237.012 | 0        | 0        | yes |
| AsmA protein                                                    | TZ19_10 | TZ19_28 | OK | 290.528 | 690.499 | 0        | 0        | yes |
| putative two-component sensor                                   | TZ19_10 | TZ19_28 | OK | 33.6627 | 79.9971 | 1.98E-09 | 6.75E-09 | yes |
| Anaerobic dehydrogenase                                         | TZ19_10 | TZ19_28 | OK | 428.779 | 1012.41 | 0        | 0        | yes |
| putative cytochrome b561                                        | TZ19_10 | TZ19_28 | OK | 636.742 | 1501.89 | 8.68E-07 | 2.37E-06 | yes |
| Dihydrolipoyl dehydrogenase                                     | TZ19_10 | TZ19_28 | OK | 1329.96 | 3130.54 | 0        | 0        | yes |

|                                                                   |         |         |    |          |          |          |          |     |
|-------------------------------------------------------------------|---------|---------|----|----------|----------|----------|----------|-----|
| Osmolarity sensor protein envZ                                    | TZ19_10 | TZ19_28 | OK | 55.7199  | 131.06   | 3.12E-08 | 9.68E-08 | yes |
| ABC-type Fe <sup>3+</sup> transport system, periplasmic component | TZ19_10 | TZ19_28 | OK | 2627.74  | 6165.03  | 0        | 0        | yes |
| ABC transporter: substrate-binding protein precursor (BP)         | TZ19_10 | TZ19_28 | OK | 167.541  | 392.158  | 2.22E-16 | 1.15E-15 | yes |
| chemotaxis protein CheY                                           | TZ19_10 | TZ19_28 | OK | 680.212  | 1590.43  | 5.74E-13 | 2.47E-12 | yes |
| phosphopentomutase                                                | TZ19_10 | TZ19_28 | OK | 675.52   | 1574.08  | 0        | 0        | yes |
| Pterin-4a-carbinolamine dehydratase                               | TZ19_10 | TZ19_28 | OK | 889.904  | 2062.11  | 0        | 0        | yes |
| Hypothetical protein ybbK                                         | TZ19_10 | TZ19_28 | OK | 175.825  | 407.321  | 2.22E-15 | 1.09E-14 | yes |
| Probable aminotransferase yfbQ                                    | TZ19_10 | TZ19_28 | OK | 108.536  | 250.495  | 1.28E-13 | 5.69E-13 | yes |
| N,N'-diacetylchitobiase precursor                                 | TZ19_10 | TZ19_28 | OK | 25.4834  | 58.7808  | 9.71E-08 | 2.89E-07 | yes |
| Tryptophan biosynthesis protein trpCF                             | TZ19_10 | TZ19_28 | OK | 48.4604  | 111.623  | 7.71E-08 | 2.32E-07 | yes |
| FKBP-type 16 kDa peptidyl-prolyl cis-trans isomerase              | TZ19_10 | TZ19_28 | OK | 330.068  | 755.965  | 2.89E-09 | 9.69E-09 | yes |
| Transketolase                                                     | TZ19_10 | TZ19_28 | OK | 475.994  | 1086.47  | 0        | 0        | yes |
| Cold shock-like protein cspD                                      | TZ19_10 | TZ19_28 | OK | 23772.1  | 54158.2  | 0        | 0        | yes |
| hypothetical protein                                              | TZ19_10 | TZ19_28 | OK | 873.537  | 1989.71  | 2.22E-13 | 9.77E-13 | yes |
| Guanosine-5'-triphosphate,3'-diphosphate pyrophosphatase          | TZ19_10 | TZ19_28 | OK | 160.755  | 364.598  | 0        | 0        | yes |
| Glucose-1-phosphate adenylyltransferase 1                         | TZ19_10 | TZ19_28 | OK | 576.256  | 1302.55  | 0        | 0        | yes |
| Topoisomerase IV subunit B                                        | TZ19_10 | TZ19_28 | OK | 113.613  | 256.497  | 0        | 0        | yes |
| PhoH-like protein                                                 | TZ19_10 | TZ19_28 | OK | 53.723   | 120.871  | 1.96E-06 | 5.18E-06 | yes |
| Hypothetical protein                                              | TZ19_10 | TZ19_28 | OK | 304.791  | 683.47   | 2.80E-10 | 1.02E-09 | yes |
| Ribosomal protein L2                                              | TZ19_10 | TZ19_28 | OK | 1119.77  | 2507.68  | 0        | 0        | yes |
| Ribosomal protein L23                                             | TZ19_10 | TZ19_28 | OK | 2509.57  | 5611.28  | 0        | 0        | yes |
| Fumarate reductase iron-sulfur protein                            | TZ19_10 | TZ19_28 | OK | 508.236  | 1128.5   | 0        | 0        | yes |
| putative Exodeoxyribonuclease V alpha chain                       | TZ19_10 | TZ19_28 | OK | 29.3707  | 64.9556  | 7.36E-07 | 2.03E-06 | yes |
| Small-conductance mechanosensitive channel                        | TZ19_10 | TZ19_28 | OK | 568.676  | 1251.26  | 0        | 0        | yes |
| Hypothetical protein                                              | TZ19_10 | TZ19_28 | OK | 800.78   | 1761.5   | 0        | 0        | yes |
| NifU-related protein                                              | TZ19_10 | TZ19_28 | OK | 980.489  | 2154.22  | 7.33E-15 | 3.51E-14 | yes |
| hypothetical protein                                              | TZ19_10 | TZ19_28 | OK | 2.10E+06 | 4.60E+06 | 0        | 0        | yes |
| Acetylornithine aminotransferase                                  | TZ19_10 | TZ19_28 | OK | 1198.68  | 2610.41  | 0        | 0        | yes |
| Isocitrate lyase                                                  | TZ19_10 | TZ19_28 | OK | 55.1633  | 119.715  | 5.66E-08 | 1.72E-07 | yes |
| Hypothetical protein                                              | TZ19_10 | TZ19_28 | OK | 24064.3  | 51733.8  | 0        | 0        | yes |
| similar to onerved hypothetical protein                           | TZ19_10 | TZ19_28 | OK | 180.575  | 388.088  | 1.53E-06 | 4.07E-06 | yes |
| Hypothetical acetyltransferase                                    | TZ19_10 | TZ19_28 | OK | 578.743  | 1237.05  | 2.22E-15 | 1.09E-14 | yes |



|                                                         |         |         |    |         |         |          |          |     |
|---------------------------------------------------------|---------|---------|----|---------|---------|----------|----------|-----|
| aminoacyl-histidine dipeptidase                         | TZ19_10 | TZ19_28 | OK | 306.801 | 652.803 | 0        | 0        | yes |
| Glutamine synthetase                                    | TZ19_10 | TZ19_28 | OK | 1779.42 | 3782.42 | 0        | 0        | yes |
| conserved hypothetical protein                          | TZ19_10 | TZ19_28 | OK | 10271.5 | 21814.1 | 4.12E-11 | 1.58E-10 | yes |
| ATP synthase C chain                                    | TZ19_10 | TZ19_28 | OK | 7495.33 | 15903.5 | 0        | 0        | yes |
| glycine cleavage system T protein                       | TZ19_10 | TZ19_28 | OK | 151.545 | 321.309 | 3.87E-13 | 1.68E-12 | yes |
| Hypothetical protein                                    | TZ19_10 | TZ19_28 | OK | 522.128 | 1102.94 | 3.18E-08 | 9.88E-08 | yes |
| 2-dehydro-3-deoxyphosphooctonate aldolase               | TZ19_10 | TZ19_28 | OK | 224.96  | 474.996 | 1.78E-15 | 8.80E-15 | yes |
| Conserved hypothetical protein                          | TZ19_10 | TZ19_28 | OK | 305.826 | 644.922 | 3.53E-06 | 9.03E-06 | yes |
| cold shock DNA-binding domain protein                   | TZ19_10 | TZ19_28 | OK | 15167.6 | 31749.3 | 0        | 0        | yes |
| Fumarate hydratase class I                              | TZ19_10 | TZ19_28 | OK | 398.43  | 833.603 | 0        | 0        | yes |
| Arginine deiminase                                      | TZ19_10 | TZ19_28 | OK | 3908.73 | 8151.73 | 0        | 0        | yes |
| flagellar hook-associated protein FlaH                  | TZ19_10 | TZ19_28 | OK | 112.563 | 234.752 | 0        | 0        | yes |
| Hypothetical protein                                    | TZ19_10 | TZ19_28 | OK | 884.679 | 1820.91 | 0        | 0        | yes |
| ATP synthase B chain                                    | TZ19_10 | TZ19_28 | OK | 2257.29 | 4590.51 | 0        | 0        | yes |
| hypothetical protein                                    | TZ19_10 | TZ19_28 | OK | 549.215 | 1116.26 | 6.44E-15 | 3.09E-14 | yes |
| Peptidoglycan-associated lipoprotein precursor          | TZ19_10 | TZ19_28 | OK | 3280.36 | 6664.58 | 0        | 0        | yes |
| ParA family protein                                     | TZ19_10 | TZ19_28 | OK | 1902.21 | 3860.97 | 0        | 0        | yes |
| Maltodextrin phosphorylase                              | TZ19_10 | TZ19_28 | OK | 93.2359 | 189.008 | 0        | 0        | yes |
| Sodium/alanine symporter                                | TZ19_10 | TZ19_28 | OK | 248.725 | 501.751 | 0        | 0        | yes |
| Cytochrome c-type biogenesis protein ccmF               | TZ19_10 | TZ19_28 | OK | 108.711 | 218.573 | 1.12E-13 | 4.99E-13 | yes |
| Cation-efflux pump fieF                                 | TZ19_10 | TZ19_28 | OK | 106.158 | 212.594 | 1.29E-06 | 3.46E-06 | yes |
| Fructose-1,6-bisphosphatase                             | TZ19_10 | TZ19_28 | OK | 286.239 | 572.733 | 0        | 0        | yes |
| Riboflavin biosynthesis protein ribF                    | TZ19_10 | TZ19_28 | OK | 892.355 | 445.804 | 0        | 0        | yes |
| transcriptional regulator                               | TZ19_10 | TZ19_28 | OK | 657.471 | 327.11  | 5.55E-15 | 2.68E-14 | yes |
| SspB                                                    | TZ19_10 | TZ19_28 | OK | 788.433 | 389.917 | 2.62E-09 | 8.80E-09 | yes |
| 50S ribosomal protein L14                               | TZ19_10 | TZ19_28 | OK | 36267.2 | 17922.9 | 0        | 0        | yes |
| NAD-dependent deacetylase                               | TZ19_10 | TZ19_28 | OK | 1016.02 | 501.747 | 0        | 0        | yes |
| Phosphoribosylaminoimidazole carboxylase ATPase subunit | TZ19_10 | TZ19_28 | OK | 169.177 | 83.4749 | 1.55E-06 | 4.12E-06 | yes |
| putative ATPase involved in DNA repair                  | TZ19_10 | TZ19_28 | OK | 1000.64 | 493.584 | 1.73E-11 | 6.83E-11 | yes |
| Ribosomal protein S16                                   | TZ19_10 | TZ19_28 | OK | 16442.2 | 8105.09 | 0        | 0        | yes |
| hypothetical protein                                    | TZ19_10 | TZ19_28 | OK | 1346.62 | 663.764 | 0        | 0        | yes |
| CTP synthase (UTP--ammonia ligase)                      | TZ19_10 | TZ19_28 | OK | 5187.52 | 2552.88 | 0        | 0        | yes |

|                                                         |         |         |    |         |         |          |          |     |
|---------------------------------------------------------|---------|---------|----|---------|---------|----------|----------|-----|
| ribosomal protein S6                                    | TZ19_10 | TZ19_28 | OK | 3272.78 | 1609.71 | 0        | 0        | yes |
| Hypothetical protein                                    | TZ19_10 | TZ19_28 | OK | 129.784 | 63.5415 | 1.43E-11 | 5.69E-11 | yes |
| Ribonuclease T (RNase T)                                | TZ19_10 | TZ19_28 | OK | 502.291 | 245.773 | 1.25E-10 | 4.67E-10 | yes |
| SAM-dependent methyltransferase                         | TZ19_10 | TZ19_28 | OK | 250.584 | 122.348 | 2.13E-06 | 5.58E-06 | yes |
| hypothetical protein                                    | TZ19_10 | TZ19_28 | OK | 6103.92 | 2963.52 | 0        | 0        | yes |
| putative acyl-CoA synthetase                            | TZ19_10 | TZ19_28 | OK | 3693.68 | 1766.87 | 0        | 0        | yes |
| ribosomal protein L1                                    | TZ19_10 | TZ19_28 | OK | 1776.59 | 848.336 | 0        | 0        | yes |
| Cysteinyl-tRNA synthetase                               | TZ19_10 | TZ19_28 | OK | 366.808 | 174.378 | 0        | 0        | yes |
| Hypoxanthine phosphoribosyltransferase                  | TZ19_10 | TZ19_28 | OK | 2419.81 | 1148.93 | 0        | 0        | yes |
| hypothetical protein                                    | TZ19_10 | TZ19_28 | OK | 334.701 | 158.742 | 9.17E-08 | 2.74E-07 | yes |
| hypothetical protein                                    | TZ19_10 | TZ19_28 | OK | 335.082 | 157.599 | 2.39E-08 | 7.52E-08 | yes |
| hypothetical protein                                    | TZ19_10 | TZ19_28 | OK | 497.502 | 233.988 | 6.62E-09 | 2.17E-08 | yes |
| Porphobilinogen deaminase                               | TZ19_10 | TZ19_28 | OK | 772.022 | 361.492 | 0        | 0        | yes |
| DNA repair protein RecN                                 | TZ19_10 | TZ19_28 | OK | 146.47  | 68.3221 | 5.08E-10 | 1.81E-09 | yes |
| ABC transporters: Transmembrane and ATP-binding protein | TZ19_10 | TZ19_28 | OK | 82.6457 | 38.4471 | 9.88E-07 | 2.68E-06 | yes |
| Aspartate ammonia-lyase                                 | TZ19_10 | TZ19_28 | OK | 4972.49 | 2294.67 | 0        | 0        | yes |
| Glucose-6-phosphate 1-dehydrogenase                     | TZ19_10 | TZ19_28 | OK | 363.38  | 167.682 | 0        | 0        | yes |
| 3-hydroxydecanoyl-                                      | TZ19_10 | TZ19_28 | OK | 936.565 | 428.964 | 5.62E-13 | 2.42E-12 | yes |
| putative hydrolase                                      | TZ19_10 | TZ19_28 | OK | 555.441 | 254.245 | 1.58E-07 | 4.59E-07 | yes |
| ribosome modulation factor                              | TZ19_10 | TZ19_28 | OK | 142626  | 65020.3 | 0        | 0        | yes |
| ParA family protein                                     | TZ19_10 | TZ19_28 | OK | 225.688 | 102.569 | 4.26E-11 | 1.63E-10 | yes |
| Probable monothiol glutaredoxin                         | TZ19_10 | TZ19_28 | OK | 7388.06 | 3351.53 | 0        | 0        | yes |
| hypothetical protein                                    | TZ19_10 | TZ19_28 | OK | 523.372 | 236.778 | 1.34E-06 | 3.59E-06 | yes |
| Transcription termination factor Rho                    | TZ19_10 | TZ19_28 | OK | 1963.35 | 886.839 | 0        | 0        | yes |
| 6,7-dimethyl-8-ribityllumazine synthase                 | TZ19_10 | TZ19_28 | OK | 2979.22 | 1337.69 | 0        | 0        | yes |
| Glycerol kinase                                         | TZ19_10 | TZ19_28 | OK | 240.219 | 107.731 | 1.67E-14 | 7.83E-14 | yes |
| 3-phosphoglycerate kinase part 2                        | TZ19_10 | TZ19_28 | OK | 2984.93 | 1337.22 | 0        | 0        | yes |
| putative alkaline phosphatase                           | TZ19_10 | TZ19_28 | OK | 94.6132 | 42.3043 | 1.99E-07 | 5.77E-07 | yes |
| Glutamyl-tRNA synthetase                                | TZ19_10 | TZ19_28 | OK | 1782.52 | 795.969 | 0        | 0        | yes |
| hypothetical protein                                    | TZ19_10 | TZ19_28 | OK | 34993.8 | 15604.7 | 0        | 0        | yes |
| Hypothetical protein                                    | TZ19_10 | TZ19_28 | OK | 10209.7 | 4535.49 | 2.64E-13 | 1.16E-12 | yes |
| phage shock protein B                                   | TZ19_10 | TZ19_28 | OK | 6455.25 | 2861.07 | 0        | 0        | yes |

|                                                          |         |         |    |         |         |          |          |     |
|----------------------------------------------------------|---------|---------|----|---------|---------|----------|----------|-----|
| N utilization substance protein B homolog                | TZ19_10 | TZ19_28 | OK | 2641.52 | 1169.72 | 0        | 0        | yes |
| Peptidyl-tRNA hydrolase                                  | TZ19_10 | TZ19_28 | OK | 1414.98 | 625.007 | 0        | 0        | yes |
| putative ribosomal RNA small subunit methyltransferase D | TZ19_10 | TZ19_28 | OK | 429.137 | 189.276 | 0        | 0        | yes |
| Hypothetical protein                                     | TZ19_10 | TZ19_28 | OK | 530.244 | 233.219 | 9.57E-07 | 2.60E-06 | yes |
| NADP-dependent malic enzyme                              | TZ19_10 | TZ19_28 | OK | 216.902 | 94.8647 | 1.38E-11 | 5.49E-11 | yes |
| 5;10-methylenetetrahydrofolate reductase                 | TZ19_10 | TZ19_28 | OK | 245.857 | 107.334 | 1.65E-09 | 5.63E-09 | yes |
| Phosphoenolpyruvate-protein phosphotransferase           | TZ19_10 | TZ19_28 | OK | 1902.97 | 823.855 | 0        | 0        | yes |
| tyrosyl-tRNA synthetase                                  | TZ19_10 | TZ19_28 | OK | 946.869 | 407.964 | 0        | 0        | yes |
| SspA                                                     | TZ19_10 | TZ19_28 | OK | 3898.47 | 1675.06 | 0        | 0        | yes |
| D-erythrose-4-phosphate dehydrogenase                    | TZ19_10 | TZ19_28 | OK | 1318.15 | 565.374 | 0        | 0        | yes |
| 50S ribosomal protein L21                                | TZ19_10 | TZ19_28 | OK | 32588.9 | 13908.8 | 0        | 0        | yes |
| peptide chain release factor 3                           | TZ19_10 | TZ19_28 | OK | 558.579 | 237.464 | 0        | 0        | yes |
| ribosomal large subunit pseudouridine synthase D         | TZ19_10 | TZ19_28 | OK | 928.454 | 390.27  | 0        | 0        | yes |
| Peptidyl-prolyl cis-trans isomerase B                    | TZ19_10 | TZ19_28 | OK | 5078.9  | 2134.23 | 0        | 0        | yes |
| Aerobic respiration control protein arcA                 | TZ19_10 | TZ19_28 | OK | 7883.59 | 3312.1  | 0        | 0        | yes |
| Pyruvate formate-lyase 1-activating enzyme               | TZ19_10 | TZ19_28 | OK | 600.984 | 251.154 | 4.44E-16 | 2.26E-15 | yes |
| 50S ribosomal protein L27                                | TZ19_10 | TZ19_28 | OK | 167082  | 69741.9 | 0        | 0        | yes |
| hypothetical protein                                     | TZ19_10 | TZ19_28 | OK | 71.5089 | 29.746  | 2.15E-06 | 5.62E-06 | yes |
| Transcriptional regulator                                | TZ19_10 | TZ19_28 | OK | 3046.51 | 1260.73 | 0        | 0        | yes |
| Aspartate carbamoyltransferase regulatory chain          | TZ19_10 | TZ19_28 | OK | 776.349 | 321.121 | 1.39E-11 | 5.53E-11 | yes |
| ABC transporter: Substrate binding protein precursor     | TZ19_10 | TZ19_28 | OK | 166.745 | 68.6479 | 4.42E-07 | 1.24E-06 | yes |
| conserved hypothetical protein                           | TZ19_10 | TZ19_28 | OK | 504.781 | 207.479 | 1.07E-13 | 4.79E-13 | yes |
| Hypothetical tRNA/rRNA methyltransferase                 | TZ19_10 | TZ19_28 | OK | 399.389 | 162.914 | 1.55E-06 | 4.13E-06 | yes |
| Superfamily II DNA and RNA helicase                      | TZ19_10 | TZ19_28 | OK | 386.71  | 157.1   | 0        | 0        | yes |
| Conserved hypothetical protein                           | TZ19_10 | TZ19_28 | OK | 13773.7 | 5595.44 | 0        | 0        | yes |
| hypothetical protein                                     | TZ19_10 | TZ19_28 | OK | 3926.26 | 1589    | 5.68E-14 | 2.58E-13 | yes |
| inosine guanosine kinase                                 | TZ19_10 | TZ19_28 | OK | 146.852 | 59.0937 | 5.82E-09 | 1.92E-08 | yes |
| manganese-dependent inorganic pyrophosphatase            | TZ19_10 | TZ19_28 | OK | 3197.23 | 1283.1  | 0        | 0        | yes |
| ribosomal protein L5                                     | TZ19_10 | TZ19_28 | OK | 8553.5  | 3420.56 | 0        | 0        | yes |
| Hypothetical protein                                     | TZ19_10 | TZ19_28 | OK | 32544.3 | 12935.5 | 0        | 0        | yes |
| TorCAD operon transcriptional regulatory protein torR    | TZ19_10 | TZ19_28 | OK | 917.48  | 364.602 | 0        | 0        | yes |
| putative peroxiredoxin bcp                               | TZ19_10 | TZ19_28 | OK | 522.076 | 206.622 | 1.71E-08 | 5.42E-08 | yes |

|                                                            |         |         |    |         |         |          |          |     |
|------------------------------------------------------------|---------|---------|----|---------|---------|----------|----------|-----|
| LuxT regulator                                             | TZ19_10 | TZ19_28 | OK | 1377.68 | 543.97  | 0        | 0        | yes |
| Long-chain fatty acid transport protein precursor          | TZ19_10 | TZ19_28 | OK | 770.267 | 304.086 | 0        | 0        | yes |
| Phosphoribosylaminoimidazole carboxylase catalytic subunit | TZ19_10 | TZ19_28 | OK | 439.464 | 172.964 | 1.51E-08 | 4.80E-08 | yes |
| Phospho-2-dehydro-3-deoxyheptonate aldolase, Trp-sensitive | TZ19_10 | TZ19_28 | OK | 857.076 | 336.124 | 0        | 0        | yes |
| Conserved hypothetical protein                             | TZ19_10 | TZ19_28 | OK | 401.66  | 157.339 | 0        | 0        | yes |
| transcription elongation factor GreA                       | TZ19_10 | TZ19_28 | OK | 2540.19 | 991.822 | 0        | 0        | yes |
| Conserved hypothetical protein                             | TZ19_10 | TZ19_28 | OK | 969.966 | 373.426 | 0        | 0        | yes |
| Hypothetical protein                                       | TZ19_10 | TZ19_28 | OK | 296.82  | 113.741 | 0        | 0        | yes |
| Alcohol dehydrogenase/acetaldehyde dehydrogenase           | TZ19_10 | TZ19_28 | OK | 6290.93 | 2404.76 | 0        | 0        | yes |
| hypothetical protein                                       | TZ19_10 | TZ19_28 | OK | 311.965 | 118.788 | 2.22E-16 | 1.15E-15 | yes |
| putative N-acetyl-D-glucosamine kinase                     | TZ19_10 | TZ19_28 | OK | 202.078 | 75.9033 | 1.39E-08 | 4.44E-08 | yes |
| SlyX protein                                               | TZ19_10 | TZ19_28 | OK | 1794.93 | 672.921 | 2.80E-06 | 7.23E-06 | yes |
| GMP reductase                                              | TZ19_10 | TZ19_28 | OK | 1003.07 | 373.453 | 0        | 0        | yes |
| Hypothetical protein                                       | TZ19_10 | TZ19_28 | OK | 8539.55 | 3174.1  | 0        | 0        | yes |
| 2-hydroxy-3-oxopropionate reductase                        | TZ19_10 | TZ19_28 | OK | 2295.41 | 850.828 | 0        | 0        | yes |
| Conserved hypothetical protein                             | TZ19_10 | TZ19_28 | OK | 29315   | 10808.7 | 0        | 0        | yes |
| Ribosomal protein S18                                      | TZ19_10 | TZ19_28 | OK | 11224.7 | 4138.03 | 0        | 0        | yes |
| Uridine kinase                                             | TZ19_10 | TZ19_28 | OK | 1549.07 | 565.165 | 0        | 0        | yes |
| Glucosamine-6-phosphate isomerase                          | TZ19_10 | TZ19_28 | OK | 354.653 | 129.351 | 3.13E-14 | 1.45E-13 | yes |
| Aspartokinase                                              | TZ19_10 | TZ19_28 | OK | 871.344 | 317.64  | 0        | 0        | yes |
| Transcriptional regulator                                  | TZ19_10 | TZ19_28 | OK | 277.028 | 100.939 | 1.23E-12 | 5.21E-12 | yes |
| Ribosomal protein L33                                      | TZ19_10 | TZ19_28 | OK | 101870  | 36946.3 | 0        | 0        | yes |
| nitrate/nitrite sensor protein NarQ                        | TZ19_10 | TZ19_28 | OK | 1075.56 | 389.872 | 0        | 0        | yes |
| putative SAM-dependent methyltransferase                   | TZ19_10 | TZ19_28 | OK | 161.456 | 58.2687 | 3.59E-10 | 1.29E-09 | yes |
| ribosomal protein L34                                      | TZ19_10 | TZ19_28 | OK | 75421.5 | 27176.6 | 0        | 0        | yes |
| Cell division protein BolA                                 | TZ19_10 | TZ19_28 | OK | 1595.85 | 573.84  | 5.22E-11 | 1.99E-10 | yes |
| putative alkylphosphonate uptake protein                   | TZ19_10 | TZ19_28 | OK | 1451.38 | 521.21  | 0        | 0        | yes |
| Predicted integral membrane protein                        | TZ19_10 | TZ19_28 | OK | 4982.43 | 1779.16 | 0        | 0        | yes |
| Glycine cleavage system transcriptional                    | TZ19_10 | TZ19_28 | OK | 794.186 | 283.136 | 0        | 0        | yes |
| uridine phosphorylase                                      | TZ19_10 | TZ19_28 | OK | 4668.88 | 1661.23 | 0        | 0        | yes |
| Ribonuclease D                                             | TZ19_10 | TZ19_28 | OK | 273.812 | 97.3765 | 0        | 0        | yes |
| Similar to ribosomal protein S15                           | TZ19_10 | TZ19_28 | OK | 6868.55 | 2439.98 | 0        | 0        | yes |

|                                                                               |         |         |    |         |         |          |          |     |
|-------------------------------------------------------------------------------|---------|---------|----|---------|---------|----------|----------|-----|
| ribosomal protein S21                                                         | TZ19_10 | TZ19_28 | OK | 65056.3 | 23016.6 | 0        | 0        | yes |
| hypothetical protein                                                          | TZ19_10 | TZ19_28 | OK | 271.362 | 95.6686 | 2.95E-11 | 1.15E-10 | yes |
| hypothetical protein                                                          | TZ19_10 | TZ19_28 | OK | 1610.85 | 566.792 | 7.10E-08 | 2.14E-07 | yes |
| putative transporter fused subunits of ABC superfamily: ATP-binding component | TZ19_10 | TZ19_28 | OK | 513.729 | 180.488 | 5.64E-13 | 2.43E-12 | yes |
| (3R)-hydroxymyristoyl-                                                        | TZ19_10 | TZ19_28 | OK | 286.79  | 100.753 | 6.16E-07 | 1.71E-06 | yes |
| Acetate kinase                                                                | TZ19_10 | TZ19_28 | OK | 357.066 | 125.42  | 0        | 0        | yes |
| cytosine deaminase                                                            | TZ19_10 | TZ19_28 | OK | 261.165 | 91.4353 | 0        | 0        | yes |
| Lipoprotein-releasing system transmembrane protein lolC                       | TZ19_10 | TZ19_28 | OK | 93.3225 | 32.5646 | 1.43E-07 | 4.20E-07 | yes |
| hypothetical protein                                                          | TZ19_10 | TZ19_28 | OK | 839.266 | 292.659 | 7.93E-11 | 2.99E-10 | yes |
| Dihydroorotate dehydrogenase                                                  | TZ19_10 | TZ19_28 | OK | 359.16  | 124.576 | 0        | 0        | yes |
| putative ribonuclease                                                         | TZ19_10 | TZ19_28 | OK | 280.265 | 96.8809 | 1.84E-11 | 7.23E-11 | yes |
| Phospho-2-dehydro-3-deoxyheptonate aldolase, Tyr-sensitive                    | TZ19_10 | TZ19_28 | OK | 188.324 | 65.0864 | 1.52E-11 | 6.01E-11 | yes |
| hypothetical protein                                                          | TZ19_10 | TZ19_28 | OK | 128.481 | 44.2018 | 2.74E-08 | 8.56E-08 | yes |
| Conserved hypothetical protein                                                | TZ19_10 | TZ19_28 | OK | 85.9279 | 29.5608 | 6.02E-09 | 1.98E-08 | yes |
| putative zinc uptake regulation protein                                       | TZ19_10 | TZ19_28 | OK | 2213.11 | 760.964 | 0        | 0        | yes |
| Phosphoribosylaminoimidazole-succinocarboxamide synthase                      | TZ19_10 | TZ19_28 | OK | 128.341 | 43.9204 | 7.98E-09 | 2.60E-08 | yes |
| Glutamyl-tRNA reductase                                                       | TZ19_10 | TZ19_28 | OK | 235.931 | 80.2705 | 2.22E-16 | 1.15E-15 | yes |
| ATP-dependent RNA helicase                                                    | TZ19_10 | TZ19_28 | OK | 201.713 | 68.1027 | 1.84E-14 | 8.64E-14 | yes |
| Hypothetical protein                                                          | TZ19_10 | TZ19_28 | OK | 37266.2 | 12459.7 | 0        | 0        | yes |
| ribosomal protein L11 methyltransferase                                       | TZ19_10 | TZ19_28 | OK | 421.319 | 140.383 | 0        | 0        | yes |
| putative multiple antibiotic transporter                                      | TZ19_10 | TZ19_28 | OK | 2127.4  | 704.582 | 0        | 0        | yes |
| hypothetical protein                                                          | TZ19_10 | TZ19_28 | OK | 8070.43 | 2671.05 | 0        | 0        | yes |
| Flavodoxin                                                                    | TZ19_10 | TZ19_28 | OK | 7344.73 | 2426.46 | 0        | 0        | yes |
| hypothetical protein                                                          | TZ19_10 | TZ19_28 | OK | 844.405 | 278.942 | 1.92E-13 | 8.45E-13 | yes |
| Chromosomal replication initiator protein dnaA                                | TZ19_10 | TZ19_28 | OK | 152.335 | 50.2086 | 6.36E-13 | 2.73E-12 | yes |
| Conserved hypothetical protein                                                | TZ19_10 | TZ19_28 | OK | 733195  | 241346  | 0        | 0        | yes |
| Predicted phosphatase/phosphohexomutase                                       | TZ19_10 | TZ19_28 | OK | 171.768 | 56.3224 | 1.20E-06 | 3.23E-06 | yes |
| Conserved hypothetical protein                                                | TZ19_10 | TZ19_28 | OK | 209.123 | 68.1326 | 1.58E-14 | 7.42E-14 | yes |
| Guanylate kinase                                                              | TZ19_10 | TZ19_28 | OK | 618.35  | 201.358 | 0        | 0        | yes |
| Elongation factor P                                                           | TZ19_10 | TZ19_28 | OK | 3461.62 | 1126.64 | 0        | 0        | yes |
| conserved hypothetical protein                                                | TZ19_10 | TZ19_28 | OK | 204.085 | 66.2911 | 3.52E-07 | 9.94E-07 | yes |
| putative factor-for-inversion stimulation protein                             | TZ19_10 | TZ19_28 | OK | 3592.03 | 1163.22 | 0        | 0        | yes |

|                                                              |         |         |    |         |         |          |          |     |
|--------------------------------------------------------------|---------|---------|----|---------|---------|----------|----------|-----|
| Dihydrolipoyl dehydrogenase                                  | TZ19_10 | TZ19_28 | OK | 99.6635 | 32.2661 | 4.84E-10 | 1.72E-09 | yes |
| Spermidine/putrescine-binding periplasmic protein precursor  | TZ19_10 | TZ19_28 | OK | 507.973 | 164.347 | 0        | 0        | yes |
| hypothetical protein                                         | TZ19_10 | TZ19_28 | OK | 92746   | 30000.4 | 0        | 0        | yes |
| Conserved hypothetical protein                               | TZ19_10 | TZ19_28 | OK | 782.27  | 251.186 | 1.48E-07 | 4.33E-07 | yes |
| Phenylalanyl-tRNA synthetase alpha chain                     | TZ19_10 | TZ19_28 | OK | 792.35  | 252.568 | 0        | 0        | yes |
| Conserved hypothetical protein; putative membrane protein    | TZ19_10 | TZ19_28 | OK | 540.8   | 171.675 | 2.22E-16 | 1.15E-15 | yes |
| hypothetical protein                                         | TZ19_10 | TZ19_28 | OK | 10211   | 3233.5  | 0        | 0        | yes |
| NAD-dependent aldehyde dehydrogenase                         | TZ19_10 | TZ19_28 | OK | 198.778 | 62.1134 | 0        | 0        | yes |
| Hypothetical protein                                         | TZ19_10 | TZ19_28 | OK | 2855.86 | 870.55  | 0        | 0        | yes |
| nptA protein                                                 | TZ19_10 | TZ19_28 | OK | 1373.86 | 417.687 | 0        | 0        | yes |
| putative methyl-accepting chemotaxis protein                 | TZ19_10 | TZ19_28 | OK | 156.539 | 47.3926 | 5.08E-07 | 1.42E-06 | yes |
| ATP-dependent RNA helicase, DEAD box family                  | TZ19_10 | TZ19_28 | OK | 355.181 | 107.112 | 0        | 0        | yes |
| putative ABC transporter periplasmic solute binding protein  | TZ19_10 | TZ19_28 | OK | 463.885 | 139.791 | 0        | 0        | yes |
| Organic radical activating enzyme                            | TZ19_10 | TZ19_28 | OK | 184.029 | 55.1301 | 4.09E-07 | 1.15E-06 | yes |
| Protein ybbN                                                 | TZ19_10 | TZ19_28 | OK | 118.715 | 35.545  | 3.24E-07 | 9.17E-07 | yes |
| predicted N6-adenine-specific DNA methylase                  | TZ19_10 | TZ19_28 | OK | 108.871 | 32.4556 | 2.44E-15 | 1.20E-14 | yes |
| hypothetical protein                                         | TZ19_10 | TZ19_28 | OK | 768.34  | 227.174 | 2.51E-12 | 1.04E-11 | yes |
| lipoprotein NlpI                                             | TZ19_10 | TZ19_28 | OK | 279.874 | 82.4816 | 1.33E-15 | 6.64E-15 | yes |
| hypothetical protein                                         | TZ19_10 | TZ19_28 | OK | 828.761 | 241.674 | 2.93E-08 | 9.14E-08 | yes |
| putative sulfate transporter                                 | TZ19_10 | TZ19_28 | OK | 78.9804 | 22.8005 | 6.72E-10 | 2.37E-09 | yes |
| S-adenosylmethionine:2-demethylmenaquinone methyltransferase | TZ19_10 | TZ19_28 | OK | 3186.67 | 919.402 | 0        | 0        | yes |
| Aspartate carbamoyltransferase, catalytic chain              | TZ19_10 | TZ19_28 | OK | 374.509 | 107.6   | 0        | 0        | yes |
| Pectin degradation protein                                   | TZ19_10 | TZ19_28 | OK | 1424.47 | 408.873 | 1.33E-13 | 5.91E-13 | yes |
| Preprotein translocase subunit SecE                          | TZ19_10 | TZ19_28 | OK | 23999.2 | 6783.51 | 0        | 0        | yes |
| Peptidase                                                    | TZ19_10 | TZ19_28 | OK | 435.643 | 123.02  | 0        | 0        | yes |
| Hypothetical adenine-specific methylase                      | TZ19_10 | TZ19_28 | OK | 752.671 | 212.226 | 0        | 0        | yes |
| Fructose-1,6-bisphosphatase class II glpX                    | TZ19_10 | TZ19_28 | OK | 350.572 | 97.9131 | 0        | 0        | yes |
| 3-dehydroquinate synthase                                    | TZ19_10 | TZ19_28 | OK | 2264.62 | 632.161 | 0        | 0        | yes |
| Lysine-sensitive aspartokinase III                           | TZ19_10 | TZ19_28 | OK | 225.979 | 62.7274 | 0        | 0        | yes |
| Conserved hypothetical protein                               | TZ19_10 | TZ19_28 | OK | 1435.44 | 396.311 | 0        | 0        | yes |
| conserved hypothetical protein                               | TZ19_10 | TZ19_28 | OK | 884.251 | 243.842 | 0        | 0        | yes |
| hypothetical protein                                         | TZ19_10 | TZ19_28 | OK | 2977.39 | 811.016 | 0        | 0        | yes |

|                                                                            |         |         |    |         |         |          |          |     |
|----------------------------------------------------------------------------|---------|---------|----|---------|---------|----------|----------|-----|
| Translation initiation factor IF-1                                         | TZ19_10 | TZ19_28 | OK | 27314.2 | 7435.76 | 0        | 0        | yes |
| hypothetical protein                                                       | TZ19_10 | TZ19_28 | OK | 7205.53 | 1951.25 | 0        | 0        | yes |
| Biotin synthase                                                            | TZ19_10 | TZ19_28 | OK | 92.6047 | 25.0447 | 1.15E-07 | 3.39E-07 | yes |
| hypothetical protein                                                       | TZ19_10 | TZ19_28 | OK | 692.329 | 186.636 | 8.28E-14 | 3.73E-13 | yes |
| tRNA-dihydrouridine synthase B                                             | TZ19_10 | TZ19_28 | OK | 414.768 | 111.533 | 0        | 0        | yes |
| MutT/nudix family protein                                                  | TZ19_10 | TZ19_28 | OK | 561.71  | 150.12  | 0        | 0        | yes |
| NupC family protein                                                        | TZ19_10 | TZ19_28 | OK | 2934.67 | 774.386 | 0        | 0        | yes |
| Cytochrome c biogenesis ATP-binding export protein ccmA (heme exporter pr  | TZ19_10 | TZ19_28 | OK | 498.632 | 131.404 | 0        | 0        | yes |
| Hypothetical protein                                                       | TZ19_10 | TZ19_28 | OK | 423.845 | 111.123 | 1.57E-08 | 5.01E-08 | yes |
| 50S ribosomal protein L24                                                  | TZ19_10 | TZ19_28 | OK | 25239   | 6606.14 | 0        | 0        | yes |
| 3-hydroxy-3-methylglutaryl-coenzyme A reductase                            | TZ19_10 | TZ19_28 | OK | 80.013  | 20.9105 | 9.82E-09 | 3.18E-08 | yes |
| Transcriptional activator                                                  | TZ19_10 | TZ19_28 | OK | 16507.2 | 4250.05 | 0        | 0        | yes |
| ATP-dependent RNA helicase srmB                                            | TZ19_10 | TZ19_28 | OK | 1094.22 | 279.207 | 0        | 0        | yes |
| putative protease                                                          | TZ19_10 | TZ19_28 | OK | 389.061 | 98.311  | 0        | 0        | yes |
| Chaperone protein torD                                                     | TZ19_10 | TZ19_28 | OK | 2352.79 | 591.822 | 0        | 0        | yes |
| Inosine-5'-monophosphate dehydrogenase                                     | TZ19_10 | TZ19_28 | OK | 1208.44 | 302.452 | 0        | 0        | yes |
| Transposase (orfA) of insertion sequence ISVisp4 ; IS3 family subgroup IS3 | TZ19_10 | TZ19_28 | OK | 367.534 | 90.6699 | 1.16E-08 | 3.72E-08 | yes |
| Ribosomal large subunit pseudouridine synthase F                           | TZ19_10 | TZ19_28 | OK | 529.418 | 130.484 | 0        | 0        | yes |
| putative Na <sup>+</sup> /H <sup>+</sup> antiporter                        | TZ19_10 | TZ19_28 | OK | 245.355 | 59.9065 | 0        | 0        | yes |
| Hypothetical protein                                                       | TZ19_10 | TZ19_28 | OK | 34.9394 | 8.52917 | 2.32E-07 | 6.66E-07 | yes |
| Hypothetical protein                                                       | TZ19_10 | TZ19_28 | OK | 177.319 | 42.8305 | 6.62E-09 | 2.17E-08 | yes |
| hypothetical regulatory components of sensory transduction                 | TZ19_10 | TZ19_28 | OK | 233.857 | 56.4372 | 1.33E-15 | 6.64E-15 | yes |
| Conserved hypothetical protein                                             | TZ19_10 | TZ19_28 | OK | 217.891 | 52.2324 | 1.68E-10 | 6.19E-10 | yes |
| HTH-type transcriptional repressor purR                                    | TZ19_10 | TZ19_28 | OK | 686.979 | 164.554 | 0        | 0        | yes |
| 30S ribosomal protein S20                                                  | TZ19_10 | TZ19_28 | OK | 136629  | 32550.5 | 0        | 0        | yes |
| Holliday junction DNA helicase ruvA                                        | TZ19_10 | TZ19_28 | OK | 203.145 | 47.9076 | 1.26E-07 | 3.72E-07 | yes |
| Predicted N-acetylglucosaminyl transferase                                 | TZ19_10 | TZ19_28 | OK | 263.691 | 62.1802 | 0        | 0        | yes |
| Serine--pyruvate aminotransferase                                          | TZ19_10 | TZ19_28 | OK | 70.5475 | 16.6309 | 6.53E-07 | 1.80E-06 | yes |
| Hypothetical protein                                                       | TZ19_10 | TZ19_28 | OK | 4739.18 | 1110.56 | 4.48E-10 | 1.60E-09 | yes |
| putative Na <sup>+</sup> /H <sup>+</sup> antiporter                        | TZ19_10 | TZ19_28 | OK | 116.502 | 27.2067 | 2.75E-13 | 1.20E-12 | yes |
| ATP-dependent RNA helicase                                                 | TZ19_10 | TZ19_28 | OK | 726.967 | 169.076 | 0        | 0        | yes |
| Isochorismate synthase                                                     | TZ19_10 | TZ19_28 | OK | 287.516 | 66.7023 | 0        | 0        | yes |

|                                                   |         |         |    |         |         |          |          |     |
|---------------------------------------------------|---------|---------|----|---------|---------|----------|----------|-----|
| conserved hypothetical protein                    | TZ19_10 | TZ19_28 | OK | 5951.36 | 1374.76 | 0        | 0        | yes |
| Fatty acid metabolism regulator protein           | TZ19_10 | TZ19_28 | OK | 3281    | 757.597 | 0        | 0        | yes |
| ribosomal protein S2                              | TZ19_10 | TZ19_28 | OK | 7257.49 | 1673.94 | 0        | 0        | yes |
| hypothetical protein                              | TZ19_10 | TZ19_28 | OK | 4774.62 | 1091.05 | 0        | 0        | yes |
| formate transporter 1                             | TZ19_10 | TZ19_28 | OK | 725.405 | 164.09  | 0        | 0        | yes |
| fumarate and nitrate reduction regulatory protein | TZ19_10 | TZ19_28 | OK | 5325.26 | 1202.31 | 0        | 0        | yes |
| S-adenosylmethionine synthetase                   | TZ19_10 | TZ19_28 | OK | 1082.93 | 241.214 | 0        | 0        | yes |
| Ribosomal protein L28                             | TZ19_10 | TZ19_28 | OK | 38480.6 | 8560.91 | 0        | 0        | yes |
| Similar to putative lipid carrier protein         | TZ19_10 | TZ19_28 | OK | 448.491 | 99.6776 | 1.04E-14 | 4.96E-14 | yes |
| Ribonuclease P protein component                  | TZ19_10 | TZ19_28 | OK | 645.399 | 142.884 | 1.17E-11 | 4.67E-11 | yes |
| cold shock protein                                | TZ19_10 | TZ19_28 | OK | 215904  | 47770.2 | 0        | 0        | yes |
| Conserved hypothetical protein                    | TZ19_10 | TZ19_28 | OK | 1498.03 | 329.56  | 0        | 0        | yes |
| Hypothetical protein                              | TZ19_10 | TZ19_28 | OK | 186.169 | 40.541  | 3.93E-10 | 1.41E-09 | yes |
| Hypothetical protein                              | TZ19_10 | TZ19_28 | OK | 5665.61 | 1220.93 | 0        | 0        | yes |
| hypothetical protein                              | TZ19_10 | TZ19_28 | OK | 661.778 | 141.906 | 9.25E-07 | 2.52E-06 | yes |
| conserved hypothetical protein                    | TZ19_10 | TZ19_28 | OK | 2369.42 | 496.448 | 0        | 0        | yes |
| Response regulator                                | TZ19_10 | TZ19_28 | OK | 201.883 | 41.3778 | 0        | 0        | yes |
| Adenosine deaminase                               | TZ19_10 | TZ19_28 | OK | 1004.16 | 200.476 | 0        | 0        | yes |
| hypothetical protein                              | TZ19_10 | TZ19_28 | OK | 7373.6  | 1460.91 | 2.32E-11 | 9.06E-11 | yes |
| inosine-guanosine kinase                          | TZ19_10 | TZ19_28 | OK | 75.1592 | 14.7987 | 1.29E-08 | 4.14E-08 | yes |
| Inner membrane sodium/carboxyalte symporter       | TZ19_10 | TZ19_28 | OK | 137.897 | 26.9454 | 6.22E-15 | 2.99E-14 | yes |
| Outer membrane protein                            | TZ19_10 | TZ19_28 | OK | 2426.43 | 473.666 | 0        | 0        | yes |
| Conserved DnaJ related protein                    | TZ19_10 | TZ19_28 | OK | 142.615 | 27.6222 | 7.14E-10 | 2.51E-09 | yes |
| ATP-dependent RNA helicase                        | TZ19_10 | TZ19_28 | OK | 85.8781 | 16.3962 | 5.56E-10 | 1.97E-09 | yes |
| Conserved hypothetical protein                    | TZ19_10 | TZ19_28 | OK | 512.821 | 96.9337 | 0        | 0        | yes |
| hypothetical protein                              | TZ19_10 | TZ19_28 | OK | 554.73  | 104.703 | 0        | 0        | yes |
| Conserved hypothetical protein                    | TZ19_10 | TZ19_28 | OK | 968.066 | 181.894 | 0        | 0        | yes |
| 7-cyano-7-deazaguanine reductase                  | TZ19_10 | TZ19_28 | OK | 562.965 | 104.518 | 0        | 0        | yes |
| Hypothetical protein                              | TZ19_10 | TZ19_28 | OK | 1803.3  | 332.228 | 2.46E-10 | 8.97E-10 | yes |
| hypothetical protein                              | TZ19_10 | TZ19_28 | OK | 7186.93 | 1291.43 | 0        | 0        | yes |
| hypothetical protein                              | TZ19_10 | TZ19_28 | OK | 391.967 | 69.9442 | 0        | 0        | yes |
| Predicted acetyltransferase                       | TZ19_10 | TZ19_28 | OK | 1564.27 | 278.971 | 0        | 0        | yes |



|                                                                      |         |         |    |         |         |          |          |     |
|----------------------------------------------------------------------|---------|---------|----|---------|---------|----------|----------|-----|
| Predicted Fe-S-cluster redox enzyme                                  | TZ19_10 | TZ19_28 | OK | 455.545 | 81.0237 | 0        | 0        | yes |
| putative peptidase T                                                 | TZ19_10 | TZ19_28 | OK | 477.197 | 84.6376 | 0        | 0        | yes |
| Probable tRNA(5-methylaminomethyl-2-thiouridylate)-methyltransferase | TZ19_10 | TZ19_28 | OK | 314.436 | 54.9463 | 0        | 0        | yes |
| TyrA, Chorismate mutase T-prephenate dehydrogenase                   | TZ19_10 | TZ19_28 | OK | 178.438 | 31.0741 | 8.88E-16 | 4.47E-15 | yes |
| Conserved hypothetical protein                                       | TZ19_10 | TZ19_28 | OK | 49435.9 | 8584.7  | 0        | 0        | yes |
| Deoxyribodipyrimidine photolyase-related protein                     | TZ19_10 | TZ19_28 | OK | 81.1472 | 13.9184 | 1.66E-12 | 6.95E-12 | yes |
| Para-aminobenzoate synthase component I                              | TZ19_10 | TZ19_28 | OK | 60.2227 | 10.1744 | 6.44E-09 | 2.11E-08 | yes |
| Peroxiredoxin                                                        | TZ19_10 | TZ19_28 | OK | 428.867 | 71.0819 | 2.42E-14 | 1.13E-13 | yes |
| 16S rRNA uridine-516 pseudouridylate synthase                        | TZ19_10 | TZ19_28 | OK | 491.465 | 80.5341 | 0        | 0        | yes |
| Long-chain-fatty-acid--CoA ligase                                    | TZ19_10 | TZ19_28 | OK | 187.265 | 30.1347 | 0        | 0        | yes |
| tRNA-dihydrouridine synthase A                                       | TZ19_10 | TZ19_28 | OK | 111.11  | 17.6006 | 1.45E-09 | 4.98E-09 | yes |
| UDP-N-acetylenolpyruvoylglucosamine reductase                        | TZ19_10 | TZ19_28 | OK | 156.565 | 24.5251 | 1.22E-13 | 5.44E-13 | yes |
| Ribonuclease PH                                                      | TZ19_10 | TZ19_28 | OK | 2184.6  | 339.599 | 0        | 0        | yes |
| Hypothetical protein                                                 | TZ19_10 | TZ19_28 | OK | 56.3078 | 8.66225 | 5.33E-07 | 1.48E-06 | yes |
| Dethiobiotin synthetase                                              | TZ19_10 | TZ19_28 | OK | 602.452 | 91.184  | 0        | 0        | yes |
| putative HTH-type transcriptional regulator                          | TZ19_10 | TZ19_28 | OK | 156.703 | 23.627  | 1.33E-08 | 4.26E-08 | yes |
| Hypothetical protein                                                 | TZ19_10 | TZ19_28 | OK | 36476.3 | 5437.45 | 0        | 0        | yes |
| hypothetical protein                                                 | TZ19_10 | TZ19_28 | OK | 76879.8 | 10245.2 | 0        | 0        | yes |
| Anthranilate synthase component II                                   | TZ19_10 | TZ19_28 | OK | 124.114 | 15.8169 | 1.36E-06 | 3.64E-06 | yes |
| ATP-dependent RNA helicase                                           | TZ19_10 | TZ19_28 | OK | 1900.05 | 240.402 | 0        | 0        | yes |
| putative endoribonuclease                                            | TZ19_10 | TZ19_28 | OK | 335.869 | 41.2486 | 0        | 0        | yes |
| Inositol monophosphate family protein                                | TZ19_10 | TZ19_28 | OK | 1909.82 | 230.767 | 0        | 0        | yes |
| hypothetical protein                                                 | TZ19_10 | TZ19_28 | OK | 98.2476 | 11.5191 | 4.24E-07 | 1.19E-06 | yes |
| 3-dehydroquinate dehydratase                                         | TZ19_10 | TZ19_28 | OK | 4039.07 | 471.559 | 0        | 0        | yes |
| Hemolysin III                                                        | TZ19_10 | TZ19_28 | OK | 820.455 | 95.6703 | 0        | 0        | yes |
| hypothetical protein                                                 | TZ19_10 | TZ19_28 | OK | 168.145 | 19.5382 | 5.56E-13 | 2.39E-12 | yes |
| Permease of the major facilitator superfamily                        | TZ19_10 | TZ19_28 | OK | 131.377 | 14.828  | 2.89E-15 | 1.41E-14 | yes |
| D-methionine transport ATP-binding protein metN                      | TZ19_10 | TZ19_28 | OK | 161.082 | 17.6192 | 1.33E-15 | 6.64E-15 | yes |
| Probable anaerobic C4-dicarboxylate transporter dcuC                 | TZ19_10 | TZ19_28 | OK | 181.747 | 18.8289 | 0        | 0        | yes |
| Conserved hypothetical protein                                       | TZ19_10 | TZ19_28 | OK | 525.989 | 53.2283 | 3.45E-10 | 1.24E-09 | yes |
| Orotate phosphoribosyltransferase                                    | TZ19_10 | TZ19_28 | OK | 199.25  | 19.4954 | 1.61E-10 | 5.94E-10 | yes |
| Hypothetical protein                                                 | TZ19_10 | TZ19_28 | OK | 99.2717 | 6.6716  | 1.06E-07 | 3.13E-07 | yes |

|                                       |         |         |    |         |         |          |          |     |
|---------------------------------------|---------|---------|----|---------|---------|----------|----------|-----|
| putative tricarboxylic transport TctC | TZ19_10 | TZ19_28 | OK | 321.285 | 21.1481 | 0        | 0        | yes |
| Hypothetical protein                  | TZ19_10 | TZ19_28 | OK | 9171.61 | 538.927 | 0        | 0        | yes |
| Glycerol uptake facilitator           | TZ19_10 | TZ19_28 | OK | 163.548 | 9.51572 | 4.30E-12 | 1.76E-11 | yes |
| hypothetical protein                  | TZ19_10 | TZ19_28 | OK | 16074.1 | 847.572 | 0        | 0        | yes |
| acyl-CoA desaturase                   | TZ19_10 | TZ19_28 | OK | 365.646 | 18.5974 | 0        | 0        | yes |
| Glycerol-3-phosphate dehydrogenase    | TZ19_10 | TZ19_28 | OK | 311.221 | 14.8722 | 0        | 0        | yes |
| ATPase involved in DNA repair         | TZ19_10 | TZ19_28 | OK | 3374.76 | 148.02  | 0        | 0        | yes |

Table S3 List of differentially expressed genes in strain JZ6 at 10 °C (JZ6\_10) versus strain TZ19 at 10 °C (TZ19\_10).

| Gene name                                                                  | Group1 | Group2  | States | FPKM1   | FPKM2   | E-value1 | E-value2 | Significant |
|----------------------------------------------------------------------------|--------|---------|--------|---------|---------|----------|----------|-------------|
| hypothetical protein                                                       | JZ6_10 | TZ19_10 | OK     | 26.5531 | 83062.6 | 0        | 0        | yes         |
| Polyhydroxyalkanoic acid synthase                                          | JZ6_10 | TZ19_10 | OK     | 0.57432 | 772.991 | 5.10E-12 | 2.08E-11 | yes         |
| Acetoacetyl-CoA reductase                                                  | JZ6_10 | TZ19_10 | OK     | 0.88513 | 892.724 | 2.80E-06 | 7.24E-06 | yes         |
| Hypothetical protein                                                       | JZ6_10 | TZ19_10 | OK     | 14.0388 | 4159.24 | 1.38E-14 | 6.50E-14 | yes         |
| putative tricarboxylic transport TctC                                      | JZ6_10 | TZ19_10 | OK     | 2.47798 | 321.285 | 5.04E-11 | 1.92E-10 | yes         |
| hypothetical protein                                                       | JZ6_10 | TZ19_10 | OK     | 96.2575 | 7373.6  | 4.26E-07 | 1.19E-06 | yes         |
| Hypothetical protein                                                       | JZ6_10 | TZ19_10 | OK     | 5.7217  | 432.045 | 4.72E-07 | 1.32E-06 | yes         |
| putative ABC transporter periplasmic solute binding protein                | JZ6_10 | TZ19_10 | OK     | 6.4733  | 463.885 | 0        | 0        | yes         |
| Glucosamine-6-phosphate isomerase                                          | JZ6_10 | TZ19_10 | OK     | 6.25754 | 354.653 | 1.67E-14 | 7.83E-14 | yes         |
| putative acyl-CoA synthetase                                               | JZ6_10 | TZ19_10 | OK     | 74.2214 | 3693.68 | 0        | 0        | yes         |
| putative transporter                                                       | JZ6_10 | TZ19_10 | OK     | 1.1261  | 54.2618 | 2.00E-07 | 5.79E-07 | yes         |
| ABC transporter: ATP-binding protein                                       | JZ6_10 | TZ19_10 | OK     | 14.6714 | 597.51  | 0        | 0        | yes         |
| regulator of sigma D                                                       | JZ6_10 | TZ19_10 | OK     | 262.818 | 10671.2 | 0        | 0        | yes         |
| hypothetical protein                                                       | JZ6_10 | TZ19_10 | OK     | 207.475 | 8392.93 | 2.92E-08 | 9.12E-08 | yes         |
| hypothetical protein                                                       | JZ6_10 | TZ19_10 | OK     | 667.048 | 23020.9 | 4.44E-15 | 2.16E-14 | yes         |
| cytochrome c oxidase, subunit CcoP                                         | JZ6_10 | TZ19_10 | OK     | 14.1405 | 403.897 | 0        | 0        | yes         |
| Transcriptional regulator                                                  | JZ6_10 | TZ19_10 | OK     | 32.5615 | 872.831 | 0        | 0        | yes         |
| 2-hydroxy-3-oxopropionate reductase                                        | JZ6_10 | TZ19_10 | OK     | 87.2358 | 2295.41 | 0        | 0        | yes         |
| Transposase (orfA) of insertion sequence ISVisp4 ; IS3 family subgroup IS3 | JZ6_10 | TZ19_10 | OK     | 14.8799 | 367.534 | 1.67E-08 | 5.31E-08 | yes         |
| cytochrome c oxidase, subunit CcoQ                                         | JZ6_10 | TZ19_10 | OK     | 140.985 | 3451.77 | 2.17E-06 | 5.68E-06 | yes         |
| Hypothetical protein                                                       | JZ6_10 | TZ19_10 | OK     | 377.332 | 9171.61 | 0        | 0        | yes         |
| hypothetical protein                                                       | JZ6_10 | TZ19_10 | OK     | 8286.15 | 193324  | 0        | 0        | yes         |
| MutT/nudix family protein                                                  | JZ6_10 | TZ19_10 | OK     | 24.5238 | 561.71  | 0        | 0        | yes         |
| ribosome modulation factor                                                 | JZ6_10 | TZ19_10 | OK     | 6266.19 | 142626  | 0        | 0        | yes         |
| sulfite reductase, gamma subunit-related protein                           | JZ6_10 | TZ19_10 | OK     | 73.2245 | 1609.2  | 0        | 0        | yes         |
| Conserved hypothetical protein                                             | JZ6_10 | TZ19_10 | OK     | 2288.65 | 49435.9 | 0        | 0        | yes         |
| hypothetical protein                                                       | JZ6_10 | TZ19_10 | OK     | 241.228 | 4774.62 | 0        | 0        | yes         |
| Transposase (orfA) of insertion sequence ISVisp4 ; IS3 family subgroup IS3 | JZ6_10 | TZ19_10 | OK     | 21.257  | 367.534 | 2.72E-09 | 9.13E-09 | yes         |
| melanin biosynthesis protein TyrA                                          | JZ6_10 | TZ19_10 | OK     | 25.7813 | 444.699 | 0        | 0        | yes         |

|                                                               |        |         |    |         |         |          |          |     |
|---------------------------------------------------------------|--------|---------|----|---------|---------|----------|----------|-----|
| Enoyl-CoA hydratase/isomerase                                 | JZ6_10 | TZ19_10 | OK | 17.702  | 298.206 | 0        | 0        | yes |
| Chitinase                                                     | JZ6_10 | TZ19_10 | OK | 5.51621 | 89.5651 | 0        | 0        | yes |
| Hypothetical protein                                          | JZ6_10 | TZ19_10 | OK | 350.629 | 5665.61 | 0        | 0        | yes |
| Sec-independent protein secretion pathway component TatC      | JZ6_10 | TZ19_10 | OK | 27.6126 | 443.664 | 0        | 0        | yes |
| Methylated-DNA-protein-cysteine methyltransferase             | JZ6_10 | TZ19_10 | OK | 96.9988 | 1458.46 | 4.44E-16 | 2.26E-15 | yes |
| mutT domain protein-like                                      | JZ6_10 | TZ19_10 | OK | 9.1779  | 137.716 | 3.40E-09 | 1.13E-08 | yes |
| Inositol monophosphate family protein                         | JZ6_10 | TZ19_10 | OK | 132.299 | 1909.82 | 0        | 0        | yes |
| similar to conserved hypothetical protein                     | JZ6_10 | TZ19_10 | OK | 98.1887 | 1402.59 | 3.14E-10 | 1.13E-09 | yes |
| Chromosome partition protein mukE                             | JZ6_10 | TZ19_10 | OK | 7.39181 | 104.825 | 2.05E-07 | 5.93E-07 | yes |
| putative ribonuclease                                         | JZ6_10 | TZ19_10 | OK | 20.4432 | 280.265 | 0        | 0        | yes |
| Conserved hypothetical protein                                | JZ6_10 | TZ19_10 | OK | 4.29716 | 57.8259 | 3.47E-09 | 1.16E-08 | yes |
| hypothetical protein                                          | JZ6_10 | TZ19_10 | OK | 1102.59 | 14096.7 | 0        | 0        | yes |
| Phosphoribosylaminoimidazole carboxylase catalytic subunit    | JZ6_10 | TZ19_10 | OK | 34.5005 | 439.464 | 5.55E-15 | 2.68E-14 | yes |
| Shikimate dehydrogenase                                       | JZ6_10 | TZ19_10 | OK | 95.2912 | 1186.77 | 0        | 0        | yes |
| Hypothetical protein                                          | JZ6_10 | TZ19_10 | OK | 22.3746 | 275.653 | 1.84E-08 | 5.82E-08 | yes |
| Conserved hypothetical protein                                | JZ6_10 | TZ19_10 | OK | 37.7114 | 452.956 | 0        | 0        | yes |
| Hypothetical oxidoreductase                                   | JZ6_10 | TZ19_10 | OK | 52.2316 | 583.872 | 0        | 0        | yes |
| Predicted phosphatase/phosphohexomutase                       | JZ6_10 | TZ19_10 | OK | 15.708  | 171.768 | 5.46E-10 | 1.93E-09 | yes |
| Cysteine synthase                                             | JZ6_10 | TZ19_10 | OK | 82.6176 | 874.312 | 0        | 0        | yes |
| Acetyl-CoA synthase                                           | JZ6_10 | TZ19_10 | OK | 128.971 | 1362.66 | 0        | 0        | yes |
| Conserved hypothetical protein                                | JZ6_10 | TZ19_10 | OK | 649.105 | 6836.9  | 0        | 0        | yes |
| Conserved hypothetical protein                                | JZ6_10 | TZ19_10 | OK | 17.0825 | 178.159 | 1.46E-08 | 4.67E-08 | yes |
| Histidine transport ATP-binding protein hisP                  | JZ6_10 | TZ19_10 | OK | 87.6273 | 885.702 | 0        | 0        | yes |
| Uridylate kinase                                              | JZ6_10 | TZ19_10 | OK | 135.902 | 1347.05 | 0        | 0        | yes |
| hypothetical protein                                          | JZ6_10 | TZ19_10 | OK | 1023.25 | 10083.3 | 4.44E-16 | 2.26E-15 | yes |
| Conserved hypothetical protein                                | JZ6_10 | TZ19_10 | OK | 8.73954 | 85.9279 | 4.86E-14 | 2.22E-13 | yes |
| Prolyl endopeptidase                                          | JZ6_10 | TZ19_10 | OK | 19.2166 | 187.436 | 0        | 0        | yes |
| Phosphoheptose isomerase                                      | JZ6_10 | TZ19_10 | OK | 37.4397 | 360.061 | 2.22E-16 | 1.15E-15 | yes |
| Outer membrane protein                                        | JZ6_10 | TZ19_10 | OK | 254.592 | 2426.43 | 0        | 0        | yes |
| Glycerol uptake facilitator                                   | JZ6_10 | TZ19_10 | OK | 17.4079 | 163.548 | 2.53E-12 | 1.05E-11 | yes |
| Transcriptional regulator                                     | JZ6_10 | TZ19_10 | OK | 693.87  | 6421.44 | 0        | 0        | yes |
| 5'-nucleotidase (Nucleoside 5'-monophosphatephosphohydrolase) | JZ6_10 | TZ19_10 | OK | 13.4195 | 123.824 | 4.93E-09 | 1.63E-08 | yes |

|                                                                    |        |         |    |         |         |          |          |     |
|--------------------------------------------------------------------|--------|---------|----|---------|---------|----------|----------|-----|
| hypothetical protein                                               | JZ6_10 | TZ19_10 | OK | 21.0872 | 193.044 | 7.58E-07 | 2.08E-06 | yes |
| Hypothetical protein                                               | JZ6_10 | TZ19_10 | OK | 198.154 | 1803.3  | 1.28E-13 | 5.68E-13 | yes |
| Conserved hypothetical protein                                     | JZ6_10 | TZ19_10 | OK | 218.541 | 1977.15 | 3.41E-06 | 8.74E-06 | yes |
| Outer membrane protein OmpW                                        | JZ6_10 | TZ19_10 | OK | 241.905 | 2180.56 | 0        | 0        | yes |
| putative amino-acid ABC transporter-binding protein patH precursor | JZ6_10 | TZ19_10 | OK | 62.5657 | 558.785 | 0        | 0        | yes |
| hypothetical protein                                               | JZ6_10 | TZ19_10 | OK | 43.6456 | 389.325 | 3.09E-10 | 1.12E-09 | yes |
| Peroxiredoxin                                                      | JZ6_10 | TZ19_10 | OK | 48.4815 | 428.867 | 1.22E-14 | 5.79E-14 | yes |
| Preprotein translocase subunit SecF                                | JZ6_10 | TZ19_10 | OK | 188.15  | 1644.17 | 0        | 0        | yes |
| nitrate/nitrite sensor protein NarQ                                | JZ6_10 | TZ19_10 | OK | 123.303 | 1075.56 | 0        | 0        | yes |
| Organic solvent tolerance protein                                  | JZ6_10 | TZ19_10 | OK | 10.2077 | 88.7016 | 0        | 0        | yes |
| cytosine deaminase                                                 | JZ6_10 | TZ19_10 | OK | 30.1297 | 261.165 | 0        | 0        | yes |
| Conserved hypothetical protein                                     | JZ6_10 | TZ19_10 | OK | 1168.47 | 10118.4 | 0        | 0        | yes |
| conserved hypothetical protein                                     | JZ6_10 | TZ19_10 | OK | 23.0834 | 198.372 | 6.64E-10 | 2.34E-09 | yes |
| Cob(I)yrinic acid a,c-diamide adenosyltransferase                  | JZ6_10 | TZ19_10 | OK | 16.5588 | 140.39  | 4.58E-08 | 1.40E-07 | yes |
| hypothetical protein                                               | JZ6_10 | TZ19_10 | OK | 25.0945 | 211.625 | 2.29E-14 | 1.07E-13 | yes |
| Alcohol dehydrogenase/acetaldehyde dehydrogenase                   | JZ6_10 | TZ19_10 | OK | 748.562 | 6290.93 | 0        | 0        | yes |
| Ribonuclease P protein component                                   | JZ6_10 | TZ19_10 | OK | 77.0445 | 645.399 | 7.37E-12 | 2.98E-11 | yes |
| Small heat shock protein ibpA (16 kDa heat shock protein A)        | JZ6_10 | TZ19_10 | OK | 139.761 | 1170.54 | 0        | 0        | yes |
| hypothetical protein                                               | JZ6_10 | TZ19_10 | OK | 30.6223 | 254.463 | 6.72E-08 | 2.03E-07 | yes |
| Membrane protein                                                   | JZ6_10 | TZ19_10 | OK | 1060.73 | 8798.87 | 0        | 0        | yes |
| Pectin degradation protein                                         | JZ6_10 | TZ19_10 | OK | 175.658 | 1424.47 | 0        | 0        | yes |
| conserved hypothetical protein                                     | JZ6_10 | TZ19_10 | OK | 685.931 | 5432.36 | 0        | 0        | yes |
| Oligoribonuclease                                                  | JZ6_10 | TZ19_10 | OK | 43.3578 | 342.943 | 5.02E-14 | 2.29E-13 | yes |
| Ribosome recycling factor                                          | JZ6_10 | TZ19_10 | OK | 164.059 | 1293.07 | 0        | 0        | yes |
| Lysine-sensitive aspartokinase III                                 | JZ6_10 | TZ19_10 | OK | 28.8969 | 225.979 | 0        | 0        | yes |
| putative ornithine carbamoyltransferase                            | JZ6_10 | TZ19_10 | OK | 1282.16 | 9992.93 | 0        | 0        | yes |
| tyrosyl-tRNA synthetase                                            | JZ6_10 | TZ19_10 | OK | 123.906 | 946.869 | 0        | 0        | yes |
| hypothetical protein                                               | JZ6_10 | TZ19_10 | OK | 88.6992 | 677.146 | 0        | 0        | yes |
| Hypothetical protein                                               | JZ6_10 | TZ19_10 | OK | 21.0683 | 159.354 | 5.55E-15 | 2.68E-14 | yes |
| Fructose/tagatose bisphosphate aldolase                            | JZ6_10 | TZ19_10 | OK | 1513.22 | 11429.3 | 0        | 0        | yes |
| hypothetical protein                                               | JZ6_10 | TZ19_10 | OK | 993.231 | 7434.25 | 0        | 0        | yes |
| Glycine dehydrogenase (Glycine cleavage system P-protein)          | JZ6_10 | TZ19_10 | OK | 123.87  | 926.851 | 0        | 0        | yes |

|                                                           |        |         |    |         |         |          |          |     |
|-----------------------------------------------------------|--------|---------|----|---------|---------|----------|----------|-----|
| Tellurite resistance protein                              | JZ6_10 | TZ19_10 | OK | 10.1279 | 75.1666 | 5.71E-08 | 1.73E-07 | yes |
| Exoribonuclease II                                        | JZ6_10 | TZ19_10 | OK | 126.087 | 935.719 | 0        | 0        | yes |
| Conserved hypothetical protein                            | JZ6_10 | TZ19_10 | OK | 291.751 | 2139.51 | 0        | 0        | yes |
| elongation factor Tu                                      | JZ6_10 | TZ19_10 | OK | 183.999 | 1347.98 | 0        | 0        | yes |
| cold shock protein                                        | JZ6_10 | TZ19_10 | OK | 29800.2 | 215904  | 0        | 0        | yes |
| Pantoate--beta-alanine ligase                             | JZ6_10 | TZ19_10 | OK | 57.0263 | 411.221 | 0        | 0        | yes |
| hypothetical protein                                      | JZ6_10 | TZ19_10 | OK | 119.345 | 844.405 | 0        | 0        | yes |
| Response regulator                                        | JZ6_10 | TZ19_10 | OK | 28.5952 | 201.883 | 0        | 0        | yes |
| Porphobilinogen deaminase                                 | JZ6_10 | TZ19_10 | OK | 109.641 | 772.022 | 0        | 0        | yes |
| Aromatic-amino-acid aminotransferase                      | JZ6_10 | TZ19_10 | OK | 105.744 | 738.014 | 0        | 0        | yes |
| Conserved hypothetical protein; putative membrane protein | JZ6_10 | TZ19_10 | OK | 78.9329 | 540.8   | 0        | 0        | yes |
| Dihydroorotate dehydrogenase                              | JZ6_10 | TZ19_10 | OK | 52.9231 | 359.16  | 0        | 0        | yes |
| Hypothetical protein                                      | JZ6_10 | TZ19_10 | OK | 354.245 | 2399.23 | 9.86E-07 | 2.67E-06 | yes |
| Glycerophosphoryl diester phosphodiesterase precursor     | JZ6_10 | TZ19_10 | OK | 34.9346 | 236.5   | 0        | 0        | yes |
| fumarate and nitrate reduction regulatory protein         | JZ6_10 | TZ19_10 | OK | 787.252 | 5325.26 | 0        | 0        | yes |
| Thiosulfate sulfurtransferase                             | JZ6_10 | TZ19_10 | OK | 13.8934 | 93.7214 | 2.69E-08 | 8.42E-08 | yes |
| 50S ribosomal protein L27                                 | JZ6_10 | TZ19_10 | OK | 24971.7 | 167082  | 0        | 0        | yes |
| putative response regulator                               | JZ6_10 | TZ19_10 | OK | 40.9401 | 273.367 | 2.35E-09 | 7.93E-09 | yes |
| putative sigma-54 modulation protein                      | JZ6_10 | TZ19_10 | OK | 11498   | 76729.2 | 0        | 0        | yes |
| Uncharacterized protein                                   | JZ6_10 | TZ19_10 | OK | 2098.57 | 13979.1 | 0        | 0        | yes |
| GMP synthase                                              | JZ6_10 | TZ19_10 | OK | 81.7146 | 536.193 | 0        | 0        | yes |
| ribosomal protein S2                                      | JZ6_10 | TZ19_10 | OK | 1108.51 | 7257.49 | 0        | 0        | yes |
| Conserved hypothetical protein                            | JZ6_10 | TZ19_10 | OK | 78.6222 | 512.105 | 0        | 0        | yes |
| conserved hypothetical protein                            | JZ6_10 | TZ19_10 | OK | 136.434 | 884.251 | 0        | 0        | yes |
| Cysteine synthase A                                       | JZ6_10 | TZ19_10 | OK | 186.618 | 1207.59 | 0        | 0        | yes |
| putative multiple antibiotic transporter                  | JZ6_10 | TZ19_10 | OK | 329.184 | 2127.4  | 0        | 0        | yes |
| conserved hypothetical protein                            | JZ6_10 | TZ19_10 | OK | 926.23  | 5951.36 | 0        | 0        | yes |
| PrkA serine protein kinase                                | JZ6_10 | TZ19_10 | OK | 1061.98 | 6822.81 | 0        | 0        | yes |
| hypothetical protein                                      | JZ6_10 | TZ19_10 | OK | 77.5033 | 497.502 | 0        | 0        | yes |
| 6-phospho-beta-glucosidase                                | JZ6_10 | TZ19_10 | OK | 21.5043 | 136.255 | 0        | 0        | yes |
| Universal stress protein F                                | JZ6_10 | TZ19_10 | OK | 250.887 | 1589.14 | 0        | 0        | yes |
| Conserved hypothetical protein                            | JZ6_10 | TZ19_10 | OK | 16.0457 | 100.267 | 0        | 0        | yes |

|                                                          |        |         |    |         |         |          |          |     |
|----------------------------------------------------------|--------|---------|----|---------|---------|----------|----------|-----|
| Glycerol kinase                                          | JZ6_10 | TZ19_10 | OK | 38.5067 | 240.219 | 0        | 0        | yes |
| Cystathionine beta-lyase                                 | JZ6_10 | TZ19_10 | OK | 27.9498 | 174.111 | 0        | 0        | yes |
| Transcriptional regulator, LysR family                   | JZ6_10 | TZ19_10 | OK | 22.1053 | 137.045 | 4.69E-11 | 1.79E-10 | yes |
| putative excinuclease ABC subunit C                      | JZ6_10 | TZ19_10 | OK | 19.556  | 119.96  | 6.10E-08 | 1.85E-07 | yes |
| Phosphoglycolate phosphatase                             | JZ6_10 | TZ19_10 | OK | 33.4288 | 204.873 | 5.72E-11 | 2.17E-10 | yes |
| hypothetical protein                                     | JZ6_10 | TZ19_10 | OK | 5710.2  | 34993.8 | 0        | 0        | yes |
| Oligopeptide transport system permease protein oppC      | JZ6_10 | TZ19_10 | OK | 45.6123 | 277.583 | 0        | 0        | yes |
| magnesium transporter                                    | JZ6_10 | TZ19_10 | OK | 36.9785 | 224.943 | 0        | 0        | yes |
| putative ribosomal RNA small subunit methyltransferase D | JZ6_10 | TZ19_10 | OK | 70.7785 | 429.137 | 0        | 0        | yes |
| putative lactoylglutathione lyase                        | JZ6_10 | TZ19_10 | OK | 57.9042 | 346.857 | 2.26E-09 | 7.64E-09 | yes |
| sodium-dependent transporter                             | JZ6_10 | TZ19_10 | OK | 85.2107 | 509.243 | 0        | 0        | yes |
| hypothetical protein                                     | JZ6_10 | TZ19_10 | OK | 93.0104 | 554.73  | 0        | 0        | yes |
| Para-aminobenzoate synthase component I                  | JZ6_10 | TZ19_10 | OK | 10.1187 | 60.2227 | 1.05E-08 | 3.38E-08 | yes |
| hypothetical protein                                     | JZ6_10 | TZ19_10 | OK | 3038.92 | 17979.1 | 0        | 0        | yes |
| hypothetical protein                                     | JZ6_10 | TZ19_10 | OK | 31.0257 | 183.17  | 1.72E-08 | 5.44E-08 | yes |
| 2-dehydro-3-deoxygluconokinase                           | JZ6_10 | TZ19_10 | OK | 81.8015 | 481.896 | 0        | 0        | yes |
| Septum site-determining protein minC                     | JZ6_10 | TZ19_10 | OK | 48.2176 | 279.526 | 7.04E-14 | 3.18E-13 | yes |
| hypothetical protein                                     | JZ6_10 | TZ19_10 | OK | 1088.46 | 6288.03 | 2.98E-08 | 9.27E-08 | yes |
| Hypothetical protein                                     | JZ6_10 | TZ19_10 | OK | 60.5725 | 349.679 | 6.66E-16 | 3.37E-15 | yes |
| 3-dehydroquinase dehydratase                             | JZ6_10 | TZ19_10 | OK | 700.151 | 4039.07 | 0        | 0        | yes |
| Adenylate kinase                                         | JZ6_10 | TZ19_10 | OK | 398.277 | 2295.51 | 0        | 0        | yes |
| Glycyl-tRNA synthetase alpha chain                       | JZ6_10 | TZ19_10 | OK | 36.7181 | 210.635 | 1.11E-15 | 5.56E-15 | yes |
| Aldehyde dehydrogenase                                   | JZ6_10 | TZ19_10 | OK | 25.32   | 144.766 | 0        | 0        | yes |
| Zinc-binding dehydrogenase                               | JZ6_10 | TZ19_10 | OK | 278.749 | 1577.35 | 0        | 0        | yes |
| Flagellar basal-body rod protein flgF                    | JZ6_10 | TZ19_10 | OK | 20.6809 | 116.452 | 3.51E-08 | 1.09E-07 | yes |
| hypothetical protein                                     | JZ6_10 | TZ19_10 | OK | 190.851 | 1074.13 | 0        | 0        | yes |
| Transcriptional activator                                | JZ6_10 | TZ19_10 | OK | 2942.99 | 16507.2 | 0        | 0        | yes |
| Inosine-5'-monophosphate dehydrogenase                   | JZ6_10 | TZ19_10 | OK | 215.868 | 1208.44 | 0        | 0        | yes |
| Protein grpE (HSP-70 cofactor)                           | JZ6_10 | TZ19_10 | OK | 309.826 | 1728.13 | 0        | 0        | yes |
| Fumarate reductase subunit C                             | JZ6_10 | TZ19_10 | OK | 1058.09 | 5888.2  | 0        | 0        | yes |
| hypothetical protein                                     | JZ6_10 | TZ19_10 | OK | 157.956 | 873.537 | 1.27E-12 | 5.34E-12 | yes |
| 6-phosphofructokinase                                    | JZ6_10 | TZ19_10 | OK | 1365.87 | 7516.92 | 0        | 0        | yes |

|                                                               |        |         |    |         |         |          |          |     |
|---------------------------------------------------------------|--------|---------|----|---------|---------|----------|----------|-----|
| Acetolactate synthase isozyme II large subunit                | JZ6_10 | TZ19_10 | OK | 13.1651 | 72.4363 | 2.76E-12 | 1.14E-11 | yes |
| Conserved hypothetical protein                                | JZ6_10 | TZ19_10 | OK | 272.448 | 1498.03 | 0        | 0        | yes |
| Bifunctional purine biosynthesis protein purH                 | JZ6_10 | TZ19_10 | OK | 63.4492 | 346.199 | 0        | 0        | yes |
| hypothetical protein                                          | JZ6_10 | TZ19_10 | OK | 50.0731 | 271.362 | 1.55E-15 | 7.72E-15 | yes |
| HTH-type transcriptional regulator cysB                       | JZ6_10 | TZ19_10 | OK | 15.5989 | 84.5177 | 1.44E-07 | 4.23E-07 | yes |
| Serine hydroxymethyltransferase 1                             | JZ6_10 | TZ19_10 | OK | 146.748 | 792.791 | 0        | 0        | yes |
| 3-dehydroquinase synthase                                     | JZ6_10 | TZ19_10 | OK | 422.369 | 2264.62 | 0        | 0        | yes |
| Hypothetical protein                                          | JZ6_10 | TZ19_10 | OK | 331.837 | 1773.58 | 3.77E-12 | 1.55E-11 | yes |
| Permease of the drug-metabolite transporter (DMT) superfamily | JZ6_10 | TZ19_10 | OK | 21.8879 | 116.808 | 9.29E-09 | 3.02E-08 | yes |
| Conserved hypothetical protein                                | JZ6_10 | TZ19_10 | OK | 21.3375 | 113.289 | 2.86E-10 | 1.04E-09 | yes |
| hypothetical protein                                          | JZ6_10 | TZ19_10 | OK | 63.3386 | 334.701 | 0        | 0        | yes |
| hypothetical protein                                          | JZ6_10 | TZ19_10 | OK | 1301.17 | 6870.14 | 0        | 0        | yes |
| Pterin-4a-carbinolamine dehydratase                           | JZ6_10 | TZ19_10 | OK | 169.297 | 889.904 | 0        | 0        | yes |
| hypothetical protein                                          | JZ6_10 | TZ19_10 | OK | 186.715 | 973.518 | 2.22E-16 | 1.15E-15 | yes |
| NAD-dependent malic enzyme                                    | JZ6_10 | TZ19_10 | OK | 61.0781 | 315.721 | 0        | 0        | yes |
| Ubiquinol-cytochrome c reductase, cytochrome B                | JZ6_10 | TZ19_10 | OK | 130.049 | 671.335 | 0        | 0        | yes |
| Transcriptional regulator, TetR family                        | JZ6_10 | TZ19_10 | OK | 57.1252 | 292.405 | 4.02E-13 | 1.74E-12 | yes |
| FKBP-type peptidyl-prolyl cis-trans isomerases 1              | JZ6_10 | TZ19_10 | OK | 940.122 | 4758.67 | 0        | 0        | yes |
| Shikimate kinase                                              | JZ6_10 | TZ19_10 | OK | 659.285 | 3335.67 | 0        | 0        | yes |
| NAD-dependent deacetylase                                     | JZ6_10 | TZ19_10 | OK | 201.06  | 1016.02 | 0        | 0        | yes |
| putative hydrolase                                            | JZ6_10 | TZ19_10 | OK | 110.034 | 555.441 | 4.44E-16 | 2.26E-15 | yes |
| NAD-dependent aldehyde dehydrogenase                          | JZ6_10 | TZ19_10 | OK | 39.4764 | 198.778 | 0        | 0        | yes |
| cation transport ATPase                                       | JZ6_10 | TZ19_10 | OK | 4.95241 | 24.8636 | 2.42E-06 | 6.31E-06 | yes |
| Hypothetical protein                                          | JZ6_10 | TZ19_10 | OK | 84.5167 | 423.845 | 2.79E-10 | 1.01E-09 | yes |
| Hypothetical protein                                          | JZ6_10 | TZ19_10 | OK | 6.98058 | 34.9394 | 4.42E-08 | 1.36E-07 | yes |
| Transcriptional regulator                                     | JZ6_10 | TZ19_10 | OK | 92.2079 | 460.545 | 0        | 0        | yes |
| Protein seqA                                                  | JZ6_10 | TZ19_10 | OK | 2566.76 | 12644.1 | 0        | 0        | yes |
| Conserved hypothetical protein                                | JZ6_10 | TZ19_10 | OK | 62.1656 | 305.826 | 8.14E-07 | 2.23E-06 | yes |
| hypothetical protein                                          | JZ6_10 | TZ19_10 | OK | 78.6722 | 386.401 | 2.76E-06 | 7.14E-06 | yes |
| Conserved hypothetical protein                                | JZ6_10 | TZ19_10 | OK | 146.678 | 719.111 | 0        | 0        | yes |
| hypothetical protein                                          | JZ6_10 | TZ19_10 | OK | 152.528 | 744.84  | 9.78E-08 | 2.91E-07 | yes |
| hypothetical protein                                          | JZ6_10 | TZ19_10 | OK | 20.1261 | 98.2476 | 1.65E-06 | 4.37E-06 | yes |



|                                                              |        |         |    |         |         |          |          |     |
|--------------------------------------------------------------|--------|---------|----|---------|---------|----------|----------|-----|
| hypothetical protein                                         | JZ6_10 | TZ19_10 | OK | 80.5721 | 392.941 | 2.01E-10 | 7.37E-10 | yes |
| Conserved hypothetical protein                               | JZ6_10 | TZ19_10 | OK | 308.352 | 1496.22 | 2.22E-16 | 1.15E-15 | yes |
| Glycyl-tRNA synthetase beta chain                            | JZ6_10 | TZ19_10 | OK | 15.21   | 72.6302 | 2.02E-14 | 9.46E-14 | yes |
| Probable ATP-dependent helicase dinG                         | JZ6_10 | TZ19_10 | OK | 14.4116 | 68.4492 | 2.89E-13 | 1.26E-12 | yes |
| Oligopeptide transport system permease protein oppB          | JZ6_10 | TZ19_10 | OK | 50.3975 | 239.261 | 4.44E-16 | 2.26E-15 | yes |
| hypothetical protein                                         | JZ6_10 | TZ19_10 | OK | 187.079 | 884.383 | 0        | 0        | yes |
| conserved hypothetical protein                               | JZ6_10 | TZ19_10 | OK | 43.2305 | 204.085 | 2.29E-09 | 7.73E-09 | yes |
| ADP compounds hydrolase nudE                                 | JZ6_10 | TZ19_10 | OK | 67.077  | 314.732 | 2.02E-11 | 7.91E-11 | yes |
| Conserved hypothetical protein                               | JZ6_10 | TZ19_10 | OK | 23.3298 | 109.34  | 3.31E-06 | 8.50E-06 | yes |
| Lipoyl synthase                                              | JZ6_10 | TZ19_10 | OK | 91.6574 | 429.302 | 0        | 0        | yes |
| dipeptide/tripeptide permease                                | JZ6_10 | TZ19_10 | OK | 26.9772 | 126.308 | 3.33E-15 | 1.62E-14 | yes |
| peptide ABC transporter, periplasmic peptide-binding protein | JZ6_10 | TZ19_10 | OK | 88.9511 | 413.258 | 0        | 0        | yes |
| L-serine dehydratase 1                                       | JZ6_10 | TZ19_10 | OK | 30.9238 | 143.275 | 1.33E-15 | 6.64E-15 | yes |
| Methionine Repressor metJ                                    | JZ6_10 | TZ19_10 | OK | 397.419 | 1834.01 | 0        | 0        | yes |
| ATP-dependent DNA helicase recG                              | JZ6_10 | TZ19_10 | OK | 15.3697 | 70.7837 | 1.38E-13 | 6.14E-13 | yes |
| uridine phosphorylase                                        | JZ6_10 | TZ19_10 | OK | 1013.81 | 4668.88 | 0        | 0        | yes |
| Hypothetical protein                                         | JZ6_10 | TZ19_10 | OK | 7122.06 | 32544.3 | 0        | 0        | yes |
| conserved hypothetical protein                               | JZ6_10 | TZ19_10 | OK | 162.937 | 741.855 | 0        | 0        | yes |
| Sec-independent protein translocase protein tatB homolog     | JZ6_10 | TZ19_10 | OK | 1826.73 | 8305.29 | 0        | 0        | yes |
| ATPase involved in DNA repair                                | JZ6_10 | TZ19_10 | OK | 743.246 | 3374.76 | 0        | 0        | yes |
| Conserved hypothetical protein                               | JZ6_10 | TZ19_10 | OK | 37.0487 | 167.48  | 1.27E-13 | 5.65E-13 | yes |
| 5;10-methylenetetrahydrofolate reductase                     | JZ6_10 | TZ19_10 | OK | 54.3923 | 245.857 | 0        | 0        | yes |
| hypothetical protein                                         | JZ6_10 | TZ19_10 | OK | 58.9133 | 266.199 | 2.59E-10 | 9.44E-10 | yes |
| Uracil phosphoribosyltransferase                             | JZ6_10 | TZ19_10 | OK | 594.99  | 2688.15 | 0        | 0        | yes |
| Conserved hypothetical protein                               | JZ6_10 | TZ19_10 | OK | 177.953 | 801.214 | 0        | 0        | yes |
| Phenylalanyl-tRNA synthetase alpha chain                     | JZ6_10 | TZ19_10 | OK | 176.588 | 792.35  | 0        | 0        | yes |
| Methionine aminopeptidase                                    | JZ6_10 | TZ19_10 | OK | 317.713 | 1415.13 | 0        | 0        | yes |
| Hypothetical Iron-sulfur protein                             | JZ6_10 | TZ19_10 | OK | 461.995 | 2054.34 | 1.78E-15 | 8.80E-15 | yes |
| Ribosomal protein L22                                        | JZ6_10 | TZ19_10 | OK | 3809.32 | 16888.9 | 0        | 0        | yes |
| Glutamine synthetase                                         | JZ6_10 | TZ19_10 | OK | 403.686 | 1779.42 | 0        | 0        | yes |
| carbonic anhydrase, family 3                                 | JZ6_10 | TZ19_10 | OK | 207.025 | 911.013 | 0        | 0        | yes |
| Signal transduction histidine kinase                         | JZ6_10 | TZ19_10 | OK | 8.62858 | 37.7747 | 3.06E-06 | 7.87E-06 | yes |

|                                                            |        |         |    |         |         |          |          |     |
|------------------------------------------------------------|--------|---------|----|---------|---------|----------|----------|-----|
| Adenylosuccinate lyase                                     | JZ6_10 | TZ19_10 | OK | 142.699 | 621.631 | 0        | 0        | yes |
| Probable (di)nucleoside polyphosphate hydrolase            | JZ6_10 | TZ19_10 | OK | 1857.55 | 8083.8  | 0        | 0        | yes |
| Alpha/beta hydrolase fold                                  | JZ6_10 | TZ19_10 | OK | 90.1819 | 391.785 | 0        | 0        | yes |
| Transcriptional regulator                                  | JZ6_10 | TZ19_10 | OK | 30.2222 | 131.072 | 2.91E-06 | 7.51E-06 | yes |
| Serine transporter                                         | JZ6_10 | TZ19_10 | OK | 75.0097 | 323.792 | 0        | 0        | yes |
| putative acetoin utilization protein                       | JZ6_10 | TZ19_10 | OK | 303.152 | 1296.68 | 0        | 0        | yes |
| Sua5/YciO/YrdC family protein                              | JZ6_10 | TZ19_10 | OK | 46.2658 | 196.706 | 7.48E-08 | 2.25E-07 | yes |
| Succinate dehydrogenase cytochrome                         | JZ6_10 | TZ19_10 | OK | 1310.71 | 5552.86 | 0        | 0        | yes |
| Hypothetical UPF0274 protein                               | JZ6_10 | TZ19_10 | OK | 139.963 | 592.631 | 0        | 0        | yes |
| Phospho-2-dehydro-3-deoxyheptonate aldolase, Tyr-sensitive | JZ6_10 | TZ19_10 | OK | 44.9173 | 188.324 | 2.44E-15 | 1.20E-14 | yes |
| hypothetical protein                                       | JZ6_10 | TZ19_10 | OK | 183.473 | 768.34  | 1.71E-14 | 8.04E-14 | yes |
| general secretion pathway protein N                        | JZ6_10 | TZ19_10 | OK | 22.7358 | 94.87   | 3.63E-06 | 9.28E-06 | yes |
| Probable monothiol glutaredoxin                            | JZ6_10 | TZ19_10 | OK | 1775.81 | 7388.06 | 0        | 0        | yes |
| 3-isopropylmalate dehydratase small subunit                | JZ6_10 | TZ19_10 | OK | 61.5129 | 255.688 | 2.69E-10 | 9.78E-10 | yes |
| Hypothetical protein                                       | JZ6_10 | TZ19_10 | OK | 689.958 | 2855.86 | 0        | 0        | yes |
| putative O-methyltransferase                               | JZ6_10 | TZ19_10 | OK | 31.4989 | 130.068 | 3.68E-11 | 1.42E-10 | yes |
| sodium/solute symporter                                    | JZ6_10 | TZ19_10 | OK | 8.11371 | 33.4502 | 3.74E-06 | 9.54E-06 | yes |
| Thioredoxin reductase                                      | JZ6_10 | TZ19_10 | OK | 82.2432 | 338.785 | 0        | 0        | yes |
| Ferredoxin                                                 | JZ6_10 | TZ19_10 | OK | 294.377 | 1212.33 | 1.45E-07 | 4.23E-07 | yes |
| Aspartokinase                                              | JZ6_10 | TZ19_10 | OK | 211.735 | 871.344 | 0        | 0        | yes |
| Threonine aldolase                                         | JZ6_10 | TZ19_10 | OK | 18.2453 | 74.8262 | 1.69E-06 | 4.49E-06 | yes |
| peroxiredoxin family protein/glutaredoxin                  | JZ6_10 | TZ19_10 | OK | 492.977 | 2018.76 | 0        | 0        | yes |
| formate transporter 1                                      | JZ6_10 | TZ19_10 | OK | 177.88  | 725.405 | 0        | 0        | yes |
| ribosomal protein L5                                       | JZ6_10 | TZ19_10 | OK | 2101.88 | 8553.5  | 0        | 0        | yes |
| nptA protein                                               | JZ6_10 | TZ19_10 | OK | 338.563 | 1373.86 | 0        | 0        | yes |
| Soluble lytic murein transglycosylase precursor            | JZ6_10 | TZ19_10 | OK | 54.1842 | 218.864 | 0        | 0        | yes |
| Transcriptional regulator                                  | JZ6_10 | TZ19_10 | OK | 755.299 | 3046.51 | 0        | 0        | yes |
| putative peptidase T                                       | JZ6_10 | TZ19_10 | OK | 118.318 | 477.197 | 0        | 0        | yes |
| Translation initiation inhibitor, yjgF family              | JZ6_10 | TZ19_10 | OK | 160.919 | 645.974 | 1.19E-09 | 4.10E-09 | yes |
| putative multidrug resistance efflux pump                  | JZ6_10 | TZ19_10 | OK | 27.872  | 111.13  | 4.31E-10 | 1.54E-09 | yes |
| putative sulfurtransferase                                 | JZ6_10 | TZ19_10 | OK | 22.4515 | 89.3618 | 9.06E-07 | 2.47E-06 | yes |
| Glutamate synthase                                         | JZ6_10 | TZ19_10 | OK | 20.3558 | 80.7837 | 0        | 0        | yes |

|                                                            |        |         |    |         |         |          |          |     |
|------------------------------------------------------------|--------|---------|----|---------|---------|----------|----------|-----|
| Transcriptional regulator, MarR family                     | JZ6_10 | TZ19_10 | OK | 138.27  | 544.533 | 3.38E-13 | 1.47E-12 | yes |
| hypothetical protein                                       | JZ6_10 | TZ19_10 | OK | 72.8522 | 286.045 | 8.88E-16 | 4.47E-15 | yes |
| putative Penicillin-binding protein                        | JZ6_10 | TZ19_10 | OK | 223.309 | 875.542 | 0        | 0        | yes |
| putative Co-chaperonin GroES                               | JZ6_10 | TZ19_10 | OK | 208.262 | 813.285 | 1.95E-07 | 5.65E-07 | yes |
| ribosomal protein S6                                       | JZ6_10 | TZ19_10 | OK | 853.794 | 3272.78 | 0        | 0        | yes |
| Ribosomal protein S6 modification protein                  | JZ6_10 | TZ19_10 | OK | 2779.66 | 10576.8 | 0        | 0        | yes |
| Bifunctional protein argH                                  | JZ6_10 | TZ19_10 | OK | 91.2848 | 344.873 | 0        | 0        | yes |
| Dihydroxy-acid dehydratase                                 | JZ6_10 | TZ19_10 | OK | 34.0708 | 128.248 | 0        | 0        | yes |
| Ca <sup>2+</sup> /Na <sup>+</sup> antiporter               | JZ6_10 | TZ19_10 | OK | 28.7265 | 107.606 | 6.93E-08 | 2.09E-07 | yes |
| Glycerol-3-phosphate dehydrogenase                         | JZ6_10 | TZ19_10 | OK | 83.1794 | 311.221 | 0        | 0        | yes |
| cytochrome c oxidase, subunit CcoO                         | JZ6_10 | TZ19_10 | OK | 126.44  | 472.649 | 4.44E-16 | 2.26E-15 | yes |
| Phosphoserine aminotransferase                             | JZ6_10 | TZ19_10 | OK | 80.7651 | 301.269 | 0        | 0        | yes |
| Acyl carrier protein                                       | JZ6_10 | TZ19_10 | OK | 540.336 | 2010.33 | 9.57E-12 | 3.84E-11 | yes |
| ABC transporter, ATP-binding protein                       | JZ6_10 | TZ19_10 | OK | 114.242 | 423.391 | 0        | 0        | yes |
| Exodeoxyribonuclease V beta chain                          | JZ6_10 | TZ19_10 | OK | 15.8344 | 58.5626 | 0        | 0        | yes |
| Heat shock protein                                         | JZ6_10 | TZ19_10 | OK | 1946.43 | 7196.8  | 0        | 0        | yes |
| Aminopeptidase N                                           | JZ6_10 | TZ19_10 | OK | 91.2741 | 336.875 | 0        | 0        | yes |
| sensor histidine kinase                                    | JZ6_10 | TZ19_10 | OK | 58.7188 | 216.672 | 0        | 0        | yes |
| Arylsulfatase A                                            | JZ6_10 | TZ19_10 | OK | 32.4753 | 119.037 | 4.11E-14 | 1.89E-13 | yes |
| transcription-repair coupling factor                       | JZ6_10 | TZ19_10 | OK | 50.6188 | 184.773 | 0        | 0        | yes |
| HTH-type protein slmA                                      | JZ6_10 | TZ19_10 | OK | 50.5596 | 183.29  | 6.36E-07 | 1.76E-06 | yes |
| DnaK-related protein                                       | JZ6_10 | TZ19_10 | OK | 33.6419 | 121.673 | 0        | 0        | yes |
| RNA methyltransferase, TrmH family                         | JZ6_10 | TZ19_10 | OK | 38.3753 | 138.521 | 2.10E-07 | 6.06E-07 | yes |
| Serine--pyruvate aminotransferase                          | JZ6_10 | TZ19_10 | OK | 19.5675 | 70.5475 | 1.55E-06 | 4.13E-06 | yes |
| 50S ribosomal protein L24                                  | JZ6_10 | TZ19_10 | OK | 7041.9  | 25239   | 0        | 0        | yes |
| DNA-binding protein HU-alpha                               | JZ6_10 | TZ19_10 | OK | 7774.67 | 27782.4 | 0        | 0        | yes |
| 3-phosphoglycerate kinase part 2                           | JZ6_10 | TZ19_10 | OK | 835.34  | 2984.93 | 0        | 0        | yes |
| Cold shock-like protein cspD                               | JZ6_10 | TZ19_10 | OK | 6708.52 | 23772.1 | 0        | 0        | yes |
| Acetylornithine aminotransferase                           | JZ6_10 | TZ19_10 | OK | 339.545 | 1198.68 | 0        | 0        | yes |
| Adenosine deaminase                                        | JZ6_10 | TZ19_10 | OK | 285.002 | 1004.16 | 0        | 0        | yes |
| Polar flagellar protein FlaK                               | JZ6_10 | TZ19_10 | OK | 47.9994 | 168.763 | 0        | 0        | yes |
| Phospho-2-dehydro-3-deoxyheptonate aldolase, Trp-sensitive | JZ6_10 | TZ19_10 | OK | 244.193 | 857.076 | 0        | 0        | yes |

|                                                                                    |        |         |    |         |         |          |          |     |
|------------------------------------------------------------------------------------|--------|---------|----|---------|---------|----------|----------|-----|
| Phosphoribosylaminoimidazole carboxylase ATPase subunit                            | JZ6_10 | TZ19_10 | OK | 48.3067 | 169.177 | 2.22E-13 | 9.78E-13 | yes |
| Ribosomal large subunit pseudouridine synthase C                                   | JZ6_10 | TZ19_10 | OK | 465.615 | 1621.94 | 0        | 0        | yes |
| Periplasmic oligopeptide-binding protein                                           | JZ6_10 | TZ19_10 | OK | 561.051 | 1950.92 | 0        | 0        | yes |
| Hypothetical protein                                                               | JZ6_10 | TZ19_10 | OK | 85.4788 | 296.82  | 0        | 0        | yes |
| Single-strand binding protein (SSB) (Helix-destabilizing protein)                  | JZ6_10 | TZ19_10 | OK | 272.409 | 943.963 | 0        | 0        | yes |
| Hypothetical UPF0265 protein                                                       | JZ6_10 | TZ19_10 | OK | 2727.53 | 9445.38 | 0        | 0        | yes |
| hypothetical protein                                                               | JZ6_10 | TZ19_10 | OK | 35.4184 | 122.344 | 5.13E-10 | 1.82E-09 | yes |
| ADP-L-glycero-D-manno-heptose-6-epimerase                                          | JZ6_10 | TZ19_10 | OK | 68.0981 | 234.46  | 1.75E-14 | 8.24E-14 | yes |
| Acetyl-coenzyme A carboxylase carboxyl transferase subunit beta                    | JZ6_10 | TZ19_10 | OK | 534.04  | 1830.03 | 0        | 0        | yes |
| type II secretory pathway, pseudopilin EpsG                                        | JZ6_10 | TZ19_10 | OK | 192.222 | 657.554 | 5.50E-13 | 2.37E-12 | yes |
| 2,3-bisphosphoglycerate-independent phosphoglycerate mutase                        | JZ6_10 | TZ19_10 | OK | 301.66  | 1031.88 | 0        | 0        | yes |
| GTP-binding protein HflX                                                           | JZ6_10 | TZ19_10 | OK | 492.642 | 1676.23 | 0        | 0        | yes |
| Smf protein                                                                        | JZ6_10 | TZ19_10 | OK | 89.1378 | 302.794 | 0        | 0        | yes |
| cAMP-binding proteins                                                              | JZ6_10 | TZ19_10 | OK | 4191.1  | 14191.6 | 0        | 0        | yes |
| PTS system N-acetylglucosamine-specific EIICBA component                           | JZ6_10 | TZ19_10 | OK | 471.365 | 1589.61 | 0        | 0        | yes |
| Predicted ATP-dependent serine protease                                            | JZ6_10 | TZ19_10 | OK | 34.6526 | 116.682 | 1.19E-11 | 4.75E-11 | yes |
| cell division protein FtsH                                                         | JZ6_10 | TZ19_10 | OK | 854.877 | 2871.92 | 0        | 0        | yes |
| ATP-dependent Clp protease proteolytic subunit                                     | JZ6_10 | TZ19_10 | OK | 1689.29 | 5662.97 | 0        | 0        | yes |
| putative cell division protein FtsN                                                | JZ6_10 | TZ19_10 | OK | 151.027 | 505.782 | 4.66E-15 | 2.26E-14 | yes |
| ribosomal protein L6                                                               | JZ6_10 | TZ19_10 | OK | 1121.27 | 3727.05 | 0        | 0        | yes |
| Histidine transport system permease protein hisQ                                   | JZ6_10 | TZ19_10 | OK | 45.1648 | 149.558 | 5.13E-07 | 1.43E-06 | yes |
| Homoserine kinase                                                                  | JZ6_10 | TZ19_10 | OK | 25.9212 | 85.2799 | 3.59E-06 | 9.19E-06 | yes |
| putative transmembrane transport protein                                           | JZ6_10 | TZ19_10 | OK | 57.4769 | 188.994 | 4.81E-12 | 1.96E-11 | yes |
| Conserved hypothetical protein                                                     | JZ6_10 | TZ19_10 | OK | 436.647 | 1435.44 | 0        | 0        | yes |
| hypothetical protein                                                               | JZ6_10 | TZ19_10 | OK | 204.067 | 670.624 | 2.52E-06 | 6.55E-06 | yes |
| ABC transporter: Substrate-binding protein precursor; Maltooligosaccharides uptake | JZ6_10 | TZ19_10 | OK | 266.587 | 875.552 | 0        | 0        | yes |
| SlyX protein                                                                       | JZ6_10 | TZ19_10 | OK | 546.634 | 1794.93 | 6.88E-08 | 2.08E-07 | yes |
| Protease II (Oligopeptidase B)                                                     | JZ6_10 | TZ19_10 | OK | 11.2001 | 36.5564 | 1.51E-06 | 4.04E-06 | yes |
| Biosynthetic arginine decarboxylase                                                | JZ6_10 | TZ19_10 | OK | 543.431 | 1773.48 | 0        | 0        | yes |
| ABC transporter: substrate-binding protein precursor                               | JZ6_10 | TZ19_10 | OK | 29.6102 | 96.5324 | 5.65E-11 | 2.15E-10 | yes |
| glyoxylase II family protein                                                       | JZ6_10 | TZ19_10 | OK | 192.245 | 624.692 | 0        | 0        | yes |
| Formate acetyltransferase                                                          | JZ6_10 | TZ19_10 | OK | 2223.8  | 7219.26 | 0        | 0        | yes |

|                                                                   |        |         |    |         |         |          |          |     |
|-------------------------------------------------------------------|--------|---------|----|---------|---------|----------|----------|-----|
| hypothetical protein                                              | JZ6_10 | TZ19_10 | OK | 1849.13 | 6002.05 | 0        | 0        | yes |
| Hypothetical lipoprotein                                          | JZ6_10 | TZ19_10 | OK | 70.9117 | 229.737 | 9.41E-10 | 3.27E-09 | yes |
| ABC-type Fe <sup>3+</sup> transport system, periplasmic component | JZ6_10 | TZ19_10 | OK | 814.177 | 2627.74 | 0        | 0        | yes |
| Guanosine-3'-bis(diphosphate) 3'-pyrophosphohydrolase             | JZ6_10 | TZ19_10 | OK | 57.9591 | 186.75  | 0        | 0        | yes |
| Transketolase 1                                                   | JZ6_10 | TZ19_10 | OK | 221.257 | 711.334 | 0        | 0        | yes |
| NadC                                                              | JZ6_10 | TZ19_10 | OK | 86.9728 | 278.768 | 4.00E-15 | 1.95E-14 | yes |
| putative N-acetyl-D-glucosamine kinase                            | JZ6_10 | TZ19_10 | OK | 63.3982 | 202.078 | 4.57E-11 | 1.75E-10 | yes |
| Hypothetical protein                                              | JZ6_10 | TZ19_10 | OK | 22.5945 | 71.9495 | 3.94E-08 | 1.21E-07 | yes |
| hypothetical protein                                              | JZ6_10 | TZ19_10 | OK | 1798.01 | 5711.02 | 0        | 0        | yes |
| Asparagine synthetase B, glutamine-hydrolyzing                    | JZ6_10 | TZ19_10 | OK | 73.9122 | 232.823 | 0        | 0        | yes |
| Prolyl 4-hydroxylase alpha subunit homologue                      | JZ6_10 | TZ19_10 | OK | 218.039 | 686.593 | 0        | 0        | yes |
| hypothetical protein                                              | JZ6_10 | TZ19_10 | OK | 509.48  | 1601.74 | 4.44E-16 | 2.26E-15 | yes |
| Leucyl-tRNA synthetase                                            | JZ6_10 | TZ19_10 | OK | 81.749  | 257.005 | 0        | 0        | yes |
| Deoxyribodipyrimidine photolyase-related protein                  | JZ6_10 | TZ19_10 | OK | 25.8165 | 81.1472 | 3.77E-09 | 1.26E-08 | yes |
| Transcription activator ToxR                                      | JZ6_10 | TZ19_10 | OK | 31.4852 | 98.9258 | 3.91E-06 | 9.94E-06 | yes |
| Phosphoenolpyruvate carboxykinase                                 | JZ6_10 | TZ19_10 | OK | 2390.69 | 7506.93 | 0        | 0        | yes |
| Antioxidant, AhpC/Tsa family                                      | JZ6_10 | TZ19_10 | OK | 5258    | 16474.6 | 0        | 0        | yes |
| Phenylalanyl-tRNA synthetase beta chain                           | JZ6_10 | TZ19_10 | OK | 67.2875 | 210.633 | 0        | 0        | yes |
| putative excinuclease ABC subunit C                               | JZ6_10 | TZ19_10 | OK | 38.7805 | 121.378 | 3.69E-08 | 1.14E-07 | yes |
| Ribosomal protein L30                                             | JZ6_10 | TZ19_10 | OK | 2957.12 | 9247.93 | 0        | 0        | yes |
| 50S ribosomal protein L21                                         | JZ6_10 | TZ19_10 | OK | 10434.2 | 32588.9 | 0        | 0        | yes |
| Transcriptional regulator                                         | JZ6_10 | TZ19_10 | OK | 88.7006 | 277.028 | 7.99E-15 | 3.82E-14 | yes |
| Orotate phosphoribosyltransferase                                 | JZ6_10 | TZ19_10 | OK | 63.8318 | 199.25  | 2.71E-07 | 7.74E-07 | yes |
| Carbamoyl-phosphate synthase, small subunit                       | JZ6_10 | TZ19_10 | OK | 63.5744 | 198.137 | 7.19E-14 | 3.25E-13 | yes |
| SspA                                                              | JZ6_10 | TZ19_10 | OK | 1254.6  | 3898.47 | 0        | 0        | yes |
| ATP-dependent RNA helicase, DEAD box family                       | JZ6_10 | TZ19_10 | OK | 115.125 | 355.181 | 0        | 0        | yes |
| Orotidine 5'-phosphate decarboxylase                              | JZ6_10 | TZ19_10 | OK | 145.361 | 448.042 | 2.89E-15 | 1.41E-14 | yes |
| 50S ribosomal subunit protein L36                                 | JZ6_10 | TZ19_10 | OK | 44760.5 | 137590  | 0        | 0        | yes |
| Adenylate cyclase                                                 | JZ6_10 | TZ19_10 | OK | 126.685 | 389.374 | 0        | 0        | yes |
| Glutaredoxin                                                      | JZ6_10 | TZ19_10 | OK | 2531.97 | 7751.07 | 0        | 0        | yes |
| Hypothetical M22 peptidase homolog yeaZ                           | JZ6_10 | TZ19_10 | OK | 81.4083 | 248.922 | 6.91E-10 | 2.43E-09 | yes |
| Conserved hypothetical protein                                    | JZ6_10 | TZ19_10 | OK | 613.802 | 1867.47 | 0        | 0        | yes |

|                                                                           |        |         |    |         |          |          |          |     |
|---------------------------------------------------------------------------|--------|---------|----|---------|----------|----------|----------|-----|
| Cell division protein ftsZ                                                | JZ6_10 | TZ19_10 | OK | 935.508 | 2843.44  | 0        | 0        | yes |
| Pyruvate dehydrogenase E1 component                                       | JZ6_10 | TZ19_10 | OK | 142.377 | 432.713  | 0        | 0        | yes |
| putative aromatic ring-cleaving dioxygenase                               | JZ6_10 | TZ19_10 | OK | 208.215 | 632.685  | 1.33E-06 | 3.57E-06 | yes |
| Homoserine dehydrogenase                                                  | JZ6_10 | TZ19_10 | OK | 66.5993 | 202.329  | 0        | 0        | yes |
| Methylase of chemotaxis methyl-accepting protein CheR                     | JZ6_10 | TZ19_10 | OK | 124.932 | 378.828  | 2.22E-16 | 1.15E-15 | yes |
| Alanyl-tRNA synthetase                                                    | JZ6_10 | TZ19_10 | OK | 95.6207 | 289.913  | 0        | 0        | yes |
| hypothetical protein                                                      | JZ6_10 | TZ19_10 | OK | 220.479 | 666.354  | 1.36E-06 | 3.65E-06 | yes |
| hypothetical protein                                                      | JZ6_10 | TZ19_10 | OK | 788.638 | 2382.51  | 0        | 0        | yes |
| UDP-N-acetylmuramate:L-alanyl-gamma-D-glutamyl-meso-diaminopimelateligase | JZ6_10 | TZ19_10 | OK | 57.8923 | 174.447  | 6.42E-14 | 2.91E-13 | yes |
| Cytochrome c553                                                           | JZ6_10 | TZ19_10 | OK | 444.195 | 1336.67  | 8.49E-11 | 3.19E-10 | yes |
| Ribonuclease T (RNase T)                                                  | JZ6_10 | TZ19_10 | OK | 166.946 | 502.291  | 0        | 0        | yes |
| DNA transformation protein                                                | JZ6_10 | TZ19_10 | OK | 667.569 | 2006.53  | 0        | 0        | yes |
| hypothetical protein                                                      | JZ6_10 | TZ19_10 | OK | 301.489 | 905.626  | 0        | 0        | yes |
| Autonomous glycyl radical cofactor                                        | JZ6_10 | TZ19_10 | OK | 6155.46 | 18447.8  | 0        | 0        | yes |
| ATP-dependent RNA helicase                                                | JZ6_10 | TZ19_10 | OK | 635.787 | 1900.05  | 0        | 0        | yes |
| Flavodoxin                                                                | JZ6_10 | TZ19_10 | OK | 2461.58 | 7344.73  | 0        | 0        | yes |
| putative protease                                                         | JZ6_10 | TZ19_10 | OK | 130.429 | 389.061  | 0        | 0        | yes |
| Malate synthase domain protein                                            | JZ6_10 | TZ19_10 | OK | 514.648 | 1533.58  | 0        | 0        | yes |
| Conserved hypothetical protein                                            | JZ6_10 | TZ19_10 | OK | 1365.87 | 4067.62  | 0        | 0        | yes |
| Glutaminase                                                               | JZ6_10 | TZ19_10 | OK | 66.3445 | 196.424  | 1.50E-10 | 5.57E-10 | yes |
| Cytochrome c-type biogenesis protein ccmE                                 | JZ6_10 | TZ19_10 | OK | 131.743 | 389.775  | 2.65E-08 | 8.29E-08 | yes |
| DNA-directed RNA polymerase omega chain                                   | JZ6_10 | TZ19_10 | OK | 3902.91 | 11462.6  | 0        | 0        | yes |
| Malate synthase                                                           | JZ6_10 | TZ19_10 | OK | 106.776 | 313.307  | 2.30E-09 | 7.76E-09 | yes |
| hypothetical protein                                                      | JZ6_10 | TZ19_10 | OK | 345.764 | 1011.38  | 0        | 0        | yes |
| Superoxide dismutase                                                      | JZ6_10 | TZ19_10 | OK | 2248.75 | 6548.19  | 0        | 0        | yes |
| hypothetical protein                                                      | JZ6_10 | TZ19_10 | OK | 364.479 | 1055.86  | 0        | 0        | yes |
| NifU-related domain containing protein                                    | JZ6_10 | TZ19_10 | OK | 75.4602 | 217.945  | 3.67E-09 | 1.22E-08 | yes |
| Outer membrane protein                                                    | JZ6_10 | TZ19_10 | OK | 34.6048 | 99.5152  | 7.35E-10 | 2.58E-09 | yes |
| outer membrane protein TolC                                               | JZ6_10 | TZ19_10 | OK | 673.014 | 1928.39  | 0        | 0        | yes |
| hypothetical protein                                                      | JZ6_10 | TZ19_10 | OK | 737890  | 2.10E+06 | 0        | 0        | yes |
| Seryl-tRNA synthetase                                                     | JZ6_10 | TZ19_10 | OK | 939.949 | 2679.8   | 0        | 0        | yes |
| Chaperone protein dnaK                                                    | JZ6_10 | TZ19_10 | OK | 733.564 | 2089.47  | 0        | 0        | yes |

|                                                          |        |         |    |         |         |          |          |     |
|----------------------------------------------------------|--------|---------|----|---------|---------|----------|----------|-----|
| Naphthoate synthase                                      | JZ6_10 | TZ19_10 | OK | 487.458 | 1387.35 | 0        | 0        | yes |
| Aspartyl-tRNA synthetase                                 | JZ6_10 | TZ19_10 | OK | 268.738 | 764.249 | 0        | 0        | yes |
| Fold bifunctional protein                                | JZ6_10 | TZ19_10 | OK | 117.164 | 332.298 | 2.66E-14 | 1.24E-13 | yes |
| ATP-dependent RNA helicase RhlB                          | JZ6_10 | TZ19_10 | OK | 219.454 | 620.968 | 0        | 0        | yes |
| ribosomal protein S4                                     | JZ6_10 | TZ19_10 | OK | 1831.56 | 5161.18 | 0        | 0        | yes |
| hypothetical protein                                     | JZ6_10 | TZ19_10 | OK | 344.996 | 970.642 | 3.64E-13 | 1.58E-12 | yes |
| Peptidase                                                | JZ6_10 | TZ19_10 | OK | 154.888 | 435.643 | 0        | 0        | yes |
| 50S ribosomal protein L35                                | JZ6_10 | TZ19_10 | OK | 22011.9 | 61881.4 | 0        | 0        | yes |
| UTP--glucose-1-phosphate uridylyltransferase             | JZ6_10 | TZ19_10 | OK | 225.633 | 632.474 | 0        | 0        | yes |
| Cytochrome d ubiquinol oxidase subunit I                 | JZ6_10 | TZ19_10 | OK | 352.972 | 989.337 | 0        | 0        | yes |
| ATP synthase subunit I                                   | JZ6_10 | TZ19_10 | OK | 3244.23 | 9090.4  | 0        | 0        | yes |
| transcription elongation factor GreA                     | JZ6_10 | TZ19_10 | OK | 907.605 | 2540.19 | 0        | 0        | yes |
| Transcriptional regulator                                | JZ6_10 | TZ19_10 | OK | 120.009 | 335.234 | 1.91E-06 | 5.05E-06 | yes |
| hypothetical protein                                     | JZ6_10 | TZ19_10 | OK | 910.527 | 2543.24 | 4.14E-13 | 1.79E-12 | yes |
| Glutamyl-tRNA synthetase                                 | JZ6_10 | TZ19_10 | OK | 638.552 | 1782.52 | 0        | 0        | yes |
| putative protein involved in catabolism of external DNA  | JZ6_10 | TZ19_10 | OK | 47.6905 | 132.482 | 1.70E-06 | 4.51E-06 | yes |
| putative carbamate kinase                                | JZ6_10 | TZ19_10 | OK | 1074.56 | 2982.43 | 0        | 0        | yes |
| Permease family protein                                  | JZ6_10 | TZ19_10 | OK | 67.922  | 188.091 | 4.86E-14 | 2.22E-13 | yes |
| Carbon storage regulator homolog                         | JZ6_10 | TZ19_10 | OK | 11702   | 32370.8 | 0        | 0        | yes |
| DNA polymerase I                                         | JZ6_10 | TZ19_10 | OK | 28.8312 | 79.6982 | 1.74E-13 | 7.68E-13 | yes |
| hypothetical protein                                     | JZ6_10 | TZ19_10 | OK | 177.567 | 490.202 | 6.66E-14 | 3.02E-13 | yes |
| Chaperone protein htpG                                   | JZ6_10 | TZ19_10 | OK | 79.6572 | 219.784 | 0        | 0        | yes |
| phosphoenolpyruvate carboxylase                          | JZ6_10 | TZ19_10 | OK | 26.8689 | 73.8753 | 3.62E-12 | 1.49E-11 | yes |
| Na <sup>+</sup> /H <sup>+</sup> -dicarboxylate symporter | JZ6_10 | TZ19_10 | OK | 50.8306 | 139.205 | 2.01E-10 | 7.39E-10 | yes |
| Ribonuclease PH                                          | JZ6_10 | TZ19_10 | OK | 798.064 | 2184.6  | 0        | 0        | yes |
| Transcription elongation factor greB                     | JZ6_10 | TZ19_10 | OK | 258.989 | 708.011 | 5.11E-13 | 2.20E-12 | yes |
| ubiquinol-cytochrome c reductase,cytochrome c1           | JZ6_10 | TZ19_10 | OK | 90.2499 | 246.244 | 6.55E-09 | 2.15E-08 | yes |
| 2-oxoglutarate dehydrogenase E1 component                | JZ6_10 | TZ19_10 | OK | 154.675 | 421.557 | 0        | 0        | yes |
| Transcription elongation protein nusA                    | JZ6_10 | TZ19_10 | OK | 380.839 | 1032.59 | 0        | 0        | yes |
| Nucleoside diphosphate kinase                            | JZ6_10 | TZ19_10 | OK | 447.28  | 1211.14 | 0        | 0        | yes |
| GMP reductase                                            | JZ6_10 | TZ19_10 | OK | 370.694 | 1003.07 | 0        | 0        | yes |
| putative zinc uptake regulation protein                  | JZ6_10 | TZ19_10 | OK | 818.555 | 2213.11 | 0        | 0        | yes |

|                                                                |        |         |    |         |         |          |          |     |
|----------------------------------------------------------------|--------|---------|----|---------|---------|----------|----------|-----|
| flagellar motor protein                                        | JZ6_10 | TZ19_10 | OK | 69.3232 | 186.987 | 1.98E-07 | 5.74E-07 | yes |
| iron-sulfur cluster-binding protein NapF                       | JZ6_10 | TZ19_10 | OK | 144.337 | 389.01  | 6.96E-08 | 2.10E-07 | yes |
| putative general secretion pathway protein A                   | JZ6_10 | TZ19_10 | OK | 20.9963 | 56.4464 | 2.52E-06 | 6.56E-06 | yes |
| ribosomal protein L34                                          | JZ6_10 | TZ19_10 | OK | 28074.3 | 75421.5 | 0        | 0        | yes |
| HTH-type transcriptional regulator luxR                        | JZ6_10 | TZ19_10 | OK | 860.788 | 2312.14 | 0        | 0        | yes |
| ribosomal protein L1                                           | JZ6_10 | TZ19_10 | OK | 661.886 | 1776.59 | 0        | 0        | yes |
| Flavodoxin-2                                                   | JZ6_10 | TZ19_10 | OK | 267.031 | 716.303 | 3.22E-14 | 1.49E-13 | yes |
| Hypothetical tRNA/rRNA methyltransferase                       | JZ6_10 | TZ19_10 | OK | 150.326 | 399.389 | 1.41E-07 | 4.13E-07 | yes |
| Tryptophan synthase beta chain                                 | JZ6_10 | TZ19_10 | OK | 49.8532 | 131.968 | 1.36E-08 | 4.36E-08 | yes |
| Carbamoyl-phosphate synthase large chain                       | JZ6_10 | TZ19_10 | OK | 43.1336 | 113.868 | 0        | 0        | yes |
| Hypothetical protein                                           | JZ6_10 | TZ19_10 | OK | 612.947 | 1609.65 | 2.43E-06 | 6.33E-06 | yes |
| hypothetical protein                                           | JZ6_10 | TZ19_10 | OK | 4350.51 | 11410.8 | 1.32E-07 | 3.86E-07 | yes |
| Conserved hypothetical protein                                 | JZ6_10 | TZ19_10 | OK | 482.265 | 1263.9  | 3.06E-06 | 7.89E-06 | yes |
| Hypoxanthine phosphoribosyltransferase                         | JZ6_10 | TZ19_10 | OK | 923.938 | 2419.81 | 0        | 0        | yes |
| Hypothetical protein                                           | JZ6_10 | TZ19_10 | OK | 195.27  | 511.216 | 2.22E-16 | 1.15E-15 | yes |
| 3-methyl-2-oxobutanoate hydroxymethyltransferase               | JZ6_10 | TZ19_10 | OK | 87.1892 | 227.742 | 6.41E-09 | 2.10E-08 | yes |
| Tyrosine recombinase xerD                                      | JZ6_10 | TZ19_10 | OK | 93.5508 | 244.033 | 2.03E-11 | 7.95E-11 | yes |
| Protein smtA                                                   | JZ6_10 | TZ19_10 | OK | 104.353 | 270.363 | 5.13E-10 | 1.82E-09 | yes |
| Transcriptional regulatory protein ompR                        | JZ6_10 | TZ19_10 | OK | 824.039 | 2127.09 | 0        | 0        | yes |
| Hypothetical protein                                           | JZ6_10 | TZ19_10 | OK | 356.762 | 914.787 | 0        | 0        | yes |
| Oxaloacetate decarboxylase alpha chain                         | JZ6_10 | TZ19_10 | OK | 124.86  | 320.103 | 0        | 0        | yes |
| Flagellin core protein A                                       | JZ6_10 | TZ19_10 | OK | 36.8291 | 94.1571 | 1.55E-06 | 4.13E-06 | yes |
| Protein smg homolog                                            | JZ6_10 | TZ19_10 | OK | 600.938 | 1534.42 | 0        | 0        | yes |
| DNA-directed RNA polymerase, alpha subunit                     | JZ6_10 | TZ19_10 | OK | 2589.59 | 6610.92 | 0        | 0        | yes |
| Isoleucyl-tRNA synthetase                                      | JZ6_10 | TZ19_10 | OK | 140.827 | 358.247 | 0        | 0        | yes |
| Adenylosuccinate synthetase                                    | JZ6_10 | TZ19_10 | OK | 1106.16 | 2812.82 | 0        | 0        | yes |
| hypothetical protein                                           | JZ6_10 | TZ19_10 | OK | 216.714 | 549.215 | 1.45E-11 | 5.75E-11 | yes |
| 2,3,4,5-tetrahydropyridine-2-carboxylate N-succinyltransferase | JZ6_10 | TZ19_10 | OK | 180.797 | 457.22  | 0        | 0        | yes |
| Hypothetical protein                                           | JZ6_10 | TZ19_10 | OK | 51.3773 | 129.784 | 4.44E-16 | 2.26E-15 | yes |
| Hypothetical protein                                           | JZ6_10 | TZ19_10 | OK | 172.207 | 434.487 | 3.11E-15 | 1.52E-14 | yes |
| 50S ribosomal protein L32                                      | JZ6_10 | TZ19_10 | OK | 18275.8 | 46051.1 | 0        | 0        | yes |
| methionyl-tRNA synthetase                                      | JZ6_10 | TZ19_10 | OK | 181.056 | 455.459 | 0        | 0        | yes |



|                                                                                  |        |         |    |         |         |          |          |     |
|----------------------------------------------------------------------------------|--------|---------|----|---------|---------|----------|----------|-----|
| Glycerol-3-phosphate dehydrogenase (NAD <sup>+</sup> )                           | JZ6_10 | TZ19_10 | OK | 64.081  | 161.198 | 3.56E-09 | 1.19E-08 | yes |
| polar flagellin                                                                  | JZ6_10 | TZ19_10 | OK | 34.4578 | 86.6043 | 3.89E-06 | 9.90E-06 | yes |
| ribosomal protein S13                                                            | JZ6_10 | TZ19_10 | OK | 3203.52 | 8003.01 | 0        | 0        | yes |
| L-aspartate oxidase                                                              | JZ6_10 | TZ19_10 | OK | 228.172 | 569.848 | 0        | 0        | yes |
| ribosomal subunit interface protein                                              | JZ6_10 | TZ19_10 | OK | 13015.2 | 32471.2 | 0        | 0        | yes |
| hypothetical protein                                                             | JZ6_10 | TZ19_10 | OK | 3246.41 | 8070.43 | 0        | 0        | yes |
| hypothetical protein                                                             | JZ6_10 | TZ19_10 | OK | 542.865 | 1346.62 | 0        | 0        | yes |
| Polar flagellin B                                                                | JZ6_10 | TZ19_10 | OK | 123.178 | 305.356 | 0        | 0        | yes |
| Aspartate carbamoyltransferase                                                   | JZ6_10 | TZ19_10 | OK | 230.479 | 570.433 | 0        | 0        | yes |
| Trigger factor                                                                   | JZ6_10 | TZ19_10 | OK | 535.73  | 1324.33 | 0        | 0        | yes |
| Phosphoenolpyruvate-protein phosphotransferase                                   | JZ6_10 | TZ19_10 | OK | 770.707 | 1902.97 | 0        | 0        | yes |
| Peptidyl-prolyl cis-trans isomerase B                                            | JZ6_10 | TZ19_10 | OK | 2058.96 | 5078.9  | 0        | 0        | yes |
| ribosomal protein S8                                                             | JZ6_10 | TZ19_10 | OK | 1280.67 | 3158.9  | 0        | 0        | yes |
| N-acetylglucosamine repressor                                                    | JZ6_10 | TZ19_10 | OK | 286.721 | 706.279 | 0        | 0        | yes |
| hypothetical protein                                                             | JZ6_10 | TZ19_10 | OK | 758.215 | 1867.56 | 0        | 0        | yes |
| A/G-specific adenine glycosylase                                                 | JZ6_10 | TZ19_10 | OK | 57.0357 | 140.339 | 7.37E-08 | 2.22E-07 | yes |
| Transketolase                                                                    | JZ6_10 | TZ19_10 | OK | 193.734 | 475.994 | 0        | 0        | yes |
| Hypothetical adenine-specific methylase                                          | JZ6_10 | TZ19_10 | OK | 306.372 | 752.671 | 0        | 0        | yes |
| hypothetical protein                                                             | JZ6_10 | TZ19_10 | OK | 5533.14 | 13573.9 | 0        | 0        | yes |
| Queuine tRNA-ribosyltransferase                                                  | JZ6_10 | TZ19_10 | OK | 167.539 | 410.383 | 0        | 0        | yes |
| Dipeptide/tripeptide permease                                                    | JZ6_10 | TZ19_10 | OK | 339.445 | 829.112 | 0        | 0        | yes |
| Hypothetical protein                                                             | JZ6_10 | TZ19_10 | OK | 85.2496 | 207.804 | 5.25E-07 | 1.46E-06 | yes |
| Guanylate kinase                                                                 | JZ6_10 | TZ19_10 | OK | 253.74  | 618.35  | 8.44E-14 | 3.80E-13 | yes |
| Hemolysin III                                                                    | JZ6_10 | TZ19_10 | OK | 337.17  | 820.455 | 0        | 0        | yes |
| Hypothetical acetyltransferase                                                   | JZ6_10 | TZ19_10 | OK | 237.883 | 578.743 | 1.40E-09 | 4.81E-09 | yes |
| Conserved hypothetical protein                                                   | JZ6_10 | TZ19_10 | OK | 12049.6 | 29315   | 0        | 0        | yes |
| Hypothetical protein                                                             | JZ6_10 | TZ19_10 | OK | 108.111 | 262.551 | 1.55E-09 | 5.33E-09 | yes |
| Na(+)-translocating NADH-quinone reductase subunit E                             | JZ6_10 | TZ19_10 | OK | 351.615 | 851.909 | 4.66E-15 | 2.26E-14 | yes |
| Aerobic respiration control protein arcA                                         | JZ6_10 | TZ19_10 | OK | 3253.91 | 7883.59 | 0        | 0        | yes |
| Multidrug resistance protein                                                     | JZ6_10 | TZ19_10 | OK | 114.307 | 276.679 | 4.44E-16 | 2.26E-15 | yes |
| Cytochrome c biogenesis protein ccmG (Thiol:disulfide interchange protein dsbE ) | JZ6_10 | TZ19_10 | OK | 165.286 | 399.981 | 1.27E-07 | 3.75E-07 | yes |
| Xanthine phosphoribosyltransferase                                               | JZ6_10 | TZ19_10 | OK | 546.71  | 1320.65 | 0        | 0        | yes |

|                                                             |        |         |    |         |         |          |          |     |
|-------------------------------------------------------------|--------|---------|----|---------|---------|----------|----------|-----|
| ABC transporter: ATP-binding protein                        | JZ6_10 | TZ19_10 | OK | 83.1419 | 200.585 | 2.22E-07 | 6.40E-07 | yes |
| Methyl-accepting chemotaxis protein                         | JZ6_10 | TZ19_10 | OK | 48.1509 | 116.16  | 2.15E-10 | 7.86E-10 | yes |
| ATP synthase C chain                                        | JZ6_10 | TZ19_10 | OK | 3114.26 | 7495.33 | 0        | 0        | yes |
| conserved hypothetical protein                              | JZ6_10 | TZ19_10 | OK | 987.829 | 2369.42 | 0        | 0        | yes |
| RctB protein                                                | JZ6_10 | TZ19_10 | OK | 68.0998 | 163.147 | 2.44E-15 | 1.20E-14 | yes |
| Succinyl-CoA synthetase alpha chain                         | JZ6_10 | TZ19_10 | OK | 407.019 | 973.903 | 0        | 0        | yes |
| ATP synthase alpha chain                                    | JZ6_10 | TZ19_10 | OK | 528.714 | 1260.26 | 0        | 0        | yes |
| DNA-binding response regulator PhoB                         | JZ6_10 | TZ19_10 | OK | 583.169 | 1385.98 | 0        | 0        | yes |
| S-adenosylmethionine synthetase                             | JZ6_10 | TZ19_10 | OK | 456.887 | 1082.93 | 0        | 0        | yes |
| ATP-dependent RNA helicase srmB                             | JZ6_10 | TZ19_10 | OK | 462.827 | 1094.22 | 0        | 0        | yes |
| anthranilate synthase alpha subunit                         | JZ6_10 | TZ19_10 | OK | 31.9754 | 75.5598 | 2.12E-06 | 5.56E-06 | yes |
| lipoprotein NlpI                                            | JZ6_10 | TZ19_10 | OK | 118.921 | 279.874 | 9.64E-11 | 3.61E-10 | yes |
| Bacteriocin production protein                              | JZ6_10 | TZ19_10 | OK | 197.072 | 463.639 | 1.05E-07 | 3.13E-07 | yes |
| putative endoribonuclease                                   | JZ6_10 | TZ19_10 | OK | 142.857 | 335.869 | 0        | 0        | yes |
| conserved hypothetical protein                              | JZ6_10 | TZ19_10 | OK | 231.31  | 543.213 | 0        | 0        | yes |
| UDP-3-O-acyl-N-acetylglucosamine deacetylase                | JZ6_10 | TZ19_10 | OK | 947.167 | 2220.34 | 0        | 0        | yes |
| 30S ribosomal protein S10                                   | JZ6_10 | TZ19_10 | OK | 5444.56 | 12747.9 | 0        | 0        | yes |
| 6,7-dimethyl-8-ribityllumazine synthase                     | JZ6_10 | TZ19_10 | OK | 1274.66 | 2979.22 | 0        | 0        | yes |
| Protein pmbA                                                | JZ6_10 | TZ19_10 | OK | 158.042 | 368.848 | 0        | 0        | yes |
| 50S ribosomal protein L3                                    | JZ6_10 | TZ19_10 | OK | 2241.22 | 5221.05 | 0        | 0        | yes |
| Aspartate aminotransferase                                  | JZ6_10 | TZ19_10 | OK | 215.007 | 500.75  | 0        | 0        | yes |
| Chromosome partition protein mukB                           | JZ6_10 | TZ19_10 | OK | 18.0082 | 41.8096 | 1.63E-09 | 5.56E-09 | yes |
| Ribose-phosphate pyrophosphokinase                          | JZ6_10 | TZ19_10 | OK | 992.43  | 2303.76 | 0        | 0        | yes |
| Ribosomal large subunit pseudouridine synthase F            | JZ6_10 | TZ19_10 | OK | 228.075 | 529.418 | 0        | 0        | yes |
| Na(+)-translocating NADH-quinone reductase subunit F        | JZ6_10 | TZ19_10 | OK | 222.75  | 515.445 | 0        | 0        | yes |
| ribosome-binding factor A                                   | JZ6_10 | TZ19_10 | OK | 212.196 | 490.681 | 2.75E-06 | 7.12E-06 | yes |
| Octaprenyl-diphosphate synthase                             | JZ6_10 | TZ19_10 | OK | 144.565 | 332.591 | 3.93E-14 | 1.81E-13 | yes |
| ribosomal large subunit pseudouridine synthase D            | JZ6_10 | TZ19_10 | OK | 404.358 | 928.454 | 0        | 0        | yes |
| Polar flagellar FlgM homolog                                | JZ6_10 | TZ19_10 | OK | 390.851 | 895.509 | 4.27E-10 | 1.52E-09 | yes |
| putative transcriptional regulator (BolA family)            | JZ6_10 | TZ19_10 | OK | 3226.93 | 7378.76 | 0        | 0        | yes |
| Phosphocarrier protein HPr                                  | JZ6_10 | TZ19_10 | OK | 7150.98 | 16293   | 0        | 0        | yes |
| Spermidine/putrescine-binding periplasmic protein precursor | JZ6_10 | TZ19_10 | OK | 81.5425 | 185.572 | 3.79E-08 | 1.17E-07 | yes |

|                                                                     |        |         |    |         |         |          |          |     |
|---------------------------------------------------------------------|--------|---------|----|---------|---------|----------|----------|-----|
| ABC transporter: Transmembrane protein; Maltooligosaccharide uptake | JZ6_10 | TZ19_10 | OK | 76.0564 | 172.954 | 1.29E-06 | 3.47E-06 | yes |
| tryptophanyl-tRNA synthetase                                        | JZ6_10 | TZ19_10 | OK | 437.679 | 994.8   | 0        | 0        | yes |
| Conserved hypothetical protein                                      | JZ6_10 | TZ19_10 | OK | 6079.47 | 13773.7 | 0        | 0        | yes |
| Methionine synthase                                                 | JZ6_10 | TZ19_10 | OK | 26.3652 | 59.7118 | 6.22E-10 | 2.19E-09 | yes |
| Acetate kinase                                                      | JZ6_10 | TZ19_10 | OK | 636.872 | 1433.68 | 0        | 0        | yes |
| Hypothetical protein ybbK                                           | JZ6_10 | TZ19_10 | OK | 78.1323 | 175.825 | 5.30E-07 | 1.47E-06 | yes |
| ribosomal protein L11 methyltransferase                             | JZ6_10 | TZ19_10 | OK | 187.785 | 421.319 | 8.33E-14 | 3.75E-13 | yes |
| Ribosomal protein S19                                               | JZ6_10 | TZ19_10 | OK | 1218.8  | 2730.4  | 1.51E-10 | 5.58E-10 | yes |
| putative esterase                                                   | JZ6_10 | TZ19_10 | OK | 73.552  | 164.393 | 1.13E-07 | 3.33E-07 | yes |
| oxaloacetate decarboxylase gamma chain                              | JZ6_10 | TZ19_10 | OK | 1141.23 | 2550.51 | 1.24E-14 | 5.88E-14 | yes |
| cystathionine gamma-synthase                                        | JZ6_10 | TZ19_10 | OK | 53.0213 | 118.478 | 1.32E-06 | 3.55E-06 | yes |
| Phosphoglucomutase                                                  | JZ6_10 | TZ19_10 | OK | 109.503 | 243.309 | 0        | 0        | yes |
| Ribonuclease III                                                    | JZ6_10 | TZ19_10 | OK | 348.397 | 770.723 | 2.22E-16 | 1.15E-15 | yes |
| Ribosomal protein L28                                               | JZ6_10 | TZ19_10 | OK | 17438.2 | 38480.6 | 0        | 0        | yes |
| Alanine dehydrogenase                                               | JZ6_10 | TZ19_10 | OK | 5806.39 | 12768.8 | 0        | 0        | yes |
| Superfamily II DNA and RNA helicase                                 | JZ6_10 | TZ19_10 | OK | 176.026 | 386.71  | 0        | 0        | yes |
| putative factor-for-inversion stimulation protein                   | JZ6_10 | TZ19_10 | OK | 1637.13 | 3592.03 | 0        | 0        | yes |
| Na(+)-translocating NADH-quinone reductase subunit D                | JZ6_10 | TZ19_10 | OK | 722.038 | 1582.95 | 0        | 0        | yes |
| thiol:disulfide interchange protein                                 | JZ6_10 | TZ19_10 | OK | 138.747 | 303.754 | 8.62E-09 | 2.80E-08 | yes |
| Ubiquinol-cytochrome c reductase,iron-sulfur subunit                | JZ6_10 | TZ19_10 | OK | 997.291 | 2178.86 | 0        | 0        | yes |
| DNA primase                                                         | JZ6_10 | TZ19_10 | OK | 271.239 | 592.001 | 0        | 0        | yes |
| Conserved hypothetical protein                                      | JZ6_10 | TZ19_10 | OK | 95.815  | 209.123 | 1.87E-09 | 6.36E-09 | yes |
| gonadoliberin III-related protein                                   | JZ6_10 | TZ19_10 | OK | 88.3174 | 192.45  | 2.95E-12 | 1.22E-11 | yes |
| Glutamate-1-semialdehyde aminotransferase                           | JZ6_10 | TZ19_10 | OK | 142.624 | 310.589 | 6.66E-16 | 3.37E-15 | yes |
| HTH-type transcriptional repressor cytR                             | JZ6_10 | TZ19_10 | OK | 75.8651 | 165.091 | 8.38E-07 | 2.29E-06 | yes |
| SH3 domain protein                                                  | JZ6_10 | TZ19_10 | OK | 144.755 | 313.634 | 2.09E-06 | 5.48E-06 | yes |
| N-acetylglucosamine-6-phosphate deacetylase                         | JZ6_10 | TZ19_10 | OK | 152.089 | 329.091 | 1.21E-13 | 5.40E-13 | yes |
| Ribosomal protein S11                                               | JZ6_10 | TZ19_10 | OK | 1747.31 | 3772.15 | 0        | 0        | yes |
| Na(+)-translocating NADH-quinone reductase subunit B                | JZ6_10 | TZ19_10 | OK | 252.146 | 543.656 | 0        | 0        | yes |
| ParA family protein                                                 | JZ6_10 | TZ19_10 | OK | 883.396 | 1902.21 | 0        | 0        | yes |
| NifU-related protein                                                | JZ6_10 | TZ19_10 | OK | 455.92  | 980.489 | 1.73E-07 | 5.02E-07 | yes |
| Chaperone protein torD                                              | JZ6_10 | TZ19_10 | OK | 1094.38 | 2352.79 | 0        | 0        | yes |

|                                                            |        |         |    |         |         |          |          |     |
|------------------------------------------------------------|--------|---------|----|---------|---------|----------|----------|-----|
| Guanosine-5'-triphosphate,3'-diphosphate pyrophosphatase   | JZ6_10 | TZ19_10 | OK | 74.8926 | 160.755 | 5.06E-10 | 1.80E-09 | yes |
| Conserved hypothetical protein                             | JZ6_10 | TZ19_10 | OK | 341648  | 733195  | 0        | 0        | yes |
| ATP-dependent Lon protease                                 | JZ6_10 | TZ19_10 | OK | 171.182 | 367.324 | 0        | 0        | yes |
| Cytochrome c-type biogenesis protein ccmF                  | JZ6_10 | TZ19_10 | OK | 50.8073 | 108.711 | 1.47E-08 | 4.69E-08 | yes |
| Cytochrome c4 precursor                                    | JZ6_10 | TZ19_10 | OK | 1028.98 | 2197.99 | 0        | 0        | yes |
| Glutathione reductase                                      | JZ6_10 | TZ19_10 | OK | 111.934 | 238.968 | 6.92E-12 | 2.80E-11 | yes |
| Protein recA (Recombinase A)                               | JZ6_10 | TZ19_10 | OK | 969.042 | 2066.48 | 0        | 0        | yes |
| 60 kDa chaperonin (Protein Cpn60) (groEL protein)          | JZ6_10 | TZ19_10 | OK | 178.571 | 379.467 | 0        | 0        | yes |
| Probable sigma(54) modulation protein                      | JZ6_10 | TZ19_10 | OK | 2787.92 | 5914.93 | 0        | 0        | yes |
| Diaminopimelate decarboxylase                              | JZ6_10 | TZ19_10 | OK | 138.884 | 294.503 | 6.02E-13 | 2.59E-12 | yes |
| Conserved hypothetical protein                             | JZ6_10 | TZ19_10 | OK | 168.122 | 356.326 | 0        | 0        | yes |
| putative lipoprotein                                       | JZ6_10 | TZ19_10 | OK | 338.483 | 715.978 | 8.34E-12 | 3.36E-11 | yes |
| Sugar fermentation stimulation protein homolog             | JZ6_10 | TZ19_10 | OK | 481.492 | 1018.1  | 0        | 0        | yes |
| Fatty acid metabolism regulator protein                    | JZ6_10 | TZ19_10 | OK | 1556.1  | 3281    | 0        | 0        | yes |
| Dihydroorotase                                             | JZ6_10 | TZ19_10 | OK | 172.723 | 364.034 | 8.22E-15 | 3.93E-14 | yes |
| putative Na <sup>+</sup> /H <sup>+</sup> antiporter        | JZ6_10 | TZ19_10 | OK | 55.4222 | 116.502 | 1.09E-06 | 2.95E-06 | yes |
| Oligopeptide transport ATP-binding protein oppD            | JZ6_10 | TZ19_10 | OK | 105.695 | 221.927 | 9.38E-08 | 2.80E-07 | yes |
| LuxT regulator                                             | JZ6_10 | TZ19_10 | OK | 657.55  | 1377.68 | 2.82E-14 | 1.31E-13 | yes |
| SspB                                                       | JZ6_10 | TZ19_10 | OK | 376.917 | 788.433 | 2.95E-10 | 1.07E-09 | yes |
| Hypothetical protein                                       | JZ6_10 | TZ19_10 | OK | 192.351 | 402.076 | 4.82E-07 | 1.34E-06 | yes |
| Predicted N-acetylglucosaminyl transferase                 | JZ6_10 | TZ19_10 | OK | 126.513 | 263.691 | 1.97E-11 | 7.73E-11 | yes |
| predicted N6-adenine-specific DNA methylase                | JZ6_10 | TZ19_10 | OK | 52.2497 | 108.871 | 1.18E-08 | 3.80E-08 | yes |
| hypothetical protein                                       | JZ6_10 | TZ19_10 | OK | 221.284 | 460.961 | 1.59E-07 | 4.63E-07 | yes |
| Erythronate-4-phosphate dehydrogenase                      | JZ6_10 | TZ19_10 | OK | 133.535 | 277.218 | 4.76E-11 | 1.82E-10 | yes |
| Long-chain fatty acid transport protein precursor          | JZ6_10 | TZ19_10 | OK | 371.154 | 770.267 | 0        | 0        | yes |
| Preprotein translocase subunit SecG                        | JZ6_10 | TZ19_10 | OK | 11612.9 | 23999.2 | 0        | 0        | yes |
| Phosphate acetyltransferase                                | JZ6_10 | TZ19_10 | OK | 94.3627 | 194.748 | 1.11E-15 | 5.56E-15 | yes |
| manganese-dependent inorganic pyrophosphatase              | JZ6_10 | TZ19_10 | OK | 1551.39 | 3197.23 | 0        | 0        | yes |
| putative permease                                          | JZ6_10 | TZ19_10 | OK | 175.766 | 362.096 | 6.59E-14 | 2.99E-13 | yes |
| Succinyl-CoA synthetase beta chain                         | JZ6_10 | TZ19_10 | OK | 204.742 | 420.875 | 0        | 0        | yes |
| Fatty oxidation complex, alpha subunit                     | JZ6_10 | TZ19_10 | OK | 118.744 | 243.803 | 0        | 0        | yes |
| Transcriptional regulator of succinylCoA synthetase operon | JZ6_10 | TZ19_10 | OK | 260.444 | 534.735 | 6.87E-11 | 2.60E-10 | yes |

|                                                                      |        |         |    |         |         |          |          |     |
|----------------------------------------------------------------------|--------|---------|----|---------|---------|----------|----------|-----|
| N utilization substance protein B homolog                            | JZ6_10 | TZ19_10 | OK | 1287.48 | 2641.52 | 0        | 0        | yes |
| Succinylglutamic semialdehyde dehydrogenase                          | JZ6_10 | TZ19_10 | OK | 60.5602 | 124.142 | 3.52E-07 | 9.92E-07 | yes |
| DNA-binding protein HU-beta                                          | JZ6_10 | TZ19_10 | OK | 9129.82 | 18700   | 0        | 0        | yes |
| Peptidoglycan-associated lipoprotein precursor                       | JZ6_10 | TZ19_10 | OK | 1604.2  | 3280.36 | 0        | 0        | yes |
| Hypothetical UPF0325 protein                                         | JZ6_10 | TZ19_10 | OK | 5915.81 | 12082.3 | 0        | 0        | yes |
| NADH dehydrogenase                                                   | JZ6_10 | TZ19_10 | OK | 98.6263 | 199.918 | 2.20E-09 | 7.44E-09 | yes |
| Probable tRNA(5-methylaminomethyl-2-thiouridylate)-methyltransferase | JZ6_10 | TZ19_10 | OK | 155.475 | 314.436 | 9.71E-12 | 3.89E-11 | yes |
| Ubiquinone/menaquinone biosynthesis methyltransferase ubiE           | JZ6_10 | TZ19_10 | OK | 327.179 | 659.975 | 2.89E-15 | 1.41E-14 | yes |
| NADP-dependent malic enzyme                                          | JZ6_10 | TZ19_10 | OK | 107.609 | 216.902 | 1.91E-09 | 6.49E-09 | yes |
| CTP synthase (UTP--ammonia ligase)                                   | JZ6_10 | TZ19_10 | OK | 2580.64 | 5187.52 | 0        | 0        | yes |
| ParA family protein                                                  | JZ6_10 | TZ19_10 | OK | 112.34  | 225.688 | 1.39E-09 | 4.76E-09 | yes |
| 1,4-dihydroxy-2-naphthoate octaprenyltransferase                     | JZ6_10 | TZ19_10 | OK | 162.491 | 326.379 | 1.75E-09 | 5.97E-09 | yes |
| 50S ribosomal subunit protein L20                                    | JZ6_10 | TZ19_10 | OK | 7077.76 | 14162.6 | 0        | 0        | yes |
| Hypothetical protein                                                 | JZ6_10 | TZ19_10 | OK | 455.339 | 225.938 | 7.88E-08 | 2.37E-07 | yes |
| tRNA modification GTPase trmE                                        | JZ6_10 | TZ19_10 | OK | 131.94  | 65.3867 | 2.15E-07 | 6.21E-07 | yes |
| Periplasmic dipeptide transport protein precursor                    | JZ6_10 | TZ19_10 | OK | 801.343 | 394.833 | 0        | 0        | yes |
| Peptidase B                                                          | JZ6_10 | TZ19_10 | OK | 478.422 | 233.923 | 0        | 0        | yes |
| ATP-dependent helicase                                               | JZ6_10 | TZ19_10 | OK | 59.524  | 29.0348 | 9.21E-10 | 3.21E-09 | yes |
| Uroporphyrinogen-III synthase                                        | JZ6_10 | TZ19_10 | OK | 358.083 | 174.438 | 4.01E-08 | 1.23E-07 | yes |
| Ribosomal RNA large subunit methyltransferase                        | JZ6_10 | TZ19_10 | OK | 357.713 | 173.963 | 2.39E-10 | 8.72E-10 | yes |
| methyl-accepting chemotaxis protein                                  | JZ6_10 | TZ19_10 | OK | 112.759 | 54.7186 | 2.30E-06 | 5.99E-06 | yes |
| Conserved hypothetical protein                                       | JZ6_10 | TZ19_10 | OK | 409.672 | 198.467 | 3.54E-06 | 9.04E-06 | yes |
| preprotein translocase, SecE subunit                                 | JZ6_10 | TZ19_10 | OK | 11835.6 | 5704.14 | 0        | 0        | yes |
| ATP synthase epsilon chain                                           | JZ6_10 | TZ19_10 | OK | 4383.41 | 2112.53 | 0        | 0        | yes |
| chlorohydrolase/deaminase family protein                             | JZ6_10 | TZ19_10 | OK | 125.097 | 59.1091 | 2.20E-07 | 6.35E-07 | yes |
| conserved hypothetical protein                                       | JZ6_10 | TZ19_10 | OK | 594.9   | 280.924 | 4.44E-16 | 2.26E-15 | yes |
| UDP-N-acetylglucosamine 1-carboxyvinyltransferase                    | JZ6_10 | TZ19_10 | OK | 835.671 | 393.444 | 0        | 0        | yes |
| GTP-binding protein era homolog                                      | JZ6_10 | TZ19_10 | OK | 2160.47 | 1014.86 | 0        | 0        | yes |
| Phosphoserine phosphatase                                            | JZ6_10 | TZ19_10 | OK | 422.333 | 197.08  | 2.44E-09 | 8.21E-09 | yes |
| long-chain acyl-CoA synthetase                                       | JZ6_10 | TZ19_10 | OK | 150.581 | 69.7091 | 2.25E-10 | 8.23E-10 | yes |
| ABC transporter: Substrate-binding protein precursor                 | JZ6_10 | TZ19_10 | OK | 107.275 | 49.5232 | 2.40E-06 | 6.25E-06 | yes |
| Membrane protein                                                     | JZ6_10 | TZ19_10 | OK | 554.128 | 254.702 | 0        | 0        | yes |

|                                                                                |        |         |    |         |         |          |          |     |
|--------------------------------------------------------------------------------|--------|---------|----|---------|---------|----------|----------|-----|
| Transcriptional regulator, LysR family                                         | JZ6_10 | TZ19_10 | OK | 1922.21 | 876.903 | 0        | 0        | yes |
| putative nucleoprotein/polynucleotide-associated enzyme                        | JZ6_10 | TZ19_10 | OK | 540.053 | 246.023 | 1.47E-07 | 4.30E-07 | yes |
| hypothetical protein                                                           | JZ6_10 | TZ19_10 | OK | 351.659 | 160.074 | 3.44E-06 | 8.81E-06 | yes |
| Formyltetrahydrofolate deformylase                                             | JZ6_10 | TZ19_10 | OK | 208.944 | 94.1848 | 3.13E-07 | 8.86E-07 | yes |
| Topoisomerase IV subunit A                                                     | JZ6_10 | TZ19_10 | OK | 72.1869 | 32.5265 | 1.15E-07 | 3.39E-07 | yes |
| FKBP-type 16 kDa peptidyl-prolyl cis-trans isomerase                           | JZ6_10 | TZ19_10 | OK | 734.414 | 330.068 | 1.06E-08 | 3.41E-08 | yes |
| Protein hflC                                                                   | JZ6_10 | TZ19_10 | OK | 1465.46 | 655.42  | 0        | 0        | yes |
| hypothetical regulatory components of sensory transduction                     | JZ6_10 | TZ19_10 | OK | 523.639 | 233.857 | 0        | 0        | yes |
| Catalase                                                                       | JZ6_10 | TZ19_10 | OK | 199.548 | 88.4654 | 7.91E-13 | 3.38E-12 | yes |
| Conserved hypothetical protein; putative hemolysin-type calcium-binding region | JZ6_10 | TZ19_10 | OK | 17.6101 | 7.77094 | 3.50E-12 | 1.44E-11 | yes |
| Iron-containing alcohol dehydrogenase                                          | JZ6_10 | TZ19_10 | OK | 467.209 | 204.994 | 0        | 0        | yes |
| hypothetical protein                                                           | JZ6_10 | TZ19_10 | OK | 266.288 | 116.129 | 1.92E-08 | 6.08E-08 | yes |
| phosphoglucomutase/phosphomannomutase family protein MrsA                      | JZ6_10 | TZ19_10 | OK | 99.3337 | 43.2225 | 1.62E-06 | 4.31E-06 | yes |
| tRNA pseudouridine 55 synthase                                                 | JZ6_10 | TZ19_10 | OK | 203.748 | 88.6223 | 2.99E-08 | 9.30E-08 | yes |
| Conserved hypothetical protein                                                 | JZ6_10 | TZ19_10 | OK | 549.07  | 238.098 | 9.04E-07 | 2.46E-06 | yes |
| GTP cyclohydrolase I                                                           | JZ6_10 | TZ19_10 | OK | 453.159 | 196.047 | 8.48E-11 | 3.19E-10 | yes |
| 5'-nucleotidase/2',3'-cyclic phosphodiesterase                                 | JZ6_10 | TZ19_10 | OK | 500.154 | 215.876 | 0        | 0        | yes |
| hypothetical protein                                                           | JZ6_10 | TZ19_10 | OK | 390.21  | 168.145 | 4.82E-14 | 2.20E-13 | yes |
| Arylsulfatase regulator                                                        | JZ6_10 | TZ19_10 | OK | 140.012 | 60.2451 | 1.90E-08 | 6.00E-08 | yes |
| putative acetyltransferase                                                     | JZ6_10 | TZ19_10 | OK | 1176.25 | 500.207 | 0        | 0        | yes |
| hypothetical protein                                                           | JZ6_10 | TZ19_10 | OK | 171.478 | 72.2933 | 2.85E-08 | 8.89E-08 | yes |
| GTP-binding protein lepA                                                       | JZ6_10 | TZ19_10 | OK | 438.861 | 184.933 | 0        | 0        | yes |
| Uroporphyrin-III C-methyltransferase                                           | JZ6_10 | TZ19_10 | OK | 151.966 | 63.8911 | 3.44E-06 | 8.81E-06 | yes |
| Similar to ressure-regulated ORF-like protein                                  | JZ6_10 | TZ19_10 | OK | 2594.25 | 1086.38 | 0        | 0        | yes |
| hypothetical protein                                                           | JZ6_10 | TZ19_10 | OK | 762.706 | 318.599 | 0        | 0        | yes |
| ABC transporter: substrate binding protein precursor                           | JZ6_10 | TZ19_10 | OK | 120.826 | 50.2213 | 5.36E-12 | 2.18E-11 | yes |
| putative oligopeptidase F                                                      | JZ6_10 | TZ19_10 | OK | 76.5681 | 31.7865 | 1.41E-07 | 4.14E-07 | yes |
| Acyl hydratase                                                                 | JZ6_10 | TZ19_10 | OK | 1020.46 | 421.678 | 0        | 0        | yes |
| Conserved hypothetical protein                                                 | JZ6_10 | TZ19_10 | OK | 3695.17 | 1524.15 | 4.38E-09 | 1.45E-08 | yes |
| Valine-pyruvate aminotransferase                                               | JZ6_10 | TZ19_10 | OK | 113.288 | 46.6541 | 1.71E-08 | 5.43E-08 | yes |
| PTS system trehalose-specific EIIBC component                                  | JZ6_10 | TZ19_10 | OK | 158.106 | 65.0175 | 3.64E-10 | 1.31E-09 | yes |
| Translation elongation factor P                                                | JZ6_10 | TZ19_10 | OK | 2325.58 | 955.385 | 0        | 0        | yes |

|                                                                                |        |         |    |         |         |          |          |     |
|--------------------------------------------------------------------------------|--------|---------|----|---------|---------|----------|----------|-----|
| hypothetical protein                                                           | JZ6_10 | TZ19_10 | OK | 815.945 | 335.082 | 0        | 0        | yes |
| Arginine repressor                                                             | JZ6_10 | TZ19_10 | OK | 528.494 | 217.008 | 3.24E-07 | 9.17E-07 | yes |
| Conserved hypothetical protein                                                 | JZ6_10 | TZ19_10 | OK | 171.101 | 70.2339 | 6.48E-08 | 1.96E-07 | yes |
| 5'-nucleotidase/3'-cyclic phosphodiesterase                                    | JZ6_10 | TZ19_10 | OK | 181.213 | 73.4538 | 2.55E-13 | 1.12E-12 | yes |
| Transcriptional regulator, LysR family                                         | JZ6_10 | TZ19_10 | OK | 445.356 | 179.978 | 8.88E-16 | 4.47E-15 | yes |
| Protease IV (Endopeptidase IV)                                                 | JZ6_10 | TZ19_10 | OK | 137.056 | 55.2028 | 1.07E-12 | 4.54E-12 | yes |
| Sodium/glutamate symporter                                                     | JZ6_10 | TZ19_10 | OK | 117.206 | 46.9768 | 1.29E-07 | 3.81E-07 | yes |
| Ribulose-phosphate 3-epimerase                                                 | JZ6_10 | TZ19_10 | OK | 1299.71 | 520.921 | 0        | 0        | yes |
| Oligopeptidase A                                                               | JZ6_10 | TZ19_10 | OK | 248.126 | 99.4156 | 0        | 0        | yes |
| putative biotin carboxyl carrier protein                                       | JZ6_10 | TZ19_10 | OK | 380.989 | 151.329 | 2.85E-07 | 8.12E-07 | yes |
| hypothetical protein                                                           | JZ6_10 | TZ19_10 | OK | 8637.95 | 3425.58 | 0        | 0        | yes |
| Hypothetical protein                                                           | JZ6_10 | TZ19_10 | OK | 15401.1 | 6089.38 | 0        | 0        | yes |
| putative outer membrane protein                                                | JZ6_10 | TZ19_10 | OK | 417.581 | 164.289 | 1.72E-06 | 4.55E-06 | yes |
| ATP-dependent RNA helicase                                                     | JZ6_10 | TZ19_10 | OK | 513.101 | 201.713 | 0        | 0        | yes |
| outer membrane protein OmpA                                                    | JZ6_10 | TZ19_10 | OK | 365.388 | 143.563 | 0        | 0        | yes |
| 2,4-dienoyl-CoA reductase                                                      | JZ6_10 | TZ19_10 | OK | 127.447 | 49.9466 | 9.28E-14 | 4.16E-13 | yes |
| HemY protein                                                                   | JZ6_10 | TZ19_10 | OK | 108.336 | 42.4237 | 2.90E-07 | 8.22E-07 | yes |
| Ribonuclease G                                                                 | JZ6_10 | TZ19_10 | OK | 145.545 | 56.0288 | 1.40E-10 | 5.19E-10 | yes |
| hypothetical protein                                                           | JZ6_10 | TZ19_10 | OK | 45.6285 | 17.5237 | 8.65E-07 | 2.36E-06 | yes |
| hypothetical protein                                                           | JZ6_10 | TZ19_10 | OK | 1141.75 | 438.198 | 0        | 0        | yes |
| Na <sup>+</sup> /H <sup>+</sup> antiporter NhaD and related arsenite permeases | JZ6_10 | TZ19_10 | OK | 114.069 | 43.3299 | 1.62E-09 | 5.56E-09 | yes |
| Dihydrofolate reductase                                                        | JZ6_10 | TZ19_10 | OK | 636.017 | 241.524 | 5.01E-11 | 1.91E-10 | yes |
| Exodeoxyribonuclease III                                                       | JZ6_10 | TZ19_10 | OK | 223.74  | 84.7499 | 6.65E-09 | 2.18E-08 | yes |
| PhoH-like protein                                                              | JZ6_10 | TZ19_10 | OK | 142.284 | 53.723  | 4.49E-09 | 1.49E-08 | yes |
| GTP-binding protein typA/bipA                                                  | JZ6_10 | TZ19_10 | OK | 2512    | 946.347 | 0        | 0        | yes |
| hypothetical protein                                                           | JZ6_10 | TZ19_10 | OK | 4208.34 | 1578.87 | 0        | 0        | yes |
| Thiamine biosynthesis protein thiI                                             | JZ6_10 | TZ19_10 | OK | 644.15  | 240.908 | 0        | 0        | yes |
| Outer membrane protein                                                         | JZ6_10 | TZ19_10 | OK | 1596.33 | 595.93  | 0        | 0        | yes |
| Carbon starvation protein CstA                                                 | JZ6_10 | TZ19_10 | OK | 80.9335 | 30.1206 | 1.10E-07 | 3.25E-07 | yes |
| pyridine nucleotide-disulfide oxidoreductase, class I                          | JZ6_10 | TZ19_10 | OK | 81.9096 | 30.0893 | 2.38E-07 | 6.83E-07 | yes |
| Acyl carrier protein                                                           | JZ6_10 | TZ19_10 | OK | 48634.1 | 17821   | 0        | 0        | yes |
| Pyridoxamine-phosphate oxidase                                                 | JZ6_10 | TZ19_10 | OK | 357.175 | 130.694 | 1.33E-11 | 5.30E-11 | yes |

|                                                                             |        |         |    |         |         |          |          |     |
|-----------------------------------------------------------------------------|--------|---------|----|---------|---------|----------|----------|-----|
| Hypothetical protein                                                        | JZ6_10 | TZ19_10 | OK | 1817.14 | 662.575 | 4.44E-16 | 2.26E-15 | yes |
| hypothetical protein                                                        | JZ6_10 | TZ19_10 | OK | 1201.54 | 437.685 | 1.22E-11 | 4.85E-11 | yes |
| Conserved hypothetical protein                                              | JZ6_10 | TZ19_10 | OK | 99.7572 | 36.2532 | 2.09E-06 | 5.49E-06 | yes |
| D-alanine--D-alanine ligase                                                 | JZ6_10 | TZ19_10 | OK | 129.799 | 47.0365 | 7.46E-07 | 2.05E-06 | yes |
| succinylglutamate desuccinylase                                             | JZ6_10 | TZ19_10 | OK | 611.331 | 221.176 | 0        | 0        | yes |
| Hypothetical protein                                                        | JZ6_10 | TZ19_10 | OK | 518.241 | 186.169 | 0        | 0        | yes |
| Transcriptional regulator                                                   | JZ6_10 | TZ19_10 | OK | 199.79  | 71.3485 | 4.44E-16 | 2.26E-15 | yes |
| Conserved hypothetical protein                                              | JZ6_10 | TZ19_10 | OK | 100.719 | 35.6468 | 2.26E-09 | 7.64E-09 | yes |
| Nitrogen regulatory protein                                                 | JZ6_10 | TZ19_10 | OK | 668.283 | 234.706 | 4.15E-12 | 1.70E-11 | yes |
| ABC transporter, ATP-binding protein                                        | JZ6_10 | TZ19_10 | OK | 131.331 | 45.6468 | 3.61E-06 | 9.23E-06 | yes |
| membrane protein HemX                                                       | JZ6_10 | TZ19_10 | OK | 177.986 | 61.3198 | 1.21E-13 | 5.41E-13 | yes |
| Conserved hypothetical protein                                              | JZ6_10 | TZ19_10 | OK | 513.003 | 176.18  | 0        | 0        | yes |
| putative outer membrane lipoprotein                                         | JZ6_10 | TZ19_10 | OK | 143874  | 49098.4 | 0        | 0        | yes |
| Dihydrolipoyl dehydrogenase                                                 | JZ6_10 | TZ19_10 | OK | 292.517 | 99.6635 | 0        | 0        | yes |
| Pyridoxal phosphate biosynthetic protein pdxJ                               | JZ6_10 | TZ19_10 | OK | 546.846 | 185.513 | 0        | 0        | yes |
| hypothetical protein                                                        | JZ6_10 | TZ19_10 | OK | 1211.98 | 409.041 | 4.71E-07 | 1.32E-06 | yes |
| Conserved hypothetical protein                                              | JZ6_10 | TZ19_10 | OK | 240.449 | 80.5954 | 2.35E-07 | 6.74E-07 | yes |
| Protease degQ precursor                                                     | JZ6_10 | TZ19_10 | OK | 275.793 | 92.3697 | 0        | 0        | yes |
| hypothetical protein                                                        | JZ6_10 | TZ19_10 | OK | 1247.19 | 416.265 | 5.34E-10 | 1.89E-09 | yes |
| Methylglyoxal synthase                                                      | JZ6_10 | TZ19_10 | OK | 359.293 | 119.521 | 3.47E-07 | 9.79E-07 | yes |
| putative amino acid ABC transporter, periplasmic amino acid-binding portion | JZ6_10 | TZ19_10 | OK | 871.099 | 289.471 | 0        | 0        | yes |
| DNA polymerase III, epsilon subunit                                         | JZ6_10 | TZ19_10 | OK | 318.34  | 105.555 | 1.58E-12 | 6.63E-12 | yes |
| Probable amino-acid ABC transporter ATP-binding protein                     | JZ6_10 | TZ19_10 | OK | 120.215 | 39.4476 | 3.11E-06 | 7.99E-06 | yes |
| hypothetical protein                                                        | JZ6_10 | TZ19_10 | OK | 459.454 | 150.312 | 0        | 0        | yes |
| hypothetical protein                                                        | JZ6_10 | TZ19_10 | OK | 318.758 | 103.913 | 0        | 0        | yes |
| Hypothetical protein                                                        | JZ6_10 | TZ19_10 | OK | 191.521 | 61.6565 | 2.62E-06 | 6.80E-06 | yes |
| ATPase                                                                      | JZ6_10 | TZ19_10 | OK | 100.135 | 32.1731 | 0        | 0        | yes |
| transcriptional regulator, LuxR family                                      | JZ6_10 | TZ19_10 | OK | 248.882 | 79.8585 | 1.13E-08 | 3.63E-08 | yes |
| hypothetical translation factor                                             | JZ6_10 | TZ19_10 | OK | 598.245 | 189.145 | 2.22E-16 | 1.15E-15 | yes |
| hypothetical protein                                                        | JZ6_10 | TZ19_10 | OK | 14932.8 | 4696.11 | 0        | 0        | yes |
| Protein flaG                                                                | JZ6_10 | TZ19_10 | OK | 1213.05 | 378.517 | 0        | 0        | yes |
| GTP1/Obg family protein                                                     | JZ6_10 | TZ19_10 | OK | 1055.26 | 327.075 | 0        | 0        | yes |



|                                                                                                                    |        |         |    |         |         |          |          |     |
|--------------------------------------------------------------------------------------------------------------------|--------|---------|----|---------|---------|----------|----------|-----|
| hypothetical protein                                                                                               | JZ6_10 | TZ19_10 | OK | 76.7347 | 23.727  | 1.51E-07 | 4.40E-07 | yes |
| Deoxyribodipyrimidine photolyase                                                                                   | JZ6_10 | TZ19_10 | OK | 159.149 | 49.1525 | 4.44E-16 | 2.26E-15 | yes |
| ABC transporter: Transmembrane protein                                                                             | JZ6_10 | TZ19_10 | OK | 199.363 | 61.5719 | 0        | 0        | yes |
| hypothetical protein                                                                                               | JZ6_10 | TZ19_10 | OK | 308.13  | 95.1015 | 1.03E-11 | 4.15E-11 | yes |
| 23S rRNA (guanosine-2'-O)-methyltransferase rlmB                                                                   | JZ6_10 | TZ19_10 | OK | 196.203 | 60.5379 | 1.61E-09 | 5.53E-09 | yes |
| hypothetical protein                                                                                               | JZ6_10 | TZ19_10 | OK | 33172.8 | 10211   | 0        | 0        | yes |
| Deoxyguanosinetriphosphate triphosphohydrolase-like protein                                                        | JZ6_10 | TZ19_10 | OK | 89.0812 | 27.3201 | 4.18E-09 | 1.39E-08 | yes |
| Cytochrome c-type protein TorC                                                                                     | JZ6_10 | TZ19_10 | OK | 664.605 | 203.258 | 0        | 0        | yes |
| hypothetical protein                                                                                               | JZ6_10 | TZ19_10 | OK | 237.029 | 71.8993 | 2.03E-10 | 7.44E-10 | yes |
| tRNA pseudouridine synthase D                                                                                      | JZ6_10 | TZ19_10 | OK | 159.306 | 48.1422 | 8.61E-11 | 3.23E-10 | yes |
| Prolipoprotein diacylglyceryltransferase                                                                           | JZ6_10 | TZ19_10 | OK | 326.611 | 98.652  | 1.11E-15 | 5.56E-15 | yes |
| cytochrome c-type protein                                                                                          | JZ6_10 | TZ19_10 | OK | 638.593 | 191.004 | 1.38E-14 | 6.50E-14 | yes |
| Ribosomal-protein-serine acetyltransferase                                                                         | JZ6_10 | TZ19_10 | OK | 251.112 | 75.0913 | 2.11E-07 | 6.09E-07 | yes |
| Conserved hypothetical protein                                                                                     | JZ6_10 | TZ19_10 | OK | 257.129 | 76.5392 | 1.67E-06 | 4.43E-06 | yes |
| Similar to ribosomal protein S15                                                                                   | JZ6_10 | TZ19_10 | OK | 23253.5 | 6868.55 | 0        | 0        | yes |
| Protein nrfC homolog precursor                                                                                     | JZ6_10 | TZ19_10 | OK | 326.669 | 96.391  | 2.75E-12 | 1.14E-11 | yes |
| Maf-like protein                                                                                                   | JZ6_10 | TZ19_10 | OK | 306.403 | 90.2799 | 3.53E-11 | 1.36E-10 | yes |
| UDP-N-acetylglucosamine--N-acetylmuramyl-(pentapeptide)pyrophosphoryl-undecaprenol N-acetylglucosamine transferase | JZ6_10 | TZ19_10 | OK | 217.734 | 64.0017 | 1.55E-15 | 7.72E-15 | yes |
| hypothetical protein                                                                                               | JZ6_10 | TZ19_10 | OK | 3623.34 | 1054.62 | 8.27E-11 | 3.11E-10 | yes |
| putative D-alanyl-D-alanine carboxypeptidase                                                                       | JZ6_10 | TZ19_10 | OK | 94.7772 | 27.4466 | 5.54E-08 | 1.69E-07 | yes |
| hypothetical protein                                                                                               | JZ6_10 | TZ19_10 | OK | 2481.41 | 718.064 | 1.08E-12 | 4.57E-12 | yes |
| putative transcriptional activator                                                                                 | JZ6_10 | TZ19_10 | OK | 148.759 | 43.0009 | 3.81E-07 | 1.07E-06 | yes |
| putative ATPase                                                                                                    | JZ6_10 | TZ19_10 | OK | 57.6931 | 16.57   | 5.53E-07 | 1.54E-06 | yes |
| phosphoenolpyruvate synthase                                                                                       | JZ6_10 | TZ19_10 | OK | 180.566 | 51.7145 | 2.98E-10 | 1.08E-09 | yes |
| predicted ATP-dependent endonuclease                                                                               | JZ6_10 | TZ19_10 | OK | 50.0356 | 14.1756 | 4.60E-07 | 1.29E-06 | yes |
| Hypothetical protein                                                                                               | JZ6_10 | TZ19_10 | OK | 110.949 | 31.0745 | 0        | 0        | yes |
| Probable cysteine desulfurase                                                                                      | JZ6_10 | TZ19_10 | OK | 107.12  | 29.9904 | 7.90E-10 | 2.76E-09 | yes |
| Transcriptional regulator                                                                                          | JZ6_10 | TZ19_10 | OK | 136.091 | 38.0098 | 1.69E-06 | 4.48E-06 | yes |
| Alkaline phosphatase III precursor                                                                                 | JZ6_10 | TZ19_10 | OK | 259.999 | 72.2684 | 0        | 0        | yes |
| Conserved hypothetical protein                                                                                     | JZ6_10 | TZ19_10 | OK | 197.634 | 54.7271 | 9.73E-13 | 4.13E-12 | yes |
| hypothetical protein                                                                                               | JZ6_10 | TZ19_10 | OK | 322.123 | 89.1776 | 2.66E-15 | 1.31E-14 | yes |

|                                                               |        |         |    |         |         |          |          |     |
|---------------------------------------------------------------|--------|---------|----|---------|---------|----------|----------|-----|
| Conserved hypothetical protein                                | JZ6_10 | TZ19_10 | OK | 207.09  | 57.1953 | 1.66E-13 | 7.35E-13 | yes |
| ABC transporter IM-ABC: Transmembrane and ATP binding protein | JZ6_10 | TZ19_10 | OK | 40.3879 | 10.9742 | 2.55E-07 | 7.29E-07 | yes |
| Methionine sulfoxide reductase                                | JZ6_10 | TZ19_10 | OK | 182.837 | 49.346  | 4.62E-14 | 2.11E-13 | yes |
| hypothetical protein                                          | JZ6_10 | TZ19_10 | OK | 30579.9 | 8214.01 | 0        | 0        | yes |
| nitrite reductase periplasmic cytochrome c552                 | JZ6_10 | TZ19_10 | OK | 1033.34 | 277.401 | 0        | 0        | yes |
| DNA mismatch repair protein mutS                              | JZ6_10 | TZ19_10 | OK | 52.5986 | 13.9131 | 7.87E-12 | 3.17E-11 | yes |
| Endonuclease III                                              | JZ6_10 | TZ19_10 | OK | 298.496 | 78.5013 | 3.60E-12 | 1.48E-11 | yes |
| Chemotaxis protein                                            | JZ6_10 | TZ19_10 | OK | 116.084 | 30.4472 | 1.74E-07 | 5.06E-07 | yes |
| universal stress protein A                                    | JZ6_10 | TZ19_10 | OK | 413.508 | 108.376 | 6.99E-08 | 2.11E-07 | yes |
| chemotactic transducer-related protein                        | JZ6_10 | TZ19_10 | OK | 30.9865 | 8.10245 | 6.17E-09 | 2.03E-08 | yes |
| sensor histidine kinase/response regulator                    | JZ6_10 | TZ19_10 | OK | 60.0667 | 15.6597 | 3.05E-09 | 1.02E-08 | yes |
| Hypothetical ABC transporter ATP-binding protein              | JZ6_10 | TZ19_10 | OK | 156.8   | 40.5471 | 0        | 0        | yes |
| putative hemolysin                                            | JZ6_10 | TZ19_10 | OK | 148.632 | 38.3938 | 0        | 0        | yes |
| Hypothetical protein                                          | JZ6_10 | TZ19_10 | OK | 832.402 | 213.886 | 2.22E-16 | 1.15E-15 | yes |
| RNA polymerase associated protein rapA                        | JZ6_10 | TZ19_10 | OK | 197.983 | 50.7266 | 0        | 0        | yes |
| transcriptional regulator, LuxR family                        | JZ6_10 | TZ19_10 | OK | 299.768 | 76.7928 | 3.52E-12 | 1.45E-11 | yes |
| putative permease perM                                        | JZ6_10 | TZ19_10 | OK | 71.5544 | 18.2418 | 2.10E-06 | 5.51E-06 | yes |
| Conserved hypothetical protein                                | JZ6_10 | TZ19_10 | OK | 414.682 | 104.455 | 7.51E-07 | 2.06E-06 | yes |
| hypothetical protein                                          | JZ6_10 | TZ19_10 | OK | 109.99  | 27.6095 | 2.12E-11 | 8.32E-11 | yes |
| putative Holliday junction resolvase                          | JZ6_10 | TZ19_10 | OK | 648.155 | 162.651 | 3.18E-14 | 1.47E-13 | yes |
| hypothetical protein                                          | JZ6_10 | TZ19_10 | OK | 79.8809 | 19.8479 | 2.18E-07 | 6.28E-07 | yes |
| Glutamine amidotransferases class-II                          | JZ6_10 | TZ19_10 | OK | 231.376 | 57.3442 | 1.02E-12 | 4.31E-12 | yes |
| Arabinose 5-phosphate isomerase                               | JZ6_10 | TZ19_10 | OK | 114.937 | 28.3082 | 9.63E-10 | 3.35E-09 | yes |
| 3-deoxy-D-manno-octulosonate 8-phosphate phosphatase          | JZ6_10 | TZ19_10 | OK | 604.594 | 148.442 | 0        | 0        | yes |
| Conserved hypothetical protein                                | JZ6_10 | TZ19_10 | OK | 47.3092 | 11.4423 | 5.44E-13 | 2.34E-12 | yes |
| Hypothetical protein                                          | JZ6_10 | TZ19_10 | OK | 6351.87 | 1524.7  | 2.35E-10 | 8.59E-10 | yes |
| Hypothetical protein                                          | JZ6_10 | TZ19_10 | OK | 893.647 | 212.83  | 2.22E-16 | 1.15E-15 | yes |
| Phosphoadenosine phosphosulfate reductase                     | JZ6_10 | TZ19_10 | OK | 109.946 | 26.1248 | 1.76E-06 | 4.66E-06 | yes |
| Probable GTP-binding protein                                  | JZ6_10 | TZ19_10 | OK | 666.949 | 158.4   | 0        | 0        | yes |
| hypothetical arginine repressor                               | JZ6_10 | TZ19_10 | OK | 594.904 | 140.548 | 0        | 0        | yes |
| ABC transporter: substrate binding protein precursor          | JZ6_10 | TZ19_10 | OK | 151.885 | 35.8751 | 2.22E-16 | 1.15E-15 | yes |
| DNA polymerase III subunit tau                                | JZ6_10 | TZ19_10 | OK | 193.909 | 45.4014 | 0        | 0        | yes |

|                                                                |        |         |    |         |         |          |          |     |
|----------------------------------------------------------------|--------|---------|----|---------|---------|----------|----------|-----|
| ABC transporter: Transmembrane protein                         | JZ6_10 | TZ19_10 | OK | 139.94  | 32.536  | 5.04E-13 | 2.18E-12 | yes |
| Acyl-coenzyme A dehydrogenase                                  | JZ6_10 | TZ19_10 | OK | 71.039  | 16.4215 | 2.22E-16 | 1.15E-15 | yes |
| hypothetical protein                                           | JZ6_10 | TZ19_10 | OK | 363.175 | 83.6518 | 4.92E-08 | 1.50E-07 | yes |
| tRNA pseudouridine synthase C                                  | JZ6_10 | TZ19_10 | OK | 107.307 | 24.7148 | 1.46E-06 | 3.89E-06 | yes |
| Cation/multidrug efflux pump                                   | JZ6_10 | TZ19_10 | OK | 73.3043 | 16.8718 | 0        | 0        | yes |
| Molybdenum cofactor biosynthesis protein E                     | JZ6_10 | TZ19_10 | OK | 394.252 | 90.1725 | 1.60E-10 | 5.92E-10 | yes |
| Conserved hypothetical protein                                 | JZ6_10 | TZ19_10 | OK | 229.313 | 52.4126 | 1.35E-13 | 6.01E-13 | yes |
| NADH dehydrogenase subunit II-related protein                  | JZ6_10 | TZ19_10 | OK | 41246.1 | 9425.57 | 0        | 0        | yes |
| O-succinylbenzoate synthase                                    | JZ6_10 | TZ19_10 | OK | 107.59  | 24.5508 | 4.04E-08 | 1.24E-07 | yes |
| Protein cyaY                                                   | JZ6_10 | TZ19_10 | OK | 15017.7 | 3390.11 | 0        | 0        | yes |
| Riboflavin synthase alpha chain                                | JZ6_10 | TZ19_10 | OK | 197.004 | 43.9731 | 1.69E-08 | 5.38E-08 | yes |
| hypothetical protein                                           | JZ6_10 | TZ19_10 | OK | 191.404 | 42.2606 | 8.75E-13 | 3.73E-12 | yes |
| Protoheme IX farnesyltransferase                               | JZ6_10 | TZ19_10 | OK | 88.6007 | 19.3094 | 2.72E-07 | 7.75E-07 | yes |
| AcrB/AcrD/AcrF family                                          | JZ6_10 | TZ19_10 | OK | 35.8746 | 7.78481 | 1.16E-10 | 4.33E-10 | yes |
| Cell division protein ftsW                                     | JZ6_10 | TZ19_10 | OK | 65.5057 | 13.99   | 4.53E-07 | 1.27E-06 | yes |
| UDP-3-O-                                                       | JZ6_10 | TZ19_10 | OK | 665.557 | 138.966 | 0        | 0        | yes |
| quinolone resistance determinant (experimentally demonstrated) | JZ6_10 | TZ19_10 | OK | 183.469 | 38.1859 | 9.75E-09 | 3.16E-08 | yes |
| Cell division protein ftsY                                     | JZ6_10 | TZ19_10 | OK | 817.819 | 169.845 | 0        | 0        | yes |
| hypothetical protein                                           | JZ6_10 | TZ19_10 | OK | 72.8111 | 15.0278 | 1.81E-11 | 7.12E-11 | yes |
| Collagenase and related protease                               | JZ6_10 | TZ19_10 | OK | 60.1132 | 12.2435 | 1.89E-12 | 7.92E-12 | yes |
| Flp pilus assembly protein                                     | JZ6_10 | TZ19_10 | OK | 154.652 | 31.4032 | 0        | 0        | yes |
| Signal transduction histidine kinase                           | JZ6_10 | TZ19_10 | OK | 30.0595 | 6.10091 | 1.47E-08 | 4.68E-08 | yes |
| hypothetical protein                                           | JZ6_10 | TZ19_10 | OK | 1174.01 | 237.782 | 0        | 0        | yes |
| sodium/dicarboxylate symporter                                 | JZ6_10 | TZ19_10 | OK | 115.309 | 23.2777 | 1.15E-14 | 5.47E-14 | yes |
| Ferrochelatase (Protoheme ferro-lyase)                         | JZ6_10 | TZ19_10 | OK | 172.825 | 33.8775 | 1.11E-15 | 5.56E-15 | yes |
| putative membrane protein                                      | JZ6_10 | TZ19_10 | OK | 62.4287 | 12.2205 | 7.65E-07 | 2.10E-06 | yes |
| Diaminobutyrate--2-oxoglutarate aminotransferase               | JZ6_10 | TZ19_10 | OK | 49.5599 | 9.57785 | 2.20E-14 | 1.03E-13 | yes |
| DNA recombination protein rmuC homolog                         | JZ6_10 | TZ19_10 | OK | 93.3021 | 17.8179 | 1.52E-13 | 6.72E-13 | yes |
| Conserved hypothetical protein                                 | JZ6_10 | TZ19_10 | OK | 69.0543 | 13.0924 | 0        | 0        | yes |
| 5-carboxymethyl-2-hydroxymuconate isomerase                    | JZ6_10 | TZ19_10 | OK | 1092.79 | 205.944 | 8.12E-13 | 3.46E-12 | yes |
| hypothetical protein                                           | JZ6_10 | TZ19_10 | OK | 4456.43 | 839.266 | 0        | 0        | yes |
| Hypothetical protein                                           | JZ6_10 | TZ19_10 | OK | 370.042 | 69.1124 | 0        | 0        | yes |

|                                                                                  |        |         |    |         |         |          |          |     |
|----------------------------------------------------------------------------------|--------|---------|----|---------|---------|----------|----------|-----|
| Riboflavin biosynthesis protein ribD                                             | JZ6_10 | TZ19_10 | OK | 94.0702 | 17.5422 | 5.48E-10 | 1.94E-09 | yes |
| Electron transport complex protein rnfE                                          | JZ6_10 | TZ19_10 | OK | 227.518 | 42.252  | 7.96E-11 | 3.00E-10 | yes |
| Protein mazG homolog                                                             | JZ6_10 | TZ19_10 | OK | 921.818 | 167.527 | 0        | 0        | yes |
| hypothetical protein                                                             | JZ6_10 | TZ19_10 | OK | 6295.7  | 1128.82 | 5.34E-10 | 1.89E-09 | yes |
| Periplasmic protein involved in polysaccharide export                            | JZ6_10 | TZ19_10 | OK | 69.5887 | 12.4552 | 4.17E-14 | 1.91E-13 | yes |
| ABC transporter: Membrane fusion protein                                         | JZ6_10 | TZ19_10 | OK | 144.171 | 25.6206 | 0        | 0        | yes |
| Conserved hypothetical protein                                                   | JZ6_10 | TZ19_10 | OK | 867.567 | 153.774 | 1.35E-06 | 3.62E-06 | yes |
| Nitroreductase family protein                                                    | JZ6_10 | TZ19_10 | OK | 216.006 | 38.281  | 4.37E-12 | 1.79E-11 | yes |
| Extracellular solute-binding protein, family 7                                   | JZ6_10 | TZ19_10 | OK | 257.664 | 45.6275 | 0        | 0        | yes |
| Malate synthase G                                                                | JZ6_10 | TZ19_10 | OK | 118.485 | 20.9104 | 0        | 0        | yes |
| hypothetical protein                                                             | JZ6_10 | TZ19_10 | OK | 4565.85 | 802.149 | 0        | 0        | yes |
| Glycogen synthase                                                                | JZ6_10 | TZ19_10 | OK | 171.205 | 29.9372 | 0        | 0        | yes |
| 1-acyl-sn-glycerol-3-phosphate acyltransferase                                   | JZ6_10 | TZ19_10 | OK | 437.353 | 75.8291 | 0        | 0        | yes |
| ABC transporter: Substrate binding protein precursor                             | JZ6_10 | TZ19_10 | OK | 91.3874 | 15.7751 | 3.75E-12 | 1.54E-11 | yes |
| Hypothetical ABC transporter ATP-binding protein                                 | JZ6_10 | TZ19_10 | OK | 124.364 | 21.39   | 3.78E-09 | 1.26E-08 | yes |
| Predicted flavodoxin oxidoreductases                                             | JZ6_10 | TZ19_10 | OK | 577.138 | 99.0939 | 0        | 0        | yes |
| Hypothetical protein                                                             | JZ6_10 | TZ19_10 | OK | 722.393 | 123.69  | 3.83E-08 | 1.18E-07 | yes |
| Membrane protein                                                                 | JZ6_10 | TZ19_10 | OK | 138.973 | 23.5845 | 1.77E-13 | 7.83E-13 | yes |
| Glutathione-regulated potassium-efflux system protein kefC (K(+)/H(+))antiporter | JZ6_10 | TZ19_10 | OK | 162.129 | 27.353  | 0        | 0        | yes |
| Glycerophosphoryl diester phosphodiesterase                                      | JZ6_10 | TZ19_10 | OK | 100.394 | 16.8588 | 9.06E-07 | 2.47E-06 | yes |
| Conserved hypothetical protein                                                   | JZ6_10 | TZ19_10 | OK | 330.262 | 55.4475 | 0        | 0        | yes |
| hypothetical protein                                                             | JZ6_10 | TZ19_10 | OK | 1254.65 | 210.34  | 3.00E-06 | 7.73E-06 | yes |
| CreA protein                                                                     | JZ6_10 | TZ19_10 | OK | 812.393 | 135.676 | 0        | 0        | yes |
| conserved hypothetical protein                                                   | JZ6_10 | TZ19_10 | OK | 345.125 | 57.1706 | 0        | 0        | yes |
| Membrane-fusion protein AcrA                                                     | JZ6_10 | TZ19_10 | OK | 78.5131 | 12.9229 | 2.88E-08 | 8.97E-08 | yes |
| ABC transporter: Substrate binding protein precursor                             | JZ6_10 | TZ19_10 | OK | 460.395 | 75.3839 | 0        | 0        | yes |
| 3-deoxy-manno-octulosonate cytidyltransferase                                    | JZ6_10 | TZ19_10 | OK | 108.628 | 17.5477 | 3.60E-07 | 1.02E-06 | yes |
| hypothetical protein                                                             | JZ6_10 | TZ19_10 | OK | 989.936 | 159.866 | 2.22E-16 | 1.15E-15 | yes |
| LuxO repressor protein                                                           | JZ6_10 | TZ19_10 | OK | 143.505 | 23.1239 | 0        | 0        | yes |
| DctQ, TRAP-type C4-dicarboxylate transport system, large permease component      | JZ6_10 | TZ19_10 | OK | 69.0494 | 10.9206 | 2.30E-09 | 7.77E-09 | yes |
| Hypothetical protein                                                             | JZ6_10 | TZ19_10 | OK | 2695.55 | 424.261 | 0        | 0        | yes |
| Lipid A biosynthesis lauroyl acyltransferase                                     | JZ6_10 | TZ19_10 | OK | 180.719 | 28.4258 | 4.44E-16 | 2.26E-15 | yes |

|                                                                      |        |         |    |         |         |          |          |     |
|----------------------------------------------------------------------|--------|---------|----|---------|---------|----------|----------|-----|
| Transcriptional regulatory protein tyrR                              | JZ6_10 | TZ19_10 | OK | 111.998 | 17.6028 | 3.33E-15 | 1.62E-14 | yes |
| Hypothetical protein                                                 | JZ6_10 | TZ19_10 | OK | 30203.1 | 4739.18 | 0        | 0        | yes |
| Hypothetical protein                                                 | JZ6_10 | TZ19_10 | OK | 557.233 | 87.0333 | 3.02E-12 | 1.25E-11 | yes |
| hypothetical protein                                                 | JZ6_10 | TZ19_10 | OK | 62.9414 | 9.82752 | 2.41E-07 | 6.93E-07 | yes |
| Autoinducer 2-binding periplasmic protein luxP precursor             | JZ6_10 | TZ19_10 | OK | 63.0129 | 9.67216 | 6.51E-07 | 1.80E-06 | yes |
| ABC transporter, permease protein                                    | JZ6_10 | TZ19_10 | OK | 188.82  | 28.378  | 3.35E-11 | 1.30E-10 | yes |
| UDP-N-acetylmuramoylalanine--D-glutamate ligase                      | JZ6_10 | TZ19_10 | OK | 174.616 | 25.9835 | 0        | 0        | yes |
| putative two-component sensor                                        | JZ6_10 | TZ19_10 | OK | 226.494 | 33.6627 | 0        | 0        | yes |
| hypothetical protein                                                 | JZ6_10 | TZ19_10 | OK | 67.1794 | 9.84403 | 1.01E-11 | 4.03E-11 | yes |
| putative LuxO repressor protein                                      | JZ6_10 | TZ19_10 | OK | 146.557 | 20.6578 | 0        | 0        | yes |
| Cytochrome c-type biogenesis protein ccmB (heme exporter protein B ) | JZ6_10 | TZ19_10 | OK | 197.023 | 27.727  | 1.30E-10 | 4.82E-10 | yes |
| putative GTP cyclohydrolase II                                       | JZ6_10 | TZ19_10 | OK | 438.15  | 61.2868 | 0        | 0        | yes |
| Acetolactate synthase isozyme III small subunit                      | JZ6_10 | TZ19_10 | OK | 529.029 | 73.8605 | 1.11E-15 | 5.56E-15 | yes |
| Tryptophanase (L-tryptophan indole-lyase)                            | JZ6_10 | TZ19_10 | OK | 354.204 | 49.0342 | 0        | 0        | yes |
| putative periplasmic protein                                         | JZ6_10 | TZ19_10 | OK | 1433.04 | 198.177 | 0        | 0        | yes |
| Hypothetical competence damage protein CinA                          | JZ6_10 | TZ19_10 | OK | 164.674 | 22.6364 | 0        | 0        | yes |
| Nuclease sbcCD subunit C                                             | JZ6_10 | TZ19_10 | OK | 26.5802 | 3.62164 | 3.04E-11 | 1.18E-10 | yes |
| putative Cys/Met metabolism pyridoxal-phosphate-dependent enzyme     | JZ6_10 | TZ19_10 | OK | 671.967 | 91.3247 | 0        | 0        | yes |
| putative muconate cycloisomerase                                     | JZ6_10 | TZ19_10 | OK | 141.453 | 19.1408 | 9.55E-14 | 4.28E-13 | yes |
| Hypothetical ABC transporter ATP-binding protein                     | JZ6_10 | TZ19_10 | OK | 39.6166 | 5.30083 | 2.84E-07 | 8.09E-07 | yes |
| Lysine-arginine-ornithine-binding periplasmic protein                | JZ6_10 | TZ19_10 | OK | 106.503 | 14.2029 | 2.71E-07 | 7.75E-07 | yes |
| hypothetical protein                                                 | JZ6_10 | TZ19_10 | OK | 1963.55 | 259.431 | 6.44E-15 | 3.09E-14 | yes |
| hypothetical protein                                                 | JZ6_10 | TZ19_10 | OK | 727.274 | 95.7562 | 0        | 0        | yes |
| Oxygen-independent coproporphyrinogen III oxidase-like protein       | JZ6_10 | TZ19_10 | OK | 86.21   | 11.3097 | 9.17E-12 | 3.69E-11 | yes |
| Osmotically inducible protein C                                      | JZ6_10 | TZ19_10 | OK | 206.53  | 27.0113 | 1.28E-06 | 3.44E-06 | yes |
| putative alkaline phosphatase                                        | JZ6_10 | TZ19_10 | OK | 736.695 | 94.6132 | 0        | 0        | yes |
| TPR-repeat-containing protein                                        | JZ6_10 | TZ19_10 | OK | 116.446 | 14.7697 | 2.00E-09 | 6.79E-09 | yes |
| Hypothetical protein                                                 | JZ6_10 | TZ19_10 | OK | 273.799 | 34.526  | 2.89E-14 | 1.34E-13 | yes |
| putative RNA-binding proteins                                        | JZ6_10 | TZ19_10 | OK | 8737.27 | 1081.52 | 0        | 0        | yes |
| Predicted periplasmic solute-binding protein                         | JZ6_10 | TZ19_10 | OK | 120.433 | 14.9074 | 1.35E-11 | 5.39E-11 | yes |
| putative secretion protein                                           | JZ6_10 | TZ19_10 | OK | 80.6554 | 9.97066 | 1.65E-09 | 5.63E-09 | yes |
| Transmembrane regulatory protein toxS                                | JZ6_10 | TZ19_10 | OK | 358.616 | 43.9677 | 1.70E-12 | 7.12E-12 | yes |

|                                                             |        |         |    |         |         |          |          |     |
|-------------------------------------------------------------|--------|---------|----|---------|---------|----------|----------|-----|
| ABC transporter: Membrane fusion protein                    | JZ6_10 | TZ19_10 | OK | 139.711 | 17.093  | 2.40E-14 | 1.12E-13 | yes |
| hypothetical protein                                        | JZ6_10 | TZ19_10 | OK | 10798.2 | 1295.75 | 8.88E-16 | 4.47E-15 | yes |
| Hypothetical protein                                        | JZ6_10 | TZ19_10 | OK | 234.11  | 28.0078 | 0        | 0        | yes |
| Conserved hypothetical protein                              | JZ6_10 | TZ19_10 | OK | 1383.08 | 164.525 | 0        | 0        | yes |
| Hypothetical protein                                        | JZ6_10 | TZ19_10 | OK | 514.808 | 60.6812 | 0        | 0        | yes |
| Peptide methionine sulfoxide reductase msrB                 | JZ6_10 | TZ19_10 | OK | 3993.64 | 469.548 | 0        | 0        | yes |
| putative membrane protein                                   | JZ6_10 | TZ19_10 | OK | 58.896  | 6.69755 | 1.29E-09 | 4.44E-09 | yes |
| Hypothetical response regulatory protein                    | JZ6_10 | TZ19_10 | OK | 289.209 | 32.2133 | 0        | 0        | yes |
| Lipase precursor                                            | JZ6_10 | TZ19_10 | OK | 73.3608 | 8.05794 | 1.26E-06 | 3.39E-06 | yes |
| putative permease                                           | JZ6_10 | TZ19_10 | OK | 94.9159 | 10.4152 | 1.63E-10 | 6.03E-10 | yes |
| putative smp protein                                        | JZ6_10 | TZ19_10 | OK | 106.993 | 11.6878 | 3.41E-06 | 8.73E-06 | yes |
| ABC transporter: Transmembrane protein                      | JZ6_10 | TZ19_10 | OK | 131.833 | 14.3481 | 1.08E-12 | 4.57E-12 | yes |
| Transcriptional regulator, AraC family                      | JZ6_10 | TZ19_10 | OK | 99.8424 | 10.6753 | 5.03E-08 | 1.54E-07 | yes |
| ABC transporter (IM-ABC)                                    | JZ6_10 | TZ19_10 | OK | 26.697  | 2.8468  | 9.98E-07 | 2.70E-06 | yes |
| conserved protein                                           | JZ6_10 | TZ19_10 | OK | 344.161 | 36.6498 | 8.95E-14 | 4.02E-13 | yes |
| Hypothetical protein                                        | JZ6_10 | TZ19_10 | OK | 2877.6  | 304.791 | 0        | 0        | yes |
| RNA polymerase sigma factor, sigma-70 family                | JZ6_10 | TZ19_10 | OK | 199.106 | 20.9888 | 1.32E-10 | 4.90E-10 | yes |
| Penicillin-insensitive murein endopeptidase precursor       | JZ6_10 | TZ19_10 | OK | 83.8356 | 8.79193 | 7.92E-07 | 2.17E-06 | yes |
| Hypothetical protein                                        | JZ6_10 | TZ19_10 | OK | 181.639 | 18.7871 | 5.55E-15 | 2.68E-14 | yes |
| MSHA biogenesis protein MshL                                | JZ6_10 | TZ19_10 | OK | 86.5548 | 8.80702 | 6.31E-14 | 2.86E-13 | yes |
| hypothetical membrane protein                               | JZ6_10 | TZ19_10 | OK | 45.1535 | 4.58483 | 5.43E-07 | 1.51E-06 | yes |
| Succinate dehydrogenase hydrophobic membrane anchor protein | JZ6_10 | TZ19_10 | OK | 599.571 | 60.2822 | 3.52E-10 | 1.27E-09 | yes |
| hypothetical protein                                        | JZ6_10 | TZ19_10 | OK | 278.535 | 28.0018 | 1.37E-06 | 3.68E-06 | yes |
| putative transcriptional regulator                          | JZ6_10 | TZ19_10 | OK | 282.097 | 28.1288 | 0        | 0        | yes |
| hypothetical protein                                        | JZ6_10 | TZ19_10 | OK | 32.377  | 3.22517 | 4.75E-07 | 1.33E-06 | yes |
| hypothetical protein                                        | JZ6_10 | TZ19_10 | OK | 977.069 | 96.9659 | 0        | 0        | yes |
| putative biofilm-associated surface protein                 | JZ6_10 | TZ19_10 | OK | 46.2166 | 4.48258 | 0        | 0        | yes |
| hypothetical protein                                        | JZ6_10 | TZ19_10 | OK | 3471.12 | 334.594 | 0        | 0        | yes |
| Lipase chaperone                                            | JZ6_10 | TZ19_10 | OK | 92.2027 | 8.84725 | 8.60E-08 | 2.57E-07 | yes |
| RpoS-like sigma factor                                      | JZ6_10 | TZ19_10 | OK | 728.066 | 67.8966 | 0        | 0        | yes |
| hypothetical protein                                        | JZ6_10 | TZ19_10 | OK | 453.287 | 41.8736 | 9.15E-14 | 4.11E-13 | yes |
| Conserved hypothetical protein                              | JZ6_10 | TZ19_10 | OK | 1143.66 | 105.512 | 0        | 0        | yes |

|                                                                   |        |         |    |         |         |          |          |     |
|-------------------------------------------------------------------|--------|---------|----|---------|---------|----------|----------|-----|
| Transglycosylase, Slt family                                      | JZ6_10 | TZ19_10 | OK | 286.314 | 25.9171 | 0        | 0        | yes |
| Flp pilus assembly protein                                        | JZ6_10 | TZ19_10 | OK | 189.81  | 17.0638 | 0        | 0        | yes |
| hypothetical protein                                              | JZ6_10 | TZ19_10 | OK | 75.6618 | 6.64645 | 2.67E-06 | 6.91E-06 | yes |
| Acyl-coenzyme A synthetases                                       | JZ6_10 | TZ19_10 | OK | 274.148 | 23.8115 | 0        | 0        | yes |
| Ribonuclease HI                                                   | JZ6_10 | TZ19_10 | OK | 190.361 | 16.3647 | 1.60E-11 | 6.32E-11 | yes |
| hypothetical protein                                              | JZ6_10 | TZ19_10 | OK | 237.441 | 20.347  | 6.23E-09 | 2.05E-08 | yes |
| ABC transport system, Transmembrane and ATP-binding site (ABC-IM) | JZ6_10 | TZ19_10 | OK | 48.9982 | 4.04581 | 1.03E-09 | 3.59E-09 | yes |
| putative cytochrome c, class I                                    | JZ6_10 | TZ19_10 | OK | 54.6764 | 4.47899 | 1.04E-08 | 3.35E-08 | yes |
| Conserved hypothetical protein                                    | JZ6_10 | TZ19_10 | OK | 243.034 | 19.7548 | 3.57E-06 | 9.12E-06 | yes |
| Conserved hypothetical protein                                    | JZ6_10 | TZ19_10 | OK | 4278.66 | 342.257 | 0        | 0        | yes |
| hypothetical protein                                              | JZ6_10 | TZ19_10 | OK | 2670.02 | 211.476 | 0        | 0        | yes |
| ABC transporter: Membrane fusion protein (MFP)                    | JZ6_10 | TZ19_10 | OK | 68.3034 | 5.31042 | 4.09E-09 | 1.36E-08 | yes |
| hypothetical protein                                              | JZ6_10 | TZ19_10 | OK | 1725.52 | 133.172 | 0        | 0        | yes |
| hypothetical protein                                              | JZ6_10 | TZ19_10 | OK | 1715.25 | 131.305 | 0        | 0        | yes |
| hypothetical protein                                              | JZ6_10 | TZ19_10 | OK | 14713.1 | 1100.79 | 0        | 0        | yes |
| ABC transporter: Transmembrane and ATP-binding protein            | JZ6_10 | TZ19_10 | OK | 136.434 | 9.32064 | 0        | 0        | yes |
| putative LysR-type regulator                                      | JZ6_10 | TZ19_10 | OK | 86.7438 | 5.90496 | 6.04E-07 | 1.67E-06 | yes |
| hypothetical protein                                              | JZ6_10 | TZ19_10 | OK | 380.532 | 25.7315 | 0        | 0        | yes |
| hypothetical protein                                              | JZ6_10 | TZ19_10 | OK | 138.586 | 9.24439 | 1.59E-09 | 5.45E-09 | yes |
| hypothetical protein                                              | JZ6_10 | TZ19_10 | OK | 234.863 | 15.4031 | 2.40E-08 | 7.54E-08 | yes |
| ABC transporter: transmembrane protein                            | JZ6_10 | TZ19_10 | OK | 64.1633 | 4.2032  | 2.76E-10 | 1.00E-09 | yes |
| hypothetical protein; putative exported protein                   | JZ6_10 | TZ19_10 | OK | 1241.53 | 78.8393 | 1.59E-06 | 4.23E-06 | yes |
| putative deoxycytidylate deaminase                                | JZ6_10 | TZ19_10 | OK | 5561.38 | 352.269 | 0        | 0        | yes |
| Transcriptional regulator                                         | JZ6_10 | TZ19_10 | OK | 313.956 | 19.3382 | 1.07E-14 | 5.06E-14 | yes |
| Multi antimicrobial extrusion protein MatE                        | JZ6_10 | TZ19_10 | OK | 65.321  | 3.98626 | 1.95E-09 | 6.63E-09 | yes |
| Conserved hypothetical protein                                    | JZ6_10 | TZ19_10 | OK | 79849.2 | 4845.6  | 0        | 0        | yes |
| hypothetical protein                                              | JZ6_10 | TZ19_10 | OK | 6967.27 | 419.098 | 0        | 0        | yes |
| putative sensor protein                                           | JZ6_10 | TZ19_10 | OK | 103.528 | 6.12771 | 8.33E-14 | 3.75E-13 | yes |
| hypothetical protein                                              | JZ6_10 | TZ19_10 | OK | 131.543 | 7.77519 | 1.31E-07 | 3.85E-07 | yes |
| AcrR, Transcriptional regulator                                   | JZ6_10 | TZ19_10 | OK | 597.618 | 35.1261 | 0        | 0        | yes |
| Conserved hypothetical protein                                    | JZ6_10 | TZ19_10 | OK | 154.161 | 8.7332  | 0        | 0        | yes |
| NOL1/NOP2/sun family protein                                      | JZ6_10 | TZ19_10 | OK | 172.009 | 9.70975 | 0        | 0        | yes |

|                                                              |        |         |    |         |         |          |          |     |
|--------------------------------------------------------------|--------|---------|----|---------|---------|----------|----------|-----|
| Glyoxalase family protein                                    | JZ6_10 | TZ19_10 | OK | 223.756 | 12.367  | 3.49E-07 | 9.86E-07 | yes |
| Hypothetical protein                                         | JZ6_10 | TZ19_10 | OK | 51.0579 | 2.74326 | 1.01E-08 | 3.26E-08 | yes |
| putative Glycosyl transferase                                | JZ6_10 | TZ19_10 | OK | 355.131 | 18.7712 | 0        | 0        | yes |
| conserved hypothetical protein                               | JZ6_10 | TZ19_10 | OK | 377.671 | 19.8161 | 4.77E-11 | 1.82E-10 | yes |
| Hypothetical UPF0105 protein yfch                            | JZ6_10 | TZ19_10 | OK | 276.004 | 14.3451 | 0        | 0        | yes |
| hypothetical protein                                         | JZ6_10 | TZ19_10 | OK | 1952.82 | 98.459  | 0        | 0        | yes |
| Conserved hypothetical protein                               | JZ6_10 | TZ19_10 | OK | 180.372 | 9.0261  | 6.36E-10 | 2.24E-09 | yes |
| Hypothetical protein                                         | JZ6_10 | TZ19_10 | OK | 393.804 | 19.5894 | 0        | 0        | yes |
| Protein nrfD                                                 | JZ6_10 | TZ19_10 | OK | 816.907 | 38.6441 | 0        | 0        | yes |
| Aconitase A                                                  | JZ6_10 | TZ19_10 | OK | 43.1637 | 2.03286 | 4.11E-11 | 1.58E-10 | yes |
| Hypothetical protein                                         | JZ6_10 | TZ19_10 | OK | 125.84  | 5.81356 | 3.06E-11 | 1.19E-10 | yes |
| putative periplasmic protein                                 | JZ6_10 | TZ19_10 | OK | 79.6162 | 3.62439 | 3.44E-07 | 9.71E-07 | yes |
| putative cold shock protein                                  | JZ6_10 | TZ19_10 | OK | 15978.2 | 722.279 | 0        | 0        | yes |
| ABC transporter: Transmembrane and ATP-binding protein       | JZ6_10 | TZ19_10 | OK | 316.893 | 13.7617 | 0        | 0        | yes |
| KtrA                                                         | JZ6_10 | TZ19_10 | OK | 152.466 | 6.59835 | 1.48E-06 | 3.94E-06 | yes |
| Polyphosphate kinase                                         | JZ6_10 | TZ19_10 | OK | 91.9833 | 3.80229 | 2.22E-16 | 1.15E-15 | yes |
| hypothetical protein                                         | JZ6_10 | TZ19_10 | OK | 214.169 | 8.65593 | 0        | 0        | yes |
| Membrane-associated phospholipid phosphatase                 | JZ6_10 | TZ19_10 | OK | 122.402 | 4.72198 | 1.46E-12 | 6.14E-12 | yes |
| Conserved hypothetical protein; putative GTP binding protein | JZ6_10 | TZ19_10 | OK | 62.7996 | 2.4189  | 7.34E-09 | 2.40E-08 | yes |
| hypothetical protein                                         | JZ6_10 | TZ19_10 | OK | 8489.92 | 326.007 | 0        | 0        | yes |
| Zn-dependent protease                                        | JZ6_10 | TZ19_10 | OK | 142.575 | 4.91568 | 0        | 0        | yes |
| Hypothetical protein                                         | JZ6_10 | TZ19_10 | OK | 29.1137 | 0.95007 | 1.43E-07 | 4.20E-07 | yes |
| transcriptional regulator, TetR family                       | JZ6_10 | TZ19_10 | OK | 308.379 | 9.9505  | 7.77E-13 | 3.32E-12 | yes |
| putative Cytochrome c biogenesis factor                      | JZ6_10 | TZ19_10 | OK | 352.818 | 11.0608 | 5.18E-13 | 2.23E-12 | yes |
| RecA regulator RecX                                          | JZ6_10 | TZ19_10 | OK | 169.149 | 5.09073 | 5.43E-09 | 1.79E-08 | yes |
| hypothetical protein                                         | JZ6_10 | TZ19_10 | OK | 765.519 | 22.9592 | 0        | 0        | yes |
| ABC transporter: Transmembrane protein                       | JZ6_10 | TZ19_10 | OK | 52.2864 | 1.56546 | 3.19E-12 | 1.32E-11 | yes |
| Hypothetical protein                                         | JZ6_10 | TZ19_10 | OK | 371.66  | 10.6626 | 4.32E-08 | 1.33E-07 | yes |
| putative transporter                                         | JZ6_10 | TZ19_10 | OK | 94.7966 | 2.64168 | 4.62E-07 | 1.29E-06 | yes |
| conserved hypothetical protein                               | JZ6_10 | TZ19_10 | OK | 653.134 | 17.6818 | 0        | 0        | yes |
| RIO1 family protein                                          | JZ6_10 | TZ19_10 | OK | 182.921 | 4.73325 | 1.06E-09 | 3.68E-09 | yes |
| Conserved hypothetical receptor                              | JZ6_10 | TZ19_10 | OK | 206.546 | 5.17063 | 0        | 0        | yes |



|                                                        |        |         |    |         |         |          |          |     |
|--------------------------------------------------------|--------|---------|----|---------|---------|----------|----------|-----|
| Flp pilus assembly protein CpaB                        | JZ6_10 | TZ19_10 | OK | 195.647 | 4.28769 | 3.25E-09 | 1.09E-08 | yes |
| Transcriptional regulators, LysR family                | JZ6_10 | TZ19_10 | OK | 137.914 | 2.53737 | 4.22E-07 | 1.18E-06 | yes |
| Chitinase                                              | JZ6_10 | TZ19_10 | OK | 49.124  | 0.82736 | 7.45E-09 | 2.43E-08 | yes |
| predicted ATPase with chaperone activity               | JZ6_10 | TZ19_10 | OK | 437.38  | 6.79591 | 0        | 0        | yes |
| hypothetical protein                                   | JZ6_10 | TZ19_10 | OK | 175.335 | 2.52305 | 3.23E-06 | 8.29E-06 | yes |
| Formamidopyrimidine-DNA glycosylase                    | JZ6_10 | TZ19_10 | OK | 318.808 | 4.14978 | 1.54E-11 | 6.10E-11 | yes |
| Extracellular zinc metalloprotease                     | JZ6_10 | TZ19_10 | OK | 2521.28 | 31.8837 | 0        | 0        | yes |
| Transcriptional regulator, LysR family                 | JZ6_10 | TZ19_10 | OK | 261.829 | 3.30519 | 5.47E-10 | 1.94E-09 | yes |
| Response regulator                                     | JZ6_10 | TZ19_10 | OK | 235.736 | 2.78394 | 5.10E-12 | 2.08E-11 | yes |
| conserved hypothetical protein                         | JZ6_10 | TZ19_10 | OK | 29173.3 | 307.291 | 0        | 0        | yes |
| Conserved hypothetical protein                         | JZ6_10 | TZ19_10 | OK | 209.483 | 2.03379 | 4.54E-11 | 1.74E-10 | yes |
| hypothetical protein                                   | JZ6_10 | TZ19_10 | OK | 118.987 | 1.09512 | 2.42E-07 | 6.95E-07 | yes |
| putative regulatory protein                            | JZ6_10 | TZ19_10 | OK | 877.894 | 7.93025 | 2.22E-07 | 6.40E-07 | yes |
| Hypothetical protein                                   | JZ6_10 | TZ19_10 | OK | 3772.68 | 29.1846 | 6.14E-10 | 2.17E-09 | yes |
| Hypothetical protein containg GGDEF domain             | JZ6_10 | TZ19_10 | OK | 329.016 | 2.34301 | 3.10E-10 | 1.12E-09 | yes |
| Transcriptional regulator                              | JZ6_10 | TZ19_10 | OK | 196.838 | 1.12526 | 3.31E-06 | 8.50E-06 | yes |
| ABC-type sugar transport system, periplasmic component | JZ6_10 | TZ19_10 | OK | 557.635 | 2.72008 | 0        | 0        | yes |
| Hypothetical protein                                   | JZ6_10 | TZ19_10 | OK | 27120.8 | 28.7404 | 0        | 0        | yes |
